# Supplementary material for: Iron-catalyzed C–O bond functionalization of butyrolactam derivatives with various N-/C-nucleophiles
Source: Royal Society of Chemistry journal article supplement (doi:10.1039/d0nj04548a), 2020-01-01

## Supporting Information

### **Iron-Catalyzed C-O Bond Functionalization of Butyrolactam Derivatives with Various *N-/C*-Nucleophiles**

Danhua Ge, Mao-Ling Wang, Xin Wang, and Xue-Qiang Chu\*

#### **Table of Contents**

|                                                                                                                                |          |
|--------------------------------------------------------------------------------------------------------------------------------|----------|
| 1. General information                                                                                                         | page S2  |
| 2. General procedures for the synthesis of butyrolactam derivatives                                                            | page S2  |
| 3. General procedures for iron-catalyzed C-O bond functionalization of butyrolactam derivatives with <i>N-/C</i> -nucleophiles | page S4  |
| 4. General procedure for the large-scale synthesis                                                                             | page S4  |
| 5. Mechanistic study                                                                                                           | page S4  |
| 6. Characterization data for products                                                                                          | page S5  |
| 7. References                                                                                                                  | page S15 |
| 8. <sup>1</sup> H, <sup>19</sup> F, and <sup>13</sup> C NMR spectra of products                                                | page S16 |

## 1. General information

Unless otherwise stated, all reagents were purchased from commercial suppliers and used without further purification. All reactions were carried out under air atmosphere using undistilled solvent. Melting points were recorded on an Electrothermal digital melting point apparatus. IR spectra were recorded on a FT-IR spectrophotometer using KBr optics.  $^1\text{H}$ ,  $^{19}\text{F}$ , and  $^{13}\text{C}$  NMR spectra were recorded in  $\text{CDCl}_3$  on Bruker Avance or Joel 400 MHz spectrometers. The chemical shifts ( $\delta$ ) are reported in ppm and coupling constants ( $J$ ) in Hz. High resolution mass spectra (HRMS) were obtained using a commercial apparatus (ESI Source). Column chromatography was generally performed on silica gel (300-400 mesh) and reactions were monitored by thin layer chromatography (TLC) using UV light to visualize the course of the reactions.

## 2. General procedures for the synthesis of butyrolactam derivatives

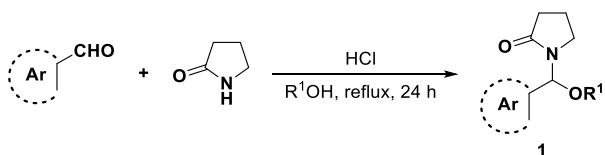

According to Ji's reported method,<sup>[1-2]</sup> a solution of aldehyde (10 mmol) and pyrrolidin-2-one (2.55g, 30 mmol) in alcohol (40 mL) and 0.5N hydrochloric acid (40 mL) was stirred under nitrogen atmosphere (by 3 times' vacuum evacuation/ $\text{N}_2$  backfill cycles) at room temperature for 24 h. The reaction was then quenched by saturated  $\text{NH}_4\text{Cl}$  solution (100 mL) and extracted with EtOAc (50 mL x 3). The organic layer was washed with saturated brine twice, dried over  $\text{MgSO}_4$ , filtered, and concentrated under reduced pressure. The crude product was purified by flash column chromatography (300-400 mesh) using petroleum ether/ethyl acetate as eluent to afford the butyrolactam derivatives **1**.

### Representative examples:

#### 1-(Ethoxy(4-nitrophenyl)methyl)pyrrolidin-2-one (**1a**):

$^1\text{H}$  NMR (300 MHz, Chloroform-*d*):  $\delta$  = 8.26–8.11 (m, 2H), 7.66–7.52 (m, 2H), 6.43 (s, 1H), 3.75–3.52 (m, 2H), 3.38–3.26 (m, 1H), 2.91–2.80 (m, 1H), 2.62–2.39 (m, 2H), 2.11–1.89 (m, 2H), 1.31 (t,  $J$  = 7.0 Hz, 3H).

#### 1-(Methoxy(4-nitrophenyl)methyl)pyrrolidin-2-one (**1a-MeOH**):

$^1\text{H}$  NMR (300 MHz, Chloroform-*d*):  $\delta$  = 8.26–8.16 (m, 2H), 7.65–7.47 (m, 2H), 6.33 (s, 1H), 3.50–3.37 (m, 3H), 3.35–3.23 (m, 1H), 2.90–2.76 (m, 1H), 2.63–2.39 (m, 2H), 2.14–1.83 (m, 2H).

#### 1-(Isopropoxy(4-nitrophenyl)methyl)pyrrolidin-2-one (**1a-<sup>i</sup>PrOH**):

$^1\text{H}$  NMR (300 MHz, Chloroform-*d*):  $\delta$  = 8.21 (d,  $J$  = 8.4 Hz, 2H), 7.58 (d,  $J$  = 8.6 Hz, 2H), 6.53 (s, 1H), 3.93–3.71 (m, 1H), 3.35 (q,  $J$  = 8.1 Hz, 1H), 2.96–2.77 (m, 1H), 2.49 (d,  $J$  = 8.5 Hz, 2H), 2.10–1.85 (m, 2H), 1.27 (d,  $J$  = 6.2 Hz, 6H).

#### 1-(Ethoxy(3-nitrophenyl)methyl)pyrrolidin-2-one (**1b**):

$^1\text{H}$  NMR (300 MHz, Chloroform-*d*):  $\delta$  = 8.60 (d,  $J$  = 21.4 Hz, 2H), 7.77–7.65 (m, 1H), 7.31 (s), 6.42 (d,  $J$  = 4.7 Hz, 1H), 3.71–3.53 (m, 2H), 3.40–3.25 (m, 1H), 2.99–2.86 (m, 1H), 2.56–2.44 (m, 2H), 2.10–1.88 (m, 2H), 1.30 (t,  $J$  = 7.0 Hz, 3H).

**1-(Ethoxy(2-nitrophenyl)methyl)pyrrolidin-2-one (1c):**

<sup>1</sup>H NMR (300 MHz, Chloroform-*d*):  $\delta$  = 7.81–7.73 (m, 1H), 7.67 (d, *J* = 7.7 Hz, 1H), 7.63–7.55 (m, 1H), 7.48 (t, *J* = 7.2 Hz, 1H), 6.76 (s, 1H), 3.62 (q, *J* = 6.8 Hz, 2H), 3.35–3.23 (m, 1H), 3.00–2.86 (m, 1H), 2.54–2.43 (m, 2H), 2.10–1.90 (m, 2H), 1.24 (t, *J* = 7.0 Hz, 3H).

**1-(Ethoxy(4-(methylsulfonyl)phenyl)methyl)pyrrolidin-2-one (1e):**

<sup>1</sup>H NMR (300 MHz, Chloroform-*d*):  $\delta$  = 7.98–7.84 (m, 2H), 7.60 (t, *J* = 9.7 Hz, 2H), 6.43 (s, 1H), 3.70–3.53 (m, 2H), 3.37–3.26 (m, 1H), 3.06 (s, 3H), 2.92–2.79 (m, 1H), 2.56–2.42 (m, 2H), 2.09–1.93 (m, 2H), 1.31 (t, *J* = 7.0 Hz, 3H).

**1-((3-Chlorophenyl)(ethoxy)methyl)pyrrolidin-2-one (1g):**

<sup>1</sup>H NMR (300 MHz, Chloroform-*d*):  $\delta$  = 8.70–8.54 (m, 1H), 7.77–7.67 (m, 1H), 7.56 (d, *J* = 7.9 Hz, 1H), 7.23 (t, *J* = 6.2 Hz, 1H), 6.38 (s, 1H), 3.76–3.59 (m, 2H), 3.43–3.29 (m, 1H), 3.08–2.94 (m, 1H), 2.50 (t, *J* = 8.1 Hz, 2H), 2.09–1.92 (m, 2H), 1.31 (t, *J* = 7.0 Hz, 3H).

**1-(Ethoxy(phenyl)methyl)pyrrolidin-2-one (1i):**

<sup>1</sup>H NMR (300 MHz, Chloroform-*d*):  $\delta$  = 7.49–7.27 (m, 5H), 6.37 (s, 1H), 3.70–3.51 (m, 2H), 3.38–3.24 (m, 1H), 3.02–2.86 (m, 1H), 2.59–2.35 (m, 2H), 2.07–1.81 (m, 2H), 1.29 (t, *J* = 7.0 Hz, 3H).

**1-((4-(Dimethylamino)phenyl)(ethoxy)methyl)pyrrolidin-2-one (1k):**

<sup>1</sup>H NMR (300 MHz, Chloroform-*d*):  $\delta$  = 7.27 (d, *J* = 18.2 Hz, 2H), 6.70 (d, *J* = 8.2 Hz, 2H), 6.29 (s, 1H), 3.74–3.50 (m, 2H), 3.43–3.26 (m, 1H), 3.14–2.82 (m, 7H), 2.60–2.35 (m, 2H), 2.08–1.85 (m, 2H), 1.41–1.16 (m, 3H).

**1-(Ethoxy(thiophen-2-yl)methyl)pyrrolidin-2-one (1n):**

<sup>1</sup>H NMR (300 MHz, Chloroform-*d*):  $\delta$  = 7.32–7.20 (m, 1H), 6.98 (d, *J* = 3.2 Hz, 2H), 6.55 (s, 1H), 3.61 (q, *J* = 7.0 Hz, 2H), 3.42–3.32 (m, 1H), 3.26–3.15 (m, 1H), 2.55–2.39 (m, 2H), 2.11–1.89 (m, 2H), 1.28 (t, *J* = 7.0 Hz, 3H).

**1-(Ethoxy(4-methoxyphenyl)methyl)pyrrolidin-2-one (1q):**

<sup>1</sup>H NMR (300 MHz, Chloroform-*d*):  $\delta$  = 7.31 (d, *J* = 8.3 Hz, 2H), 6.88 (d, *J* = 8.4 Hz, 2H), 6.32 (s, 1H), 3.80 (s, 3H), 3.65–3.52 (m, 2H), 3.37–3.24 (m, 1H), 3.01–2.89 (m, 1H), 2.57–2.35 (m, 2H), 2.06–1.86 (m, 2H), 1.28 (t, *J* = 7.0 Hz, 3H).

### 3. General procedures for iron-catalyzed C-O bond functionalization of butyrolactam derivatives with *N*-/*C*-nucleophiles

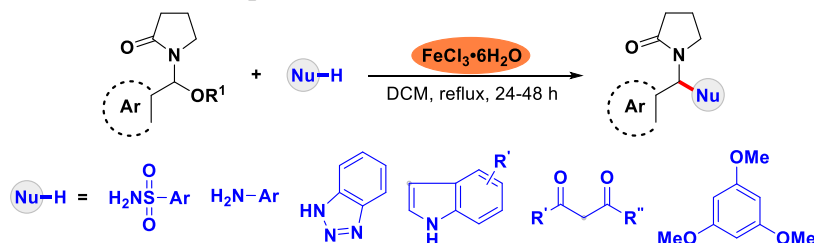

A solution of butyrolactam derivative **1** (1.2 mmol), *N*-/*C*-nucleophile (1.0 mmol), and  $\text{FeCl}_3 \cdot 6\text{H}_2\text{O}$  (16 mg, 0.1 mmol) in DCM (1.0 mL) was stirred under air at 40 °C for 24-48 h. Upon completion of the reaction (indicated by TLC), the free-flowing solid was filtered and washed with ethyl acetate/petroleum ether (1:4) to afford the desired products as pale white solids. The product thus obtained was recrystallized from ethanol or ethyl acetate to get pure compounds as white crystals. Once the final product can't be separated by filtration, the solvent of the resulting mixture was removed with the aid of a rotary evaporator, the pure product was obtained after purification of the residue by column chromatography (silica gel, ethyl acetate/petroleum ether).

### 4. General procedure for the large-scale synthesis

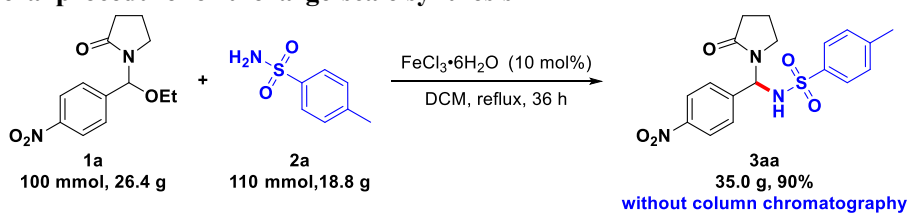

**1a** (100 mmol, 26.4 g), 4-methylbenzenesulfonamide **2a** (110 mmol, 18.8 g), and  $\text{FeCl}_3 \cdot 6\text{H}_2\text{O}$  (1.62 g, 10 mmol) in 100 mL of  $\text{CH}_2\text{Cl}_2$  was stirred at 40 °C for 36 h. The free-flowing solid was filtered and washed with ethyl acetate/petroleum ether (1:4) to afford the desired product as pale white solid (35.0 g, 90% isolated yield).

### 5. Mechanistic study

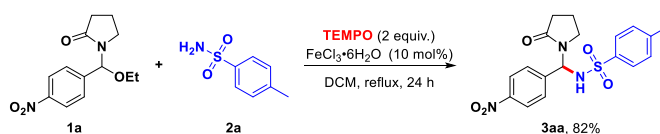

A solution of butyrolactam derivative **1a** (317 mg, 1.2 mmol), 4-methylbenzenesulfonamide (171 mg, 1.0 mmol), TEMPO (313 mg, 2 mmol), and  $\text{FeCl}_3 \cdot 6\text{H}_2\text{O}$  (16 mg, 0.1 mmol) in DCM (1.0 mL) was stirred under air at 40 °C for 24 h. Upon completion of the reaction (indicated by TLC), the free-flowing solid was filtered and washed with ethyl acetate/petroleum ether (1:4) to afford the desired products as pale white solids. The product thus obtained was recrystallized from ethanol or ethyl acetate to get pure compounds as white crystals (319 mg, 82% yield).

## 6. Characterization data for products

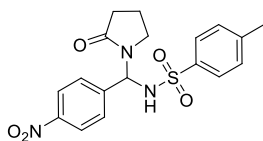

**4-Methyl-N-((4-nitrophenyl)(2-oxopyrrolidin-1-yl)methyl)benzenesulfonamide (3aa):** White solid. Mp = 223.7-226.5 °C. IR (KBr)  $\nu$  = 3097, 2936, 2896, 1662, 1517, 1470, 1339, 1159, 1092, 702, 671, 565  $\text{cm}^{-1}$ .  $^1\text{H}$  NMR (400 MHz, DMSO- $d_6$ ):  $\delta$  = 9.22 (d,  $J$  = 10.3 Hz, 1H), 8.27 (d,  $J$  = 8.7 Hz, 2H), 7.66 (d,  $J$  = 8.1 Hz, 2H), 7.55 (d,  $J$  = 8.4 Hz, 2H), 7.42 (d,  $J$  = 8.0 Hz, 2H), 6.57 (d,  $J$  = 10.2 Hz, 1H), 2.85–2.77 (m, 1H), 2.74–2.66 (m, 1H), 2.40 (s, 3H), 2.21–2.07 (m, 1H), 1.71–1.58 (m, 2H), 1.12–1.00 (m, 1H).  $^{13}\text{C}$  NMR (75 MHz, DMSO- $d_6$ ):  $\delta$  = 173.8, 147.3, 143.7, 143.2, 137.7, 129.4, 127.6, 126.4, 123.9, 61.5, 40.6, 29.8, 21.0, 16.7 ppm. HRMS(EI) calcd for  $\text{C}_{18}\text{H}_{20}\text{N}_3\text{O}_5\text{S}$   $[\text{M}+\text{H}]^+$  390.1124, Found 390.1117.

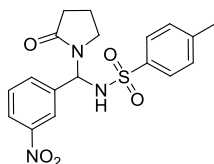

**4-Methyl-N-((3-nitrophenyl)(2-oxopyrrolidin-1-yl)methyl)benzenesulfonamide (3ba):** White solid. Mp = 192.2-193.8 °C. IR (KBr)  $\nu$  = 3140, 2964, 2903, 1647, 1530, 1469, 1436, 1338, 1163, 1018, 823, 735, 702  $\text{cm}^{-1}$ .  $^1\text{H}$  NMR (400 MHz, DMSO- $d_6$ ):  $\delta$  = 9.27 (d,  $J$  = 10.3 Hz, 1H), 8.22 (d,  $J$  = 7.8 Hz, 1H), 8.14 (s, 1H), 7.73–7.63 (m, 4H), 7.41 (d,  $J$  = 7.9 Hz, 2H), 6.58 (d,  $J$  = 10.3 Hz, 1H), 2.86–2.77 (m, 1H), 2.74–2.65 (m, 1H), 2.40 (s, 3H), 2.19–2.07 (m, 1H), 1.07–1.58 (m, 2H), 1.12–0.99 (m, 1H) ppm.  $^{13}\text{C}$  NMR (75 MHz, DMSO- $d_6$ ):  $\delta$  = 173.9, 148.0, 143.2, 138.7, 137.7, 132.8, 130.6, 129.4, 126.4, 123.3, 120.8, 61.3, 40.5, 29.8, 21.0, 16.7 ppm. HRMS(EI) calcd for  $\text{C}_{18}\text{H}_{20}\text{N}_3\text{O}_5\text{S}$   $[\text{M}+\text{H}]^+$  390.1124, Found 390.1118.

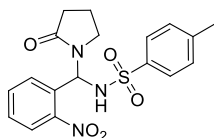

**4-Methyl-N-((2-nitrophenyl)(2-oxopyrrolidin-1-yl)methyl)benzenesulfonamide (3ca):** White solid. Mp = 165.5-167.9 °C. IR (KBr)  $\nu$  = 3201, 2912, 1669, 1532, 1418, 1352, 1286, 1168, 921, 814, 784, 685, 587  $\text{cm}^{-1}$ .  $^1\text{H}$  NMR (400 MHz, DMSO- $d_6$ ):  $\delta$  = 9.27 (d,  $J$  = 10.3 Hz, 1H), 8.22 (d,  $J$  = 7.8 Hz, 1H), 8.14 (s, 1H), 7.73–7.63 (m, 4H), 7.41 (d,  $J$  = 7.9 Hz, 2H), 6.58 (d,  $J$  = 10.3 Hz, 1H), 2.86–2.77 (m, 1H), 2.74–2.65 (m, 1H), 2.40 (s, 3H), 2.19–2.07 (m, 1H), 1.07–1.58 (m, 2H), 1.12–0.99 (m, 1H) ppm.  $^{13}\text{C}$  NMR (75 MHz, DMSO- $d_6$ ):  $\delta$  = 173.5, 148.7, 143.1, 137.9, 132.5, 129.9, 129.6, 129.4, 128.2, 126.5, 124.4, 58.8, 41.8, 29.8, 21.0, 17.0 ppm. HRMS(EI) calcd for  $\text{C}_{18}\text{H}_{20}\text{N}_3\text{O}_5\text{S}$   $[\text{M}+\text{H}]^+$  390.1124, Found 390.1125.

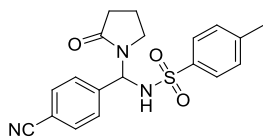

***N*-((4-Cyanophenyl)(2-oxopyrrolidin-1-yl)methyl)-4-methylbenzenesulfonamide (3da):** White solid. Mp = 174.5-176.5 °C. IR (KBr)  $\nu$  = 3262, 3207, 2230, 1700, 1595, 1335, 1264, 1154, 1083, 1010, 920, 860, 812, 689, 589  $\text{cm}^{-1}$ .  $^1\text{H}$  NMR (400 MHz, DMSO- $d_6$ ):  $\delta$  = 9.14 (d,  $J$  = 7.2 Hz, 1H), 7.88 (d,  $J$  = 8.1 Hz, 2H), 7.64 (d,  $J$  = 8.0 Hz, 2H), 7.43 (dd,  $J$  = 19.2, 8.0 Hz, 4H), 6.52 (d,  $J$  = 6.5 Hz, 1H), 2.85-2.75 (m, 1H), 2.74-2.65 (m, 1H), 2.21-2.07 (m, 1H), 1.71-1.58 (m, 2H), 1.14-0.97 (m, 1H) ppm.  $^{13}\text{C}$  NMR (75 MHz, DMSO- $d_6$ ):  $\delta$  = 173.9, 143.2, 141.8, 137.8, 132.8, 129.4, 127.2, 126.4, 118.5, 111.1, 61.6, 40.6, 29.8, 21.0, 16.7 ppm. HRMS(EI) calcd for  $\text{C}_{19}\text{H}_{20}\text{N}_3\text{O}_3\text{S}$   $[\text{M}+\text{H}]^+$  370.1225, Found 370.1235.

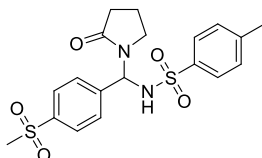

**4-Methyl-*N*-((4-(methylsulfonyl)phenyl)(2-oxopyrrolidin-1-yl)methyl)benzenesulfonamide (3ea):** White solid. Mp = 172.4-173.9 °C. IR (KBr)  $\nu$  = 3618, 3164, 2928, 1655, 1469, 1343, 1307, 1157, 1075, 959, 916, 818, 780, 758  $\text{cm}^{-1}$ .  $^1\text{H}$  NMR (400 MHz, DMSO- $d_6$ ):  $\delta$  = 9.15 (s, 1H), 7.96 (d,  $J$  = 8.2 Hz, 2H), 7.65 (d,  $J$  = 8.0 Hz, 2H), 7.53 (d,  $J$  = 8.1 Hz, 2H), 7.41 (d,  $J$  = 7.9 Hz, 2H), 6.55 (s, 1H), 3.22 (s, 3H), 2.85-2.77 (m, 1H), 2.75-2.67 (m, 1H), 2.40 (s, 3H), 2.19-2.07 (m, 1H), 1.71-1.59 (m, 2H), 1.12-1.00 (m, 1H) ppm.  $^{13}\text{C}$  NMR (75 MHz, DMSO- $d_6$ ):  $\delta$  = 173.8, 143.2, 142.1, 140.7, 137.8, 129.4, 127.6, 127.2, 126.4, 61.6, 43.5, 40.7, 29.9, 21.0, 16.7 ppm. HRMS(EI) calcd for  $\text{C}_{19}\text{H}_{23}\text{N}_2\text{O}_5\text{S}_2$   $[\text{M}+\text{H}]^+$  423.1048, Found 423.1048.

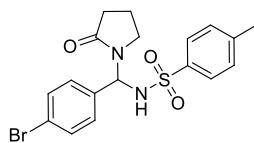

***N*-((4-Bromophenyl)(2-oxopyrrolidin-1-yl)methyl)-4-methylbenzenesulfonamide (2fa):** White solid. Mp = 182.7-184.7 °C. IR (KBr)  $\nu$  = 3107, 2949, 2898, 1657, 1469, 1337, 1286, 1162, 1084, 1009, 815, 665, 562  $\text{cm}^{-1}$ .  $^1\text{H}$  NMR (400 MHz, DMSO- $d_6$ ):  $\delta$  = 9.03 (d,  $J$  = 10.5 Hz, 1H), 7.62 (dd,  $J$  = 14.4, 8.2 Hz, 4H), 7.40 (d,  $J$  = 7.9 Hz, 2H), 7.21 (d,  $J$  = 8.5 Hz, 2H), 6.44 (d,  $J$  = 10.5 Hz, 1H), 2.81-2.74 (m, 1H), 2.73-2.65 (m, 1H), 2.39 (s, 3H), 2.16-2.04 (m, 1H), 1.68-1.54 (m, 2H), 1.08-0.96 (m, 1H) ppm.  $^{13}\text{C}$  NMR (75 MHz, DMSO- $d_6$ ):  $\delta$  = 173.6, 143.1, 137.9, 135.9, 131.6, 128.3, 126.4, 121.4, 61.4, 40.5, 29.9, 21.0, 16.7 ppm. HRMS(EI) calcd for  $\text{C}_{18}\text{H}_{20}\text{BrN}_2\text{O}_3\text{S}$   $[\text{M}+\text{H}]^+$  423.0378, Found 423.0378.

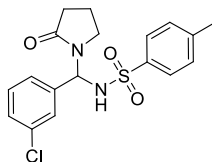

***N*-((3-Chlorophenyl)(2-oxopyrrolidin-1-yl)methyl)-4-methylbenzenesulfonamide (3ga):** White solid. Mp = 171.3-172.5 °C. IR (KBr)  $\nu$  = 3155, 2893, 1669, 1459, 1429, 1337, 1284, 1159, 1083, 890, 812, 693, 653  $\text{cm}^{-1}$ .  $^1\text{H}$  NMR (400 MHz, DMSO- $d_6$ ):  $\delta$  = 9.06 (d,  $J$  = 11.0 Hz, 1H), 7.64 (d,  $J$  = 7.4 Hz, 2H), 7.44-7.38 (m, 4H), 7.30 (s, 1H), 7.20 (d,  $J$  = 6.7 Hz, 1H), 6.47 (d,  $J$  = 10.2 Hz, 1H), 2.83-2.76 (m, 1H), 2.75-2.67 (m, 1H), 2.40 (s, 3H), 2.18-2.07 (m, 1H), 1.70-1.57 (m, 2H), 1.10-0.97 (m, 1H) ppm.  $^{13}\text{C}$  NMR (75 MHz, DMSO- $d_6$ ):  $\delta$  = 173.7, 143.1, 138.9, 137.8, 133.4, 129.4,

128.2, 126.3, 125.8, 124.8, 61.4, 40.6, 29.9, 21.0, 16.7 ppm. HRMS(EI) calcd for C<sub>18</sub>H<sub>20</sub>ClN<sub>2</sub>O<sub>3</sub>S [M+H]<sup>+</sup> 379.0883, Found 379.0888.

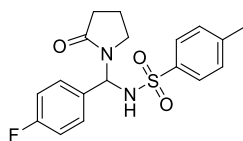

**N-((4-Fluorophenyl)(2-oxopyrrolidin-1-yl)methyl)-4-methylbenzenesulfonamide (3ha):** White solid. Mp = 176.4-179.3 °C. IR (KBr)  $\nu$  = 3194, 2937, 1642, 1595, 1412, 1379, 1212, 1021, 911, 834, 812, 635 cm<sup>-1</sup>. <sup>1</sup>H NMR (300 MHz, DMSO-d<sub>6</sub>):  $\delta$  = 9.00 (d,  $J$  = 10.1 Hz, 1H), 7.64 (d,  $J$  = 8.1 Hz, 2H), 7.40 (d,  $J$  = 8.0 Hz, 2H), 7.33–7.17 (m, 4H), 6.47 (d,  $J$  = 10.0 Hz, 1H), 2.83–2.67 (m, 2H), 2.40 (s, 3H), 2.18–2.04 (m, 1H), 1.70–1.54 (m, 2H), 1.11–0.94 (m, 1H) ppm. <sup>13</sup>C NMR (75 MHz, DMSO-d<sub>6</sub>):  $\delta$  = 173.7, 161.8 (d,  $J$  = 242.0 Hz), 143.1, 137.9, 132.6, 129.4, 128.2 (d,  $J$  = 7.7 Hz), 126.4, 115.6 (d,  $J$  = 21.6 Hz), 61.4, 41.4, 30.0, 21.0, 16.7 ppm. HRMS(EI) calcd for C<sub>18</sub>H<sub>20</sub>FN<sub>2</sub>O<sub>3</sub>S [M+H]<sup>+</sup> 363.1179, Found 363.1184.

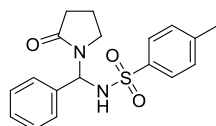

**4-Methyl-N-((2-oxopyrrolidin-1-yl)(phenyl)methyl)benzenesulfonamide (3ia):** White solid. Mp = 169.3-171.5 °C. IR (KBr)  $\nu$  = 3194, 2900, 1658, 1464, 1332, 1162, 1065, 1020, 815, 711, 687, 567 cm<sup>-1</sup>. <sup>1</sup>H NMR (300 MHz, DMSO-d<sub>6</sub>):  $\delta$  = 8.97 (d,  $J$  = 10.0 Hz, 1H), 7.65 (d,  $J$  = 8.1 Hz, 2H), 7.46–7.30 (m, 5H), 7.26 (d,  $J$  = 7.2 Hz, 2H), 6.49 (d,  $J$  = 9.9 Hz, 1H), 2.85–2.66 (m, 2H), 2.40 (s, 3H), 2.20–2.03 (m, 1H), 1.70–1.55 (m, 2H), 1.10–0.92 (m, 1H) ppm. <sup>13</sup>C NMR (100 MHz, DMSO-d<sub>6</sub>):  $\delta$  = 173.6, 143.0, 138.00, 136.4, 129.3, 128.7, 128.2, 126.4, 125.9, 61.8, 41.3, 30.0, 21.0, 16.7 ppm. HRMS(EI) calcd for C<sub>18</sub>H<sub>21</sub>N<sub>2</sub>O<sub>3</sub>S [M+H]<sup>+</sup> 345.1273, Found 345.1271.

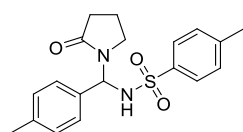

**4-Methyl-N-((2-oxopyrrolidin-1-yl)(p-tolyl)methyl)benzenesulfonamide (3ja):** White solid. Mp = 153.7-155.7 °C. IR (KBr)  $\nu$  = 3142, 1655, 1462, 1416, 1341, 1280, 1158, 1088, 912, 812, 681, 551 cm<sup>-1</sup>. <sup>1</sup>H NMR (400 MHz, DMSO-d<sub>6</sub>):  $\delta$  = 8.91 (d,  $J$  = 10.4 Hz, 1H), 7.64 (d,  $J$  = 8.2 Hz, 2H), 7.39 (d,  $J$  = 8.1 Hz, 2H), 7.20 (d,  $J$  = 8.0 Hz, 2H), 7.14 (d,  $J$  = 8.1 Hz, 2H), 6.45 (d,  $J$  = 10.5 Hz, 1H), 2.81–2.74 (m, 2H), 2.73–2.66 (m, 1H), 2.39 (s, 3H), 2.29 (s, 3H), 2.14–2.04 (m, 1H), 1.66–1.56 (m, 2H), 1.05–0.93 (m, 1H) ppm. <sup>13</sup>C NMR (100 MHz, DMSO-d<sub>6</sub>):  $\delta$  = 173.5, 142.9, 139.1, 137.4, 133.5, 129.3, 129.2, 126.4, 125.9, 61.7, 40.5, 30.0, 21.0, 20.6, 16.6 ppm. HRMS(EI) calcd for C<sub>19</sub>H<sub>23</sub>N<sub>2</sub>O<sub>3</sub>S [M+H]<sup>+</sup> 359.1429, Found 359.1434.

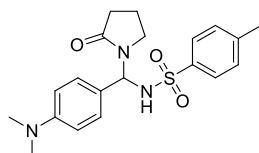

***N*-((4-(Dimethylamino)phenyl)(2-oxopyrrolidin-1-yl)methyl)-4-methylbenzenesulfonamide**

**(3ka):** Pure Yellow solid. Mp = 173.6-175.8 °C. IR (KBr)  $\nu$  = 3164, 2893, 1653, 1532, 1464, 1333, 1282, 1167, 1086, 921, 812, 677, 665  $\text{cm}^{-1}$ .  $^1\text{H}$  NMR (300 MHz, DMSO- $d_6$ ):  $\delta$  = 8.81 (s, 1H), 7.78 (dd,  $J$  = 11.9, 8.6 Hz, 4H), 7.41 (d,  $J$  = 8.1 Hz, 2H), 6.79 (d,  $J$  = 8.9 Hz, 2H), 3.25–3.17 (m, 2H), 3.08 (s, 6H), 2.38 (s, 3H), 2.13–2.01 (m, 2H), 2.01–1.89 (m, 2H) ppm.  $^{13}\text{C}$  NMR (75 MHz, DMSO- $d_6$ ):  $\delta$  = 177.3, 169.2, 155.0, 143.6, 136.8, 127.0, 118.8, 111.6, 41.4, 29.9, 21.1, 20.4 ppm. HRMS(EI) calcd for  $\text{C}_{20}\text{H}_{26}\text{N}_3\text{O}_3\text{S}$   $[\text{M}+\text{H}]^+$  388.1695, Found 388.169.

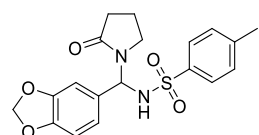

***N*-(Benzo[*d*][1,3]dioxol-5-yl)(2-oxopyrrolidin-1-yl)methyl)-4-methylbenzenesulfonamide (3la):**

White solid. Mp = 166.8-167.5 °C. IR (KBr)  $\nu$  = 3115, 2884, 1663, 1507, 1463, 1336, 1253, 1159, 1089, 914, 815, 691, 666  $\text{cm}^{-1}$ .  $^1\text{H}$  NMR (400 MHz, DMSO- $d_6$ ):  $\delta$  = 8.89 (d,  $J$  = 6.9 Hz, 1H), 7.63 (d,  $J$  = 7.9 Hz, 2H), 7.39 (d,  $J$  = 8.0 Hz, 2H), 6.91 (d,  $J$  = 8.6 Hz, 1H), 6.74 (d,  $J$  = 6.7 Hz, 2H), 6.38 (d,  $J$  = 8.1 Hz, 1H), 6.02 (s, 2H), 2.84–2.67 (m, 2H), 2.39 (s, 3H), 2.16–2.03 (m, 1H), 1.67–1.55 (m, 2H), 1.08–0.92 (m, 1H) ppm.  $^{13}\text{C}$  NMR (75 MHz, DMSO- $d_6$ ):  $\delta$  = 173.5, 131.0, 130.0, 129.3, 127.5, 126.4, 119.5, 108.3, 106.3, 102.6, 101.3, 61.7, 41.4, 29.9, 21.0, 20.4, 16.7 ppm. HRMS(EI) calcd for  $\text{C}_{19}\text{H}_{21}\text{N}_2\text{O}_5\text{S}$   $[\text{M}+\text{H}]^+$  389.1171, Found 389.1178.

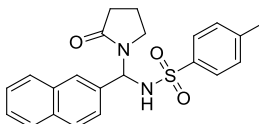

**4-Methyl-*N*-(naphthalen-2-yl)(2-oxopyrrolidin-1-yl)methyl)benzenesulfonamide (3ma):**

White solid. Mp = 184.5-186.2 °C. IR (KBr)  $\nu$  = 3434, 3161, 1167, 1459, 1337, 1285, 1166, 1087, 811, 671, 549  $\text{cm}^{-1}$ .  $^1\text{H}$  NMR (300 MHz, DMSO- $d_6$ ):  $\delta$  = 9.11 (d,  $J$  = 10.3 Hz, 1H), 7.94 (d,  $J$  = 8.2 Hz, 3H), 7.83 (s, 1H), 7.69 (d,  $J$  = 8.0 Hz, 2H), 7.59–7.49 (m, 2H), 7.41 (d,  $J$  = 7.9 Hz, 2H), 7.34 (d,  $J$  = 8.5 Hz, 1H), 6.66 (d,  $J$  = 10.2 Hz, 1H), 2.90–2.81 (m, 1H), 2.80–2.69 (m, 1H), 2.40 (s, 3H), 2.21–2.08 (m, 1H), 1.72–1.58 (m, 2H), 1.11–0.96 (m, 1H) ppm.  $^{13}\text{C}$  NMR (75 MHz, DMSO- $d_6$ ):  $\delta$  = 173.8, 143.1, 138.1, 134.0, 132.6, 132.5, 129.4, 128.6, 128.1, 127.5, 126.5, 125.6, 124.9, 123.9, 122.3, 62.0, 41.4, 30.1, 21.0, 16.8 ppm. HRMS(EI) calcd for  $\text{C}_{22}\text{H}_{23}\text{N}_2\text{O}_3\text{S}$   $[\text{M}+\text{H}]^+$  395.1429, Found 395.1428.

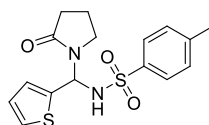

**4-Methyl-*N*-((2-oxopyrrolidin-1-yl)(thiophen-2-yl)methyl)benzenesulfonamide (3na):**

White solid. Mp = 175.3-176.5 °C. IR (KBr)  $\nu$  = 3158, 3113, 1661, 1465, 1334, 1167, 1075, 917, 815, 724,



663, 546  $\text{cm}^{-1}$ .  $^1\text{H}$  NMR (300 MHz,  $\text{DMSO-d}_6$ ):  $\delta$  = 9.18 (d,  $J$  = 9.6 Hz, 1H), 7.63 (d,  $J$  = 8.1 Hz, 2H), 7.53 (d,  $J$  = 4.8 Hz, 1H), 7.40 (d,  $J$  = 8.0 Hz, 2H), 7.05–6.97 (m, 1H), 6.93 (d,  $J$  = 3.3 Hz, 1H), 6.60 (d,  $J$  = 9.3 Hz, 1H), 2.96–2.85 (m, 1H), 2.81–2.71 (m, 1H), 2.39 (s, 3H), 2.18–2.05 (m, 1H), 1.70–1.55 (m, 2H), 1.09–0.94 (m, 1H) ppm.  $^{13}\text{C}$  NMR (100 MHz,  $\text{DMSO-d}_6$ ):  $\delta$  = 173.3, 143.2, 140.2, 137.8, 130.1, 129.4, 127.3, 126.4, 125.3, 59.4, 41.4, 29.9, 21.0, 16.8 ppm. HRMS(EI) calcd for  $\text{C}_{16}\text{H}_{19}\text{N}_2\text{O}_3\text{S}_2$   $[\text{M}+\text{H}]^+$  351.0837, Found 351.0843.

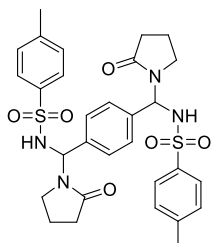

***N,N'*-(1,4-Phenylenebis((2-oxopyrrolidin-1-yl)methylene))bis(4-methylbenzenesulfonamide)**

**(3pa):** White solid. Mp >300 °C. IR (KBr)  $\nu$  = 3135, 2900, 1665, 1597, 1460, 1417, 1339, 1287, 1157, 1089, 921, 812, 774, 685  $\text{cm}^{-1}$ .  $^1\text{H}$  NMR (400 MHz,  $\text{DMSO-d}_6$ ):  $\delta$  = 8.99 (d,  $J$  = 10.3 Hz, 2H), 7.64 (d,  $J$  = 8.2 Hz, 4H), 7.40 (d,  $J$  = 8.1 Hz, 4H), 7.28 (s, 4H), 6.47 (t,  $J$  = 5.1 Hz, 2H), 2.82–2.74 (m, 2H), 2.73–2.64 (m, 2H), 2.39 (s, 6H), 2.16–2.04 (m, 2H), 1.67–1.56 (m, 4H), 1.08–0.95 (m, 2H) ppm.  $^{13}\text{C}$  NMR (100 MHz,  $\text{DMSO-d}_6$ ):  $\delta$  = 173.6, 143.0, 138.0, 136.5, 129.3, 126.5, 126.4, 61.6, 40.6, 29.9, 21.0, 16.7 ppm. HRMS(EI) calcd for  $\text{C}_{30}\text{H}_{35}\text{N}_4\text{O}_6\text{S}_2$   $[\text{M}+\text{H}]^+$  611.1998, Found 611.1995.

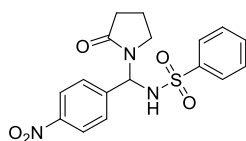

***N*-((4-Nitrophenyl)(2-oxopyrrolidin-1-yl)methyl)benzenesulfonamide (3ab):** White solid. Mp = 208.3–210.2 °C. IR (KBr)  $\nu$  = 3166, 2896, 1653, 1518, 1352, 1287, 1156, 1086, 1022, 913, 867, 722, 690, 606  $\text{cm}^{-1}$ .  $^1\text{H}$  NMR (300 MHz,  $\text{DMSO-d}_6$ ):  $\delta$  = 9.33 (d,  $J$  = 10.3 Hz, 1H), 8.27 (d,  $J$  = 8.6 Hz, 2H), 7.78 (d,  $J$  = 7.3 Hz, 2H), 7.73–7.53 (m, 5H), 6.60 (d,  $J$  = 10.3 Hz, 1H), 2.83–2.65 (m, 2H), 2.20–2.04 (m, 1H), 1.70–1.52 (m, 2H), 1.08–0.92 (m, 1H) ppm.  $^{13}\text{C}$  NMR (100 MHz,  $\text{DMSO-d}_6$ ):  $\delta$  = 173.8, 147.4, 143.6, 140.6, 132.8, 129.1, 127.6, 126.3, 124.0, 61.5, 40.6, 29.8, 16.7 ppm. HRMS(EI) calcd for  $\text{C}_{17}\text{H}_{18}\text{N}_3\text{O}_5\text{S}$   $[\text{M}+\text{H}]^+$  376.0967, Found 376.0964.

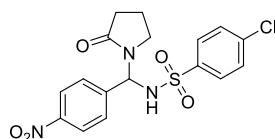

**4-Chloro-*N*-((4-nitrophenyl)(2-oxopyrrolidin-1-yl)methyl)benzenesulfonamide (3ac):** White solid. Mp = 196.8–198.0 °C. IR (KBr)  $\nu$  = 3098, 2893, 1662, 1517, 1465, 1348, 1279, 1160, 1093, 826, 755, 624  $\text{cm}^{-1}$ .  $^1\text{H}$  NMR (400 MHz,  $\text{DMSO-d}_6$ ):  $\delta$  = 9.46 (d,  $J$  = 7.9 Hz, 1H), 8.27 (d,  $J$  = 8.8 Hz, 2H), 7.77 (d,  $J$  = 8.7 Hz, 2H), 7.72 (d,  $J$  = 8.6 Hz, 2H), 7.56 (d,  $J$  = 8.8 Hz, 2H), 6.58 (d,  $J$  = 6.6 Hz, 1H), 2.90–2.82 (m, 1H), 2.77–2.69 (m, 1H), 2.23–2.13 (m, 1H), 1.76–1.63 (m, 2H), 1.20–1.09 (m, 1H).ppm.  $^{13}\text{C}$  NMR (100 MHz,  $\text{DMSO-d}_6$ ):  $\delta$  = 173.9, 147.4, 143.4, 139.5, 137.8, 129.2, 128.3, 127.6, 124.0, 61.5, 40.7, 29.7, 16.8 ppm. HRMS(EI) calcd for  $\text{C}_{17}\text{H}_{17}\text{ClN}_3\text{O}_5\text{S}$   $[\text{M}+\text{H}]^+$  410.0577,

Found 410.0572.

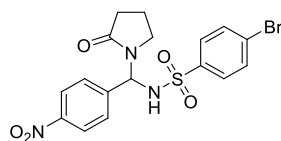

**4-Bromo-*N*-((4-nitrophenyl)(2-oxopyrrolidin-1-yl)methyl)benzenesulfonamide (3ad):** White solid. Mp = 209.5-210.1 °C. IR (KBr)  $\nu$  = 3095, 2889, 1655, 1514, 1466, 1341, 1278, 1166, 1090, 917, 870, 743, 614  $\text{cm}^{-1}$ .  $^1\text{H}$  NMR (400 MHz, DMSO- $d_6$ ):  $\delta$  = 9.45 (d,  $J$  = 10.2 Hz, 1H), 8.27 (d,  $J$  = 8.8 Hz, 2H), 7.86 (d,  $J$  = 8.6 Hz, 2H), 7.69 (d,  $J$  = 8.6 Hz, 2H), 7.56 (d,  $J$  = 8.6 Hz, 2H), 6.58 (d,  $J$  = 10.2 Hz, 1H), 2.90–2.81 (m, 1H), 2.77–2.69 (m, 1H), 2.24–2.13 (m, 1H), 1.76–1.62 (m, 2H), 1.20–1.07 (m, 1H) ppm.  $^{13}\text{C}$  NMR (100 MHz, DMSO- $d_6$ ):  $\delta$  = 173.9, 147.4, 143.3, 139.8, 132.2, 128.4, 127.6, 126.7, 124.0, 61.5, 40.7, 29.7, 16.8 ppm. HRMS(EI) calcd for  $\text{C}_{17}\text{H}_{17}\text{BrN}_3\text{O}_5\text{S}$   $[\text{M}+\text{H}]^+$  454.0072, Found 454.0078.

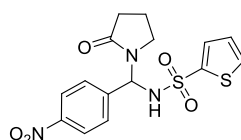

***N*-((4-Nitrophenyl)(2-oxopyrrolidin-1-yl)methyl)thiophene-2-sulfonamide (3af):** White solid. Mp = 197.3-198.1 °C. IR (KBr)  $\nu$  = 3146, 2914, 1638, 1514, 1457, 1341, 1285, 1151, 1018, 909, 856, 729  $\text{cm}^{-1}$ .  $^1\text{H}$  NMR (400 MHz, DMSO- $d_6$ ):  $\delta$  = 9.53 (d,  $J$  = 10.1 Hz, 1H), 8.27 (d,  $J$  = 8.8 Hz, 2H), 7.99 (dd,  $J$  = 5.0, 1.3 Hz, 1H), 7.56 (d,  $J$  = 8.5 Hz, 3H), 7.53 (dd,  $J$  = 3.7, 1.4 Hz, 1H), 7.20 (dd,  $J$  = 5.0, 3.8 Hz, 1H), 6.63 (d,  $J$  = 10.0 Hz, 1H), 3.03–2.94 (m, 1H), 2.83–2.75 (m, 1H), 2.26–2.17 (m, 1H), 1.91–1.81 (m, 1H), 1.80–1.71 (m, 1H), 1.40–1.28 (m, 1H) ppm.  $^{13}\text{C}$  NMR (100 MHz, DMSO- $d_6$ ):  $\delta$  = 174.0, 147.4, 143.6, 141.3, 133.4, 132.1, 127.6, 127.5, 124.0, 61.7, 41.0, 29.9, 17.1 ppm. HRMS(EI) calcd for  $\text{C}_{15}\text{H}_{16}\text{N}_3\text{O}_5\text{S}_2$   $[\text{M}+\text{H}]^+$  382.0531, Found 382.0536.

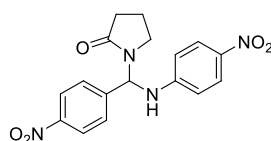

**1-((4-Nitrophenyl)(4-nitrophenylamino)methyl)pyrrolidin-2-one (3ag):** Yellow solid. Mp = 273.8-275.8 °C. IR (KBr)  $\nu$  = 3252, 3082, 1649, 1593, 1584, 1431, 1318, 1113, 842, 751, 705  $\text{cm}^{-1}$ .  $^1\text{H}$  NMR (300 MHz, DMSO- $d_6$ ):  $\delta$  = 8.31 (d,  $J$  = 8.6 Hz, 2H), 8.09 (d,  $J$  = 9.0 Hz, 3H), 7.72 (d,  $J$  = 8.6 Hz, 2H), 6.86 (d,  $J$  = 9.1 Hz, 2H), 6.76 (d,  $J$  = 8.4 Hz, 1H), 3.21–3.07 (m, 2H), 2.45–2.29 (m, 2H), 2.04–1.85 (m, 2H) ppm.  $^{13}\text{C}$  NMR (100 MHz, DMSO- $d_6$ ):  $\delta$  = 175.1, 152.2, 147.5, 144.2, 138.0, 128.1, 126.1, 123.9, 112.5, 61.3, 41.7, 30.4, 17.5 ppm. HRMS(EI) calcd for  $\text{C}_{17}\text{H}_{17}\text{N}_4\text{O}_5$   $[\text{M}+\text{H}]^+$  357.1199, Found 357.1204.

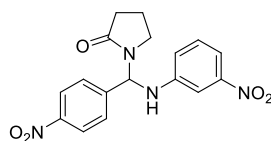

**1-((4-Nitrophenyl)(3-nitrophenylamino)methyl)pyrrolidin-2-one (3ah):** Yellow solid. Mp = 231.6-233.4 °C. IR (KBr)  $\nu$  = 3276, 1655, 1533, 1420, 1356, 1285, 1138, 1109, 733  $\text{cm}^{-1}$ .  $^1\text{H}$  NMR (400 MHz, DMSO- $d_6$ ):  $\delta$  = 8.31 (d,  $J$  = 8.6 Hz, 2H), 7.74 (d,  $J$  = 8.6 Hz, 2H), 7.64 (s, 1H), 7.56–7.42 (m, 3H), 7.17 (d,  $J$  = 8.2 Hz, 1H), 6.72 (d,  $J$  = 9.0 Hz, 1H), 3.18–3.05 (m, 2H), 2.45–2.26 (m, 2H), 2.02–1.91 (m, 1H), 1.90–1.80 (m, 1H) ppm.  $^{13}\text{C}$  NMR (75 MHz, DMSO- $d_6$ ):  $\delta$  = 175.2, 151.0, 148.8, 147.1, 144.6, 130.4, 128.1, 123.8, 119.4, 112.2, 107.1, 61.5, 41.4, 30.5, 17.5 ppm. HRMS(EI) calcd for  $\text{C}_{17}\text{H}_{17}\text{N}_4\text{O}_5$   $[\text{M}+\text{H}]^+$  357.1199, Found 357.1208.

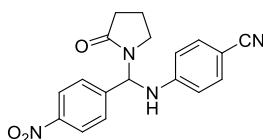

**4-((4-Nitrophenyl)(2-oxopyrrolidin-1-yl)methylamino)benzonitrile (3ai):** Pare Yellow solid. Mp = 258.4-260.5 °C. IR (KBr)  $\nu$  = 3266, 3172, 3087, 2221, 1653, 1594, 1430, 1335, 1289, 1181, 1102, 827, 779, 694, 588  $\text{cm}^{-1}$ .  $^1\text{H}$  NMR (300 MHz, DMSO- $d_6$ ):  $\delta$  = 8.30 (d,  $J$  = 8.6 Hz, 2H), 7.74–7.65 (m, 3H), 7.59 (d,  $J$  = 8.4 Hz, 2H), 6.85 (d,  $J$  = 8.5 Hz, 2H), 6.68 (d,  $J$  = 8.6 Hz, 1H), 3.18–3.06 (m, 2H), 2.44–2.28 (m, 2H), 2.03–1.80 (m, 2H) ppm.  $^{13}\text{C}$  NMR (75 MHz, DMSO- $d_6$ ):  $\delta$  = 175.4, 150.0, 147.6, 144.6, 133.8, 128.2, 124.0, 120.2, 113.5, 98.9, 61.4, 41.7, 30.6, 17.7 ppm. HRMS(EI) calcd for  $\text{C}_{18}\text{H}_{17}\text{N}_4\text{O}_3$   $[\text{M}+\text{H}]^+$  337.1301, Found 337.1309.

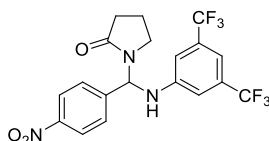

**1-((3,5-Bis(trifluoromethyl)phenylamino)(4-nitrophenyl)methyl)pyrrolidin-2-one (3aj):** White solid. Mp = 195.1-196.7 °C. IR (KBr)  $\nu$  = 3305, 2920, 1667, 1623, 1519, 1477, 1391, 1350, 1276, 1128, 846, 704, 682  $\text{cm}^{-1}$ .  $^1\text{H}$  NMR (400 MHz, DMSO- $d_6$ ):  $\delta$  = 8.32 (d,  $J$  = 8.8 Hz, 2H), 7.75 (d,  $J$  = 8.8 Hz, 3H), 7.36 (s, 2H), 7.29 (s, 1H), 6.79 (d,  $J$  = 8.9 Hz, 1H), 3.15–3.04 (m, 2H), 2.46–2.37 (m, 1H), 2.32–2.22 (m, 1H), 2.02–1.92 (m, 1H), 1.91–1.82 (m, 1H) ppm.  $^{13}\text{C}$  NMR (100 MHz, DMSO- $d_6$ ):  $\delta$  = 175.3, 147.4, 145.8 (d,  $J$  = 325.4 Hz), 131.1 (q,  $J$  = 31.9 Hz), 128.0, 123.8, 123.5 (d,  $J$  = 271.1 Hz), 113.1, 109.9, 61.1, 41.2, 30.3, 17.5 ppm. HRMS(EI) calcd for  $\text{C}_{19}\text{H}_{16}\text{F}_6\text{N}_3\text{O}_3$   $[\text{M}+\text{H}]^+$  448.1096, Found 448.1097.

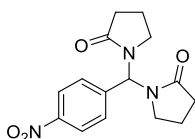

**1,1'-((4-Nitrophenyl)methylene)dipyrrolidin-2-one (3ak):** White solid. Mp = 160.6-162.4 °C. IR (KBr)  $\nu$  = 2975, 2937, 2879, 1696, 1511, 1407, 1344, 1266, 1209, 1103, 876, 702, 635, 530  $\text{cm}^{-1}$ .  $^1\text{H}$  NMR (400 MHz, DMSO- $d_6$ ):  $\delta$  = 8.23 (d,  $J$  = 8.7 Hz, 2H), 7.47 (d,  $J$  = 8.5 Hz, 2H), 6.88 (s, 1H), 3.32–3.27 (m, 4H), 2.42–2.30 (m, 4H), 2.09–1.97 (m, 4H) ppm.  $^{13}\text{C}$  NMR (100 MHz, DMSO- $d_6$ ):  $\delta$  = 174.9, 147.1, 143.4, 127.8, 123.9, 61.0, 44.7, 30.1, 18.1 ppm. HRMS(EI) calcd for  $\text{C}_{15}\text{H}_{18}\text{N}_3\text{O}_4$   $[\text{M}+\text{H}]^+$  304.1297, Found 304.1299.

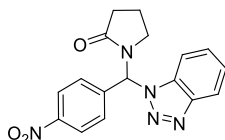

**1-((1H-Benzo[d][1,2,3]triazol-1-yl)(4-nitrophenyl)methyl)pyrrolidin-2-one (3a):** White solid. Mp = 162.6-164.8 °C. IR (KBr)  $\nu$  = 3481, 2939, 1697, 1525, 1490, 1409, 1352, 1265, 1060, 834, 778, 750  $\text{cm}^{-1}$ .  $^1\text{H}$  NMR (400 MHz, DMSO- $d_6$ ):  $\delta$  = 8.35 (s, 1H), 8.29 (d,  $J$  = 8.6 Hz, 2H), 8.16 (d,  $J$  = 8.3 Hz, 1H), 7.82 (d,  $J$  = 8.3 Hz, 1H), 7.61 (t,  $J$  = 7.6 Hz, 1H), 7.51–7.44 (m, 3H), 3.44–3.36 (m, 1H), 3.29–3.22 (m, 1H), 2.49–2.40 (m, 1H), 2.39–2.28 (m, 1H), 2.13–2.01 (m, 1H), 1.99–1.88 (m, 1H) ppm.  $^{13}\text{C}$  NMR (75 MHz, DMSO- $d_6$ ):  $\delta$  = 175.7, 147.8, 145.0, 141.5, 128.9, 128.4, 124.9, 124.1, 119.6, 111.0, 65.1, 44.0, 30.1, 17.8 ppm. HRMS(EI) calcd for  $\text{C}_{17}\text{H}_{16}\text{N}_5\text{O}_3$   $[\text{M}+\text{H}]^+$  338.1253, Found 338.1253.

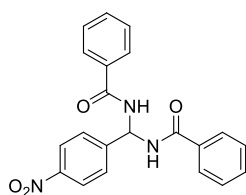

**N,N'-((4-Nitrophenyl)methylene)dibenzamide (3am):** White solid. Mp = 258.3-261.5 °C. IR (KBr)  $\nu$  = 3271, 1650, 1548, 1506, 1345, 1227, 1055, 851, 794, 720, 695, 676  $\text{cm}^{-1}$ .  $^1\text{H}$  NMR (300 MHz, DMSO- $d_6$ ):  $\delta$  = 9.21 (d,  $J$  = 7.4 Hz, 2H), 8.26 (d,  $J$  = 8.6 Hz, 2H), 7.93 (d,  $J$  = 7.2 Hz, 4H), 7.75 (d,  $J$  = 8.6 Hz, 2H), 7.61–7.45 (m, 6H), 7.08 (t,  $J$  = 7.3 Hz, 1H) ppm.  $^{13}\text{C}$  NMR (100 MHz, DMSO- $d_6$ ):  $\delta$  = 165.9, 147.6, 147.1, 133.5, 131.8, 128.4, 128.1, 127.6, 123.5 ppm. HRMS(EI) calcd for  $\text{C}_{21}\text{H}_{18}\text{N}_3\text{O}_4$   $[\text{M}+\text{H}]^+$  376.1297, Found 376.1299.

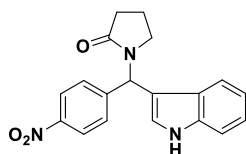

**1-((1H-Indol-3-yl)(4-nitrophenyl)methyl)pyrrolidin-2-one (5aa):** Yellow solid. M.p. = 206–208 °C. IR (KBr)  $\nu$  = 3437, 3189, 3079, 2978, 1653, 1518, 1348, 743  $\text{cm}^{-1}$ .  $^1\text{H}$  NMR (300 MHz,  $\text{CDCl}_3$ ):  $\delta$  = 8.36 (s, 1H), 8.21 (d,  $J$  = 8.7 Hz, 2H), 7.46 (dd,  $J$  = 19.3, 8.3 Hz, 3H), 7.30 – 7.23 (m, 2H), 7.09 (t,  $J$  = 7.5 Hz, 1H), 6.99 – 6.88 (m, 2H), 3.38 (td,  $J$  = 9.4, 9.0, 4.7 Hz, 1H), 3.12 (q,  $J$  = 8.0 Hz, 1H), 2.51 (dq,  $J$  = 17.4, 9.0, 8.0 Hz, 2H), 2.14 – 1.88 (m, 2H) ppm.  $^{13}\text{C}$  NMR (75 MHz,  $\text{CDCl}_3$ ):  $\delta$  = 175.3, 147.2, 146.9, 136.4, 128.1, 126.3, 124.6, 123.7, 122.8, 120.3, 119.2, 112.8, 111.6, 51.5, 44.6, 31.1, 18.1 ppm. HRMS: Calcd for  $\text{C}_{19}\text{H}_{17}\text{N}_3\text{O}_3$ :  $[\text{M}]^+$  335.1270; Found, 335.1275.

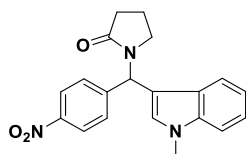

**1-((1-Methyl-1H-indol-3-yl)(4-nitrophenyl)methyl)pyrrolidin-2-one (5ab):** Yellow solid. M.p. = 140.1–142.1 °C. IR (KBr)  $\nu$  = 3442, 3056, 2938, 2877, 1681, 1518, 1343, 744  $\text{cm}^{-1}$ .  $^1\text{H}$  NMR (300 MHz,  $\text{CDCl}_3$ ):  $\delta$  = 8.21 (d,  $J$  = 8.6 Hz, 2H), 7.49 (d,  $J$  = 8.4 Hz, 2H), 7.35 (d,  $J$  = 8.5 Hz, 1H),

7.29 (s, 2H), 7.08 (t,  $J = 7.6$  Hz, 1H), 6.90 (s, 1H), 6.81 (s, 1H), 3.78 (s, 3H), 3.38 (td,  $J = 9.1, 4.5$  Hz, 1H), 3.12 (q,  $J = 8.3$  Hz, 1H), 2.64 – 2.37 (m, 2H), 2.21 – 1.87 (m, 2H) ppm.  $^{13}\text{C}$  NMR (100 MHz,  $\text{CDCl}_3$ ):  $\delta = 175.2, 147.1, 147.0, 137.2, 129.1, 128.1, 126.8, 123.7, 122.4, 119.9, 119.4, 111.2, 109.6, 51.5, 44.6, 32.9, 31.1, 18.1$  ppm. HRMS: Calcd for  $\text{C}_{20}\text{H}_{19}\text{N}_3\text{O}_3$ :  $[\text{M}]^+$  349.1426; Found, 349.1425.

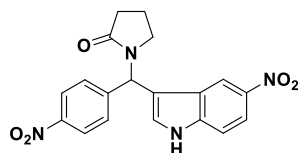

**1-((5-Nitro-1H-indol-3-yl)(4-nitrophenyl)methyl)pyrrolidin-2-one (5ac):** Yellow solid. M.p. = 103.3–105.3 °C. IR (KBr)  $\nu = 3430, 3126, 2898, 1655, 1514, 1335, 1097, 737$   $\text{cm}^{-1}$ .  $^1\text{H}$  NMR (300 MHz,  $\text{DMSO-d}_6$ ):  $\delta = 12.0$  (s, 1H), 8.32 – 8.23 (m, 2H), 8.19 (d,  $J = 2.3$  Hz, 1H), 8.04 (dd,  $J = 9.0, 2.3$  Hz, 1H), 7.60 (dd,  $J = 8.8, 4.3$  Hz, 3H), 7.45 (s, 1H), 6.85 (s, 1H), 3.29 (d,  $J = 9.0$  Hz, 1H), 3.01 (q,  $J = 8.1$  Hz, 1H), 2.41 – 2.36 (m, 2H), 2.03 – 1.84 (m, 2H) ppm.  $^{13}\text{C}$  NMR (100 MHz,  $\text{DMSO-d}_6$ ):  $\delta = 174.3, 146.9, 146.8, 140.8, 139.6, 139.4, 129.4, 129.2, 128.7, 125.5, 123.7, 117.1, 115.4, 114.4, 112.5, 50.5, 50.5, 44.1, 30.5, 17.7$  ppm, HRMS: Calcd for  $\text{C}_{19}\text{H}_{16}\text{N}_4\text{O}_5$ :  $[\text{M}]^+$  380.1121; Found, 380.1121.

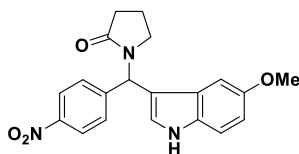

**1-((5-Methoxy-1H-indol-3-yl)(4-nitrophenyl)methyl)pyrrolidin-2-one (5ad):** Yellow solid. M.p. = 150.2–152.0 °C. IR (KBr)  $\nu = 3441, 3188, 2893, 1658, 1516, 1347, 1047, 727$   $\text{cm}^{-1}$ .  $^1\text{H}$  NMR (300 MHz,  $\text{CDCl}_3$ ):  $\delta = 8.22$  (d,  $J = 8.4$  Hz, 3H), 7.50 (d,  $J = 8.3$  Hz, 2H), 7.35 – 7.28 (m, 1H), 6.89 (s, 3H), 6.77 (s, 1H), 3.79 – 3.67 (m, 3H), 3.37 (s, 1H), 3.10 (d,  $J = 8.6$  Hz, 1H), 2.53 (q,  $J = 8.4$  Hz, 2H), 2.05 (d,  $J = 29.5$  Hz, 2H) ppm.  $^{13}\text{C}$  NMR (100 MHz,  $\text{CDCl}_3$ ):  $\delta = 175.3, 154.5, 146.8, 131.4, 128.1, 126.9, 125.1, 123.7, 113.0, 112.8, 112.3, 100.8, 55.8, 51.5, 44.5, 31.1, 18.1$  ppm. HRMS: Calcd for  $\text{C}_{20}\text{H}_{19}\text{N}_3\text{O}_4$ :  $[\text{M}]^+$  365.1376; Found, 365.1371.

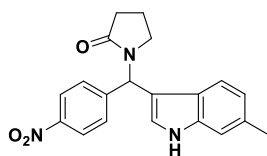

**1-((6-Methyl-1H-indol-3-yl)(4-nitrophenyl)methyl)pyrrolidin-2-one (5ae):** Yellow solid. M.p. = 166.3–168.3 °C. IR (KBr)  $\nu = 3437, 3221, 1657, 1518, 1349, 1111, 792, 725$   $\text{cm}^{-1}$ .  $^1\text{H}$  NMR (300 MHz,  $\text{CDCl}_3$ ):  $\delta = 8.20$  (d,  $J = 7.9$  Hz, 3H), 7.48 (d,  $J = 8.4$  Hz, 2H), 7.21 (s, 1H), 7.16 (d,  $J = 8.2$  Hz, 1H), 6.91 (d,  $J = 12.9$  Hz, 3H), 3.36 (d,  $J = 10.3$  Hz, 1H), 3.21 – 3.05 (m, 1H), 2.59 – 2.47 (m, 2H), 2.46 (s, 3H), 2.15 – 1.83 (m, 2H) ppm.  $^{13}\text{C}$  NMR (100 MHz,  $\text{CDCl}_3$ ):  $\delta = 175.2, 147.2, 146.9, 136.9, 132.8, 128.1, 124.2, 124.0, 123.7, 122.1, 118.9, 112.7, 111.5, 51.6, 44.6, 31.1, 21.6, 18.1$  ppm. HRMS: Calcd for  $\text{C}_{20}\text{H}_{19}\text{N}_3\text{O}_3$ :  $[\text{M}]^+$  349.1426; Found, 349.1422.

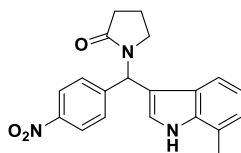

**1-((7-Methyl-1H-indol-3-yl)(4-nitrophenyl)methyl)pyrrolidin-2-one (5af):** White solid. M.p. = 123.9–125.6 °C. IR (KBr)  $\nu$  = 3448, 3225, 2983, 1646, 1517, 1346, 1129, 826  $\text{cm}^{-1}$ .  $^1\text{H}$  NMR (300 MHz,  $\text{CDCl}_3$ ):  $\delta$  = 11.21 (s, 1H), 8.23 (d,  $J$  = 8.5 Hz, 2H), 7.54 (d,  $J$  = 8.4 Hz, 2H), 7.09 (s, 1H), 6.99 (d,  $J$  = 7.4 Hz, 1H), 6.95 – 6.83 (m, 2H), 6.69 (s, 1H), 2.98 (q,  $J$  = 8.0 Hz, 1H), 2.75 (t,  $J$  = 6.5 Hz, 1H), 2.41 – 2.34 (m, 2H), 2.03 – 1.85 (m, 2H) ppm.  $^{13}\text{C}$  NMR (100 MHz,  $\text{CDCl}_3$ ): 174.8, 148.6, 147.3, 145.6, 129.1, 126.5, 124.3, 122.7, 121.8, 120.1, 116.6, 112.5, 51.8, 44.9, 31.2, 18.3, 17.4 ppm. HRMS: Calcd for  $\text{C}_{20}\text{H}_{19}\text{N}_3\text{O}_3$ :  $[\text{M}]^+$  349.1426; Found, 349.1427.

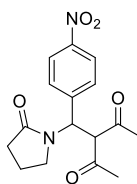

**3-((4-Nitrophenyl)(2-oxopyrrolidin-1-yl)methyl)pentane-2,4-dione (7aa):** White solid. M.p. = 123.2–124.2 °C. IR (KBr)  $\nu$  = 3409, 3111, 2966, 2866, 1687, 1519, 1419, 1354, 1265, 1168, 807, 704  $\text{cm}^{-1}$ .  $^1\text{H}$  NMR (400 MHz,  $\text{CDCl}_3$ ):  $\delta$  = 8.29 – 8.09 (m, 2H), 7.64 – 7.47 (m, 2H), 5.69 (d,  $J$  = 11.9 Hz, 1H), 5.19 (d,  $J$  = 11.9 Hz, 1H), 3.34 (ddd,  $J$  = 9.2, 8.0, 5.6 Hz, 1H), 3.22 (dt,  $J$  = 9.2, 7.4 Hz, 1H), 2.36 – 2.28 (m, 5H), 2.12 (s, 3H), 1.98 – 1.89 (m, 2H) ppm.  $^{13}\text{C}$  NMR (75 MHz,  $\text{CDCl}_3$ ):  $\delta$  = 200.5, 200.1, 175.5, 147.6, 144.1, 128.9, 124.1, 69.5, 55.5, 45.9, 31.2, 31.1, 28.3, 18.1 ppm. HRMS: Calcd for  $\text{C}_{16}\text{H}_{18}\text{N}_2\text{O}_5$ :  $[\text{M}]^+$  318.1216; Found, 318.1302.

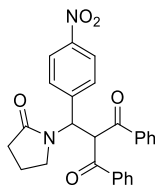

**2-((4-Nitrophenyl)(2-oxopyrrolidin-1-yl)methyl)-1,3-diphenylpropane-1,3-dione (7ab):** White solid. M.p. = 86.4–87.1 °C. IR (KBr)  $\nu$  = 3441, 3054, 2920, 1670, 1520, 1278, 1104, 1005, 857, 695  $\text{cm}^{-1}$ .  $^1\text{H}$  NMR (400 MHz,  $\text{CDCl}_3$ ):  $\delta$  = 8.59 (s, 1H), 8.05 (t,  $J$  = 7.9 Hz, 4H), 7.83 (d,  $J$  = 7.8 Hz, 2H), 7.70 (d,  $J$  = 8.3 Hz, 2H), 7.54 – 7.30 (m, 7H), 5.56 (d,  $J$  = 11.0 Hz, 1H), 3.59 (q,  $J$  = 8.1, 7.6 Hz, 1H), 3.48 (q,  $J$  = 8.0 Hz, 1H), 2.27 – 2.19 (m, 2H), 1.97 – 1.81 (m, 2H) ppm.  $^{13}\text{C}$  NMR (75 MHz,  $\text{CDCl}_3$ ):  $\delta$  = 193.3, 176.2, 147.4, 145.1, 136.2, 135.8, 134.0, 133.8, 129.6, 128.9, 128.8, 128.8, 123.7, 60.3, 57.5, 49.8, 31.9, 29.7, 18.4 ppm. HRMS: Calcd for  $\text{C}_{26}\text{H}_{22}\text{N}_2\text{O}_5$ :  $[\text{M}]^+$  442.1529; Found, 442.1414.

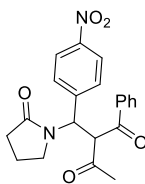

**2-((4-Nitrophenyl)(2-oxopyrrolidin-1-yl)methyl)-1-phenylbutane-1,3-dione (7ac):** White solid.

M.p. = 164.5-165.3 °C. IR (KBr)  $\nu$  = 3428, 3065, 2958, 1674, 1514, 1424, 1267, 1175, 857  $\text{cm}^{-1}$ . Characterized as a 5:2 diastereomeric mixture.  $^1\text{H}$  NMR (400 MHz,  $\text{CDCl}_3$ ):  $\delta$  = 8.10 (d,  $J$  = 8.7 Hz, 2H), 7.96 (d,  $J$  = 8.7 Hz, 2H), 7.65–7.45 (m, 5H), 6.10 (d,  $J$  = 11.4 Hz, 1H), 5.88 (d,  $J$  = 11.4 Hz, 1H), 3.49–3.43 (m, 1H), 3.22–3.16 (m, 1H), 2.39–2.34 (m, 2H), 2.23 (s, 3H), 1.97–1.92 (m, 2H) ppm. Isomer  $^1\text{H}$  NMR (400 MHz,  $\text{CDCl}_3$ ):  $\delta$  = 8.21 (d,  $J$  = 8.6 Hz, 2H), 8.13 (d,  $J$  = 8.6 Hz, 2H), 7.76 (d,  $J$  = 8.2 Hz, 2H), 7.67–7.62 (m, 4H), 6.47 (d,  $J$  = 11.4 Hz, 1H), 5.46 (d,  $J$  = 11.4 Hz, 1H), 3.46–3.43 (m, 1H), 3.35–3.34 (m, 1H), 2.19–2.17 (m, 2H), 1.97 (s, 3H), 1.92–1.86 (m, 2H) ppm.  $^{13}\text{C}$  NMR (75 MHz,  $\text{CDCl}_3$ ):  $\delta$  = 201.2, 192.7, 175.6, 147.5, 144.3, 135.8, 134.5, 129.1, 128.2, 123.9, 63.9, 55.4, 45.3, 31.2, 27.6, 18.3 ppm. Isomer  $^{13}\text{C}$  NMR (75 MHz,  $\text{CDCl}_3$ ):  $\delta$  = 201.2, 192.8, 175.6, 147.7, 145.0, 136.2, 134.2, 128.8, 128.6, 126.9, 121.7, 58.3, 48.7, 31.6, 30.5, 29.6, 18.2 ppm. HRMS: Calcd for  $\text{C}_{21}\text{H}_{20}\text{N}_2\text{O}_5$ :  $[\text{M}]^+$  380.1372; Found, 380.1264.

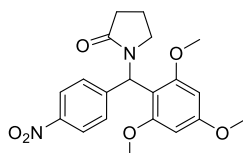

**1-((4-Nitrophenyl)(2,4,6-trimethoxyphenyl)methyl)pyrrolidin-2-one (9):** White solid. M.p. = 159.4-160.1 °C. IR (KBr)  $\nu$  = 3290, 2955, 1664, 1422, 1105, 779  $\text{cm}^{-1}$ .  $^1\text{H}$  NMR (300 MHz,  $\text{CDCl}_3$ ):  $\delta$  = 8.10 (d,  $J$  = 8.5 Hz, 2H), 7.15 (d,  $J$  = 8.5 Hz, 2H), 7.05 (s, 1H), 6.13 (s, 2H), 3.84 (s, 3H), 3.65–3.55 (m, 7H), 3.11 (q,  $J$  = 8.3 Hz, 1H), 2.62–2.37 (m, 2H), 2.21–2.00 (m, 2H) ppm.  $^{13}\text{C}$  NMR (100 MHz,  $\text{CDCl}_3$ ):  $\delta$  = 175.3, 161.8, 159.8, 150.4, 146.1, 126.0, 123.2, 106.4, 91.0, 55.5, 55.3, 49.3, 44.9, 30.9, 18.2 ppm. HRMS: Calcd for  $\text{C}_{20}\text{H}_{23}\text{N}_2\text{O}_6$ :  $[\text{M}+\text{H}]^+$  387.1551; Found, 387.1556.

## 7. References

- [1] H.-Y. Xu, X.-P. Xu, S.-Y. Wang, S.-J. Ji, *Eur. J. Org. Chem.* **2012**, 5440–5445.  
 [2] H.-Y. Xu, S.-Y. Wang, R. Jiang, X.-P. Xu, X.-Q. Chu, S.-J. Ji, *Tetrahedron* **2012**, *68*, 8340–8346.

## 8. The $^1\text{H}$ , $^{19}\text{F}$ , and $^{13}\text{C}$ NMR spectra of products

### 4-Methyl-*N*-((4-nitrophenyl)(2-oxopyrrolidin-1-yl)methyl)benzenesulfonamide (3aa):

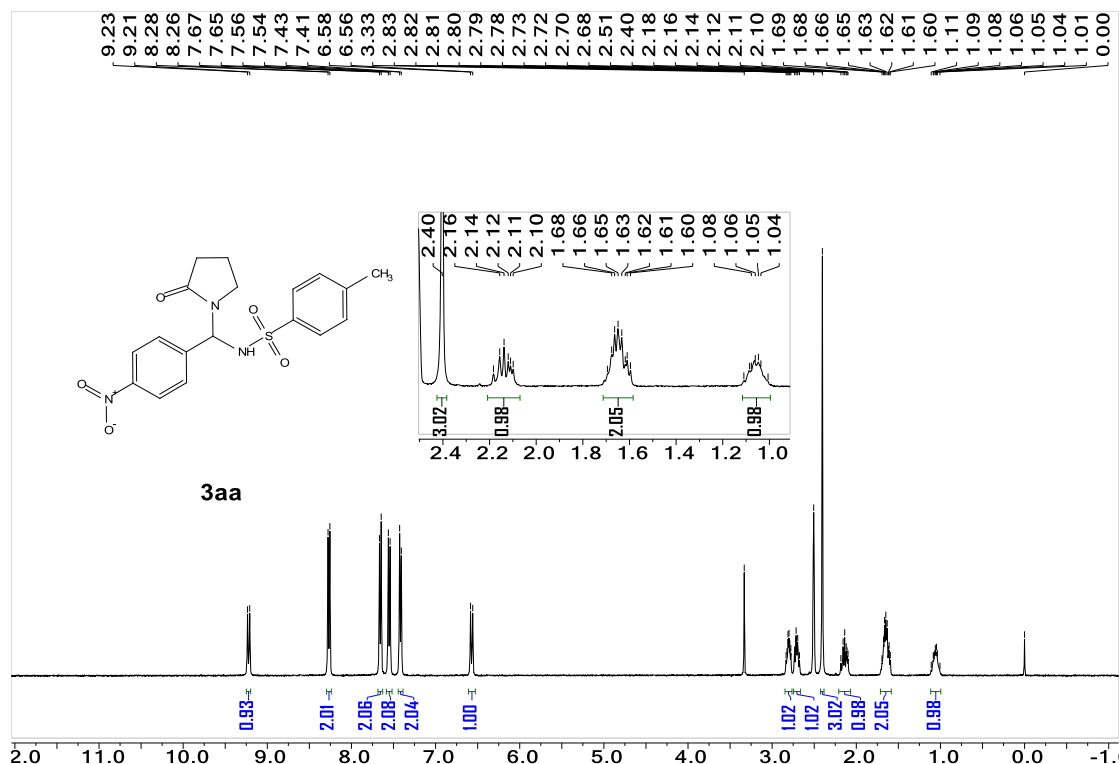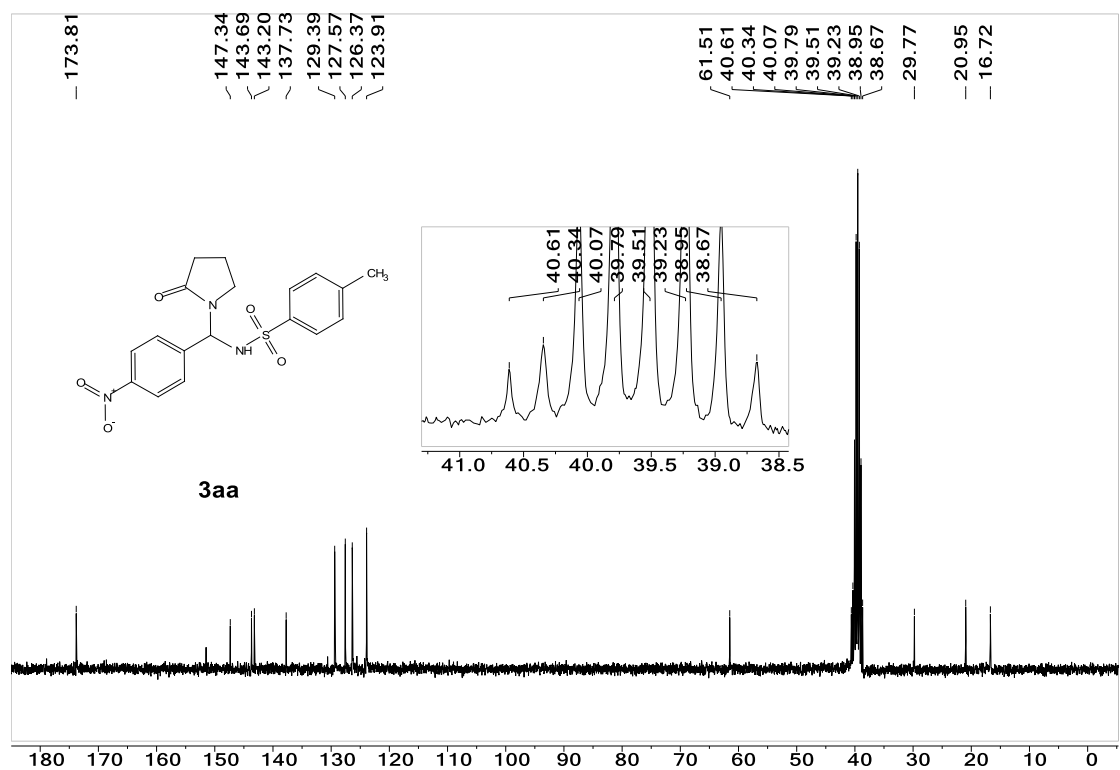



**4-Methyl-N-(3-nitrophenyl)(2-oxopyrrolidin-1-yl)methylbenzenesulfonamide (3ba):**

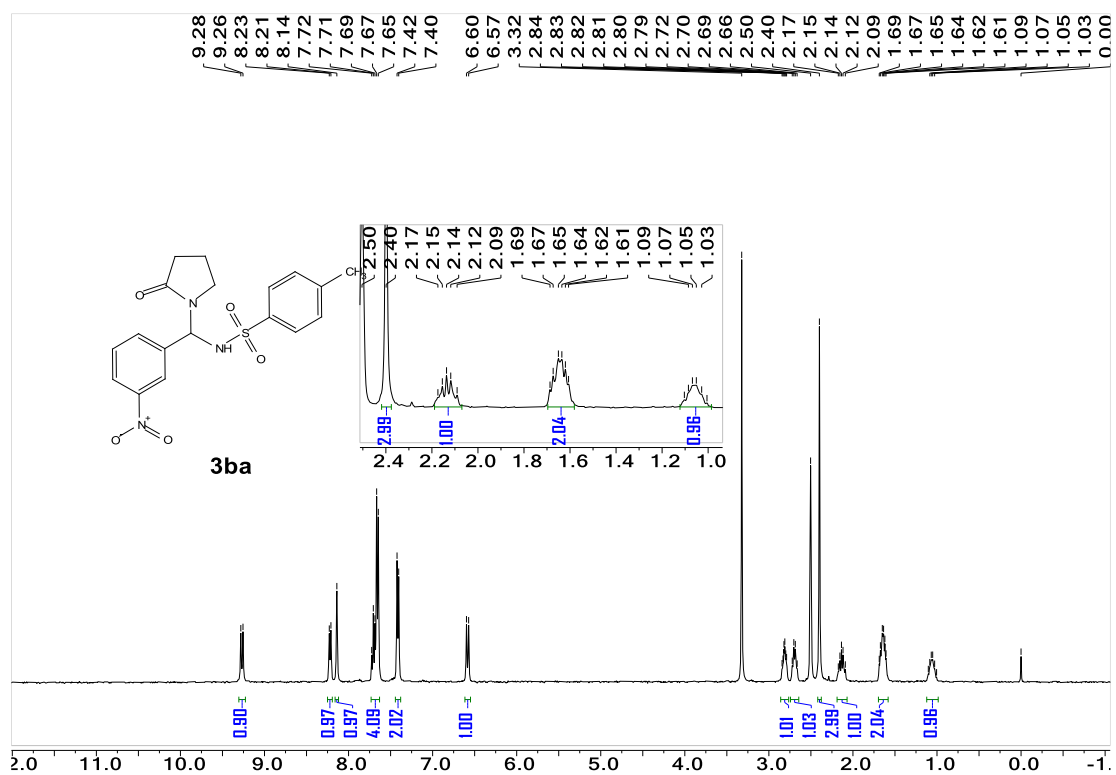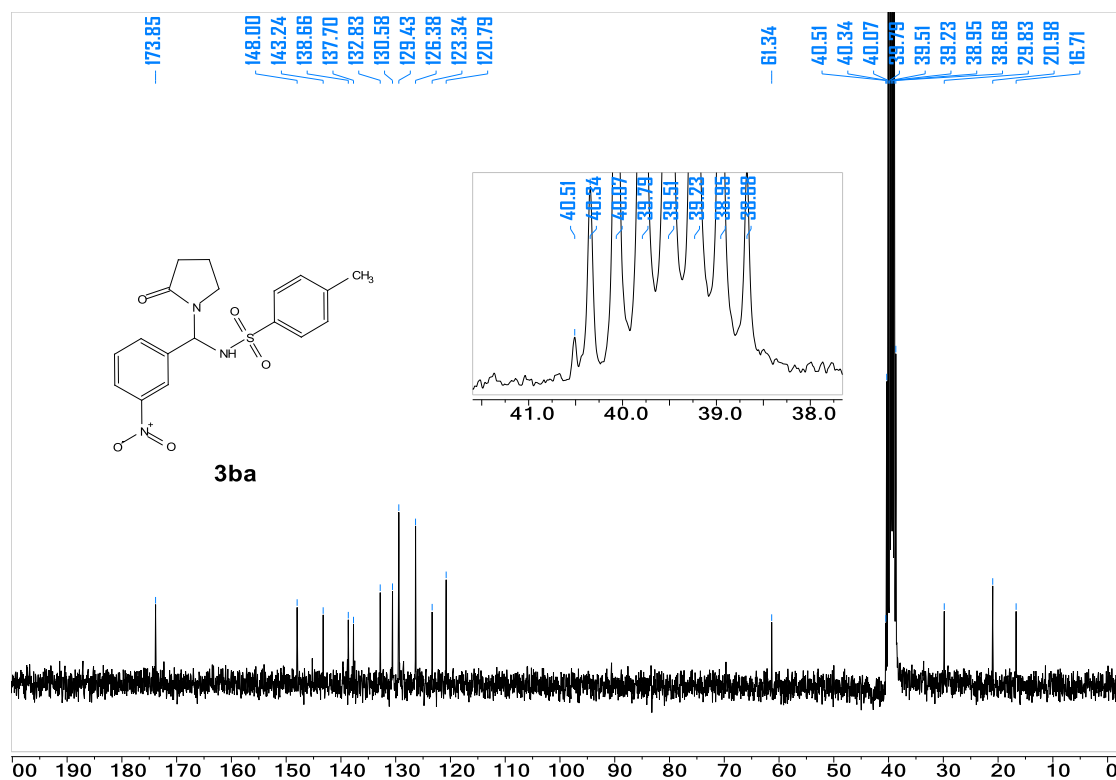

**4-Methyl-N-((2-nitrophenyl)(2-oxopyrrolidin-1-yl)methyl)benzenesulfonamide (3ca):**

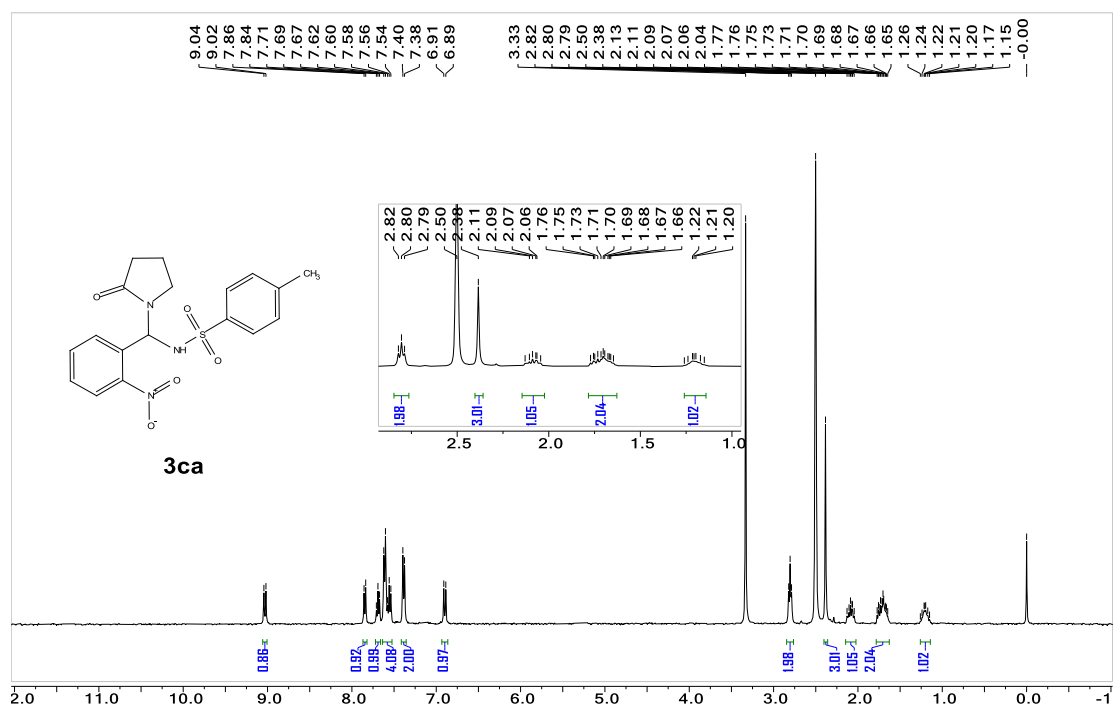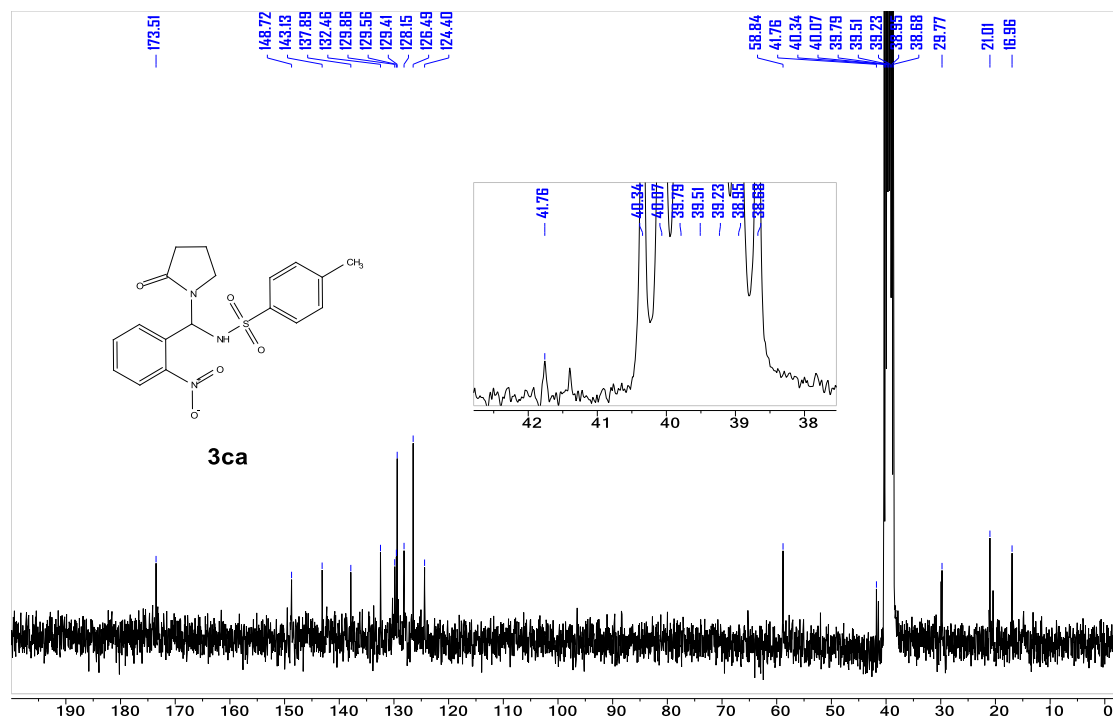

***N*-((4-Cyanophenyl)(2-oxopyrrolidin-1-yl)methyl)-4-methylbenzenesulfonamide (3da):**

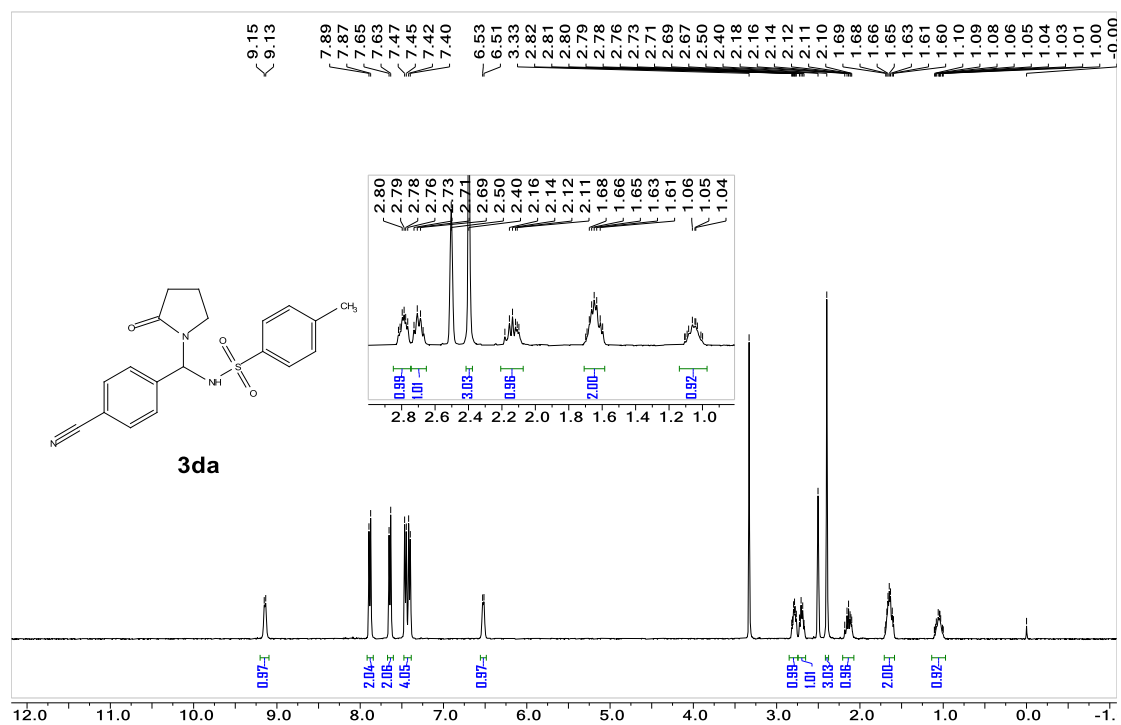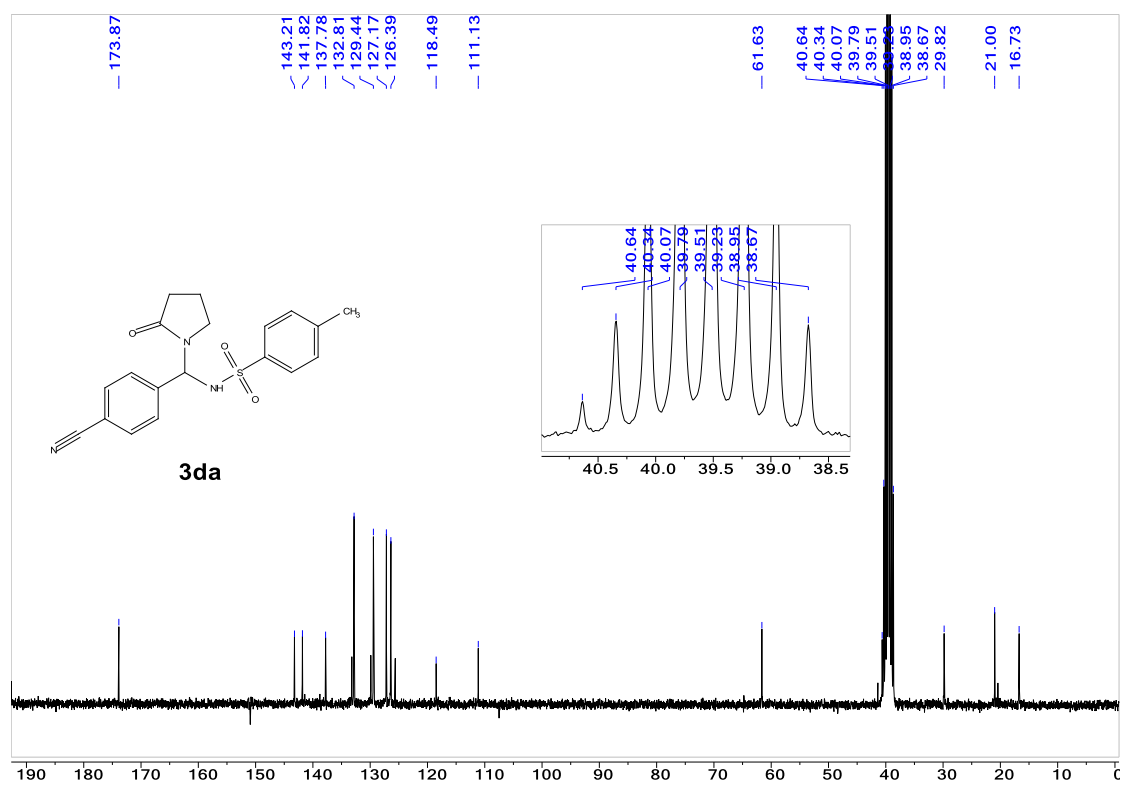

# 4-Methyl-N-((4-(methylsulfonyl)phenyl)(2-oxopyrrolidin-1-yl)methyl)benzenesulfonamide

(3ea):

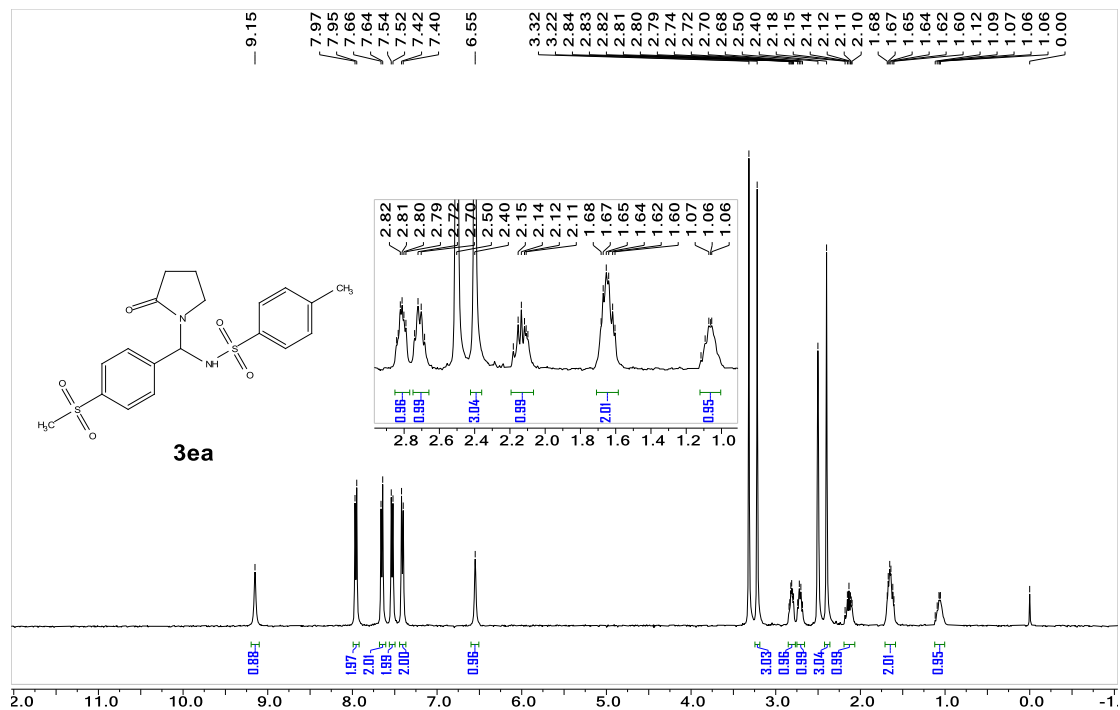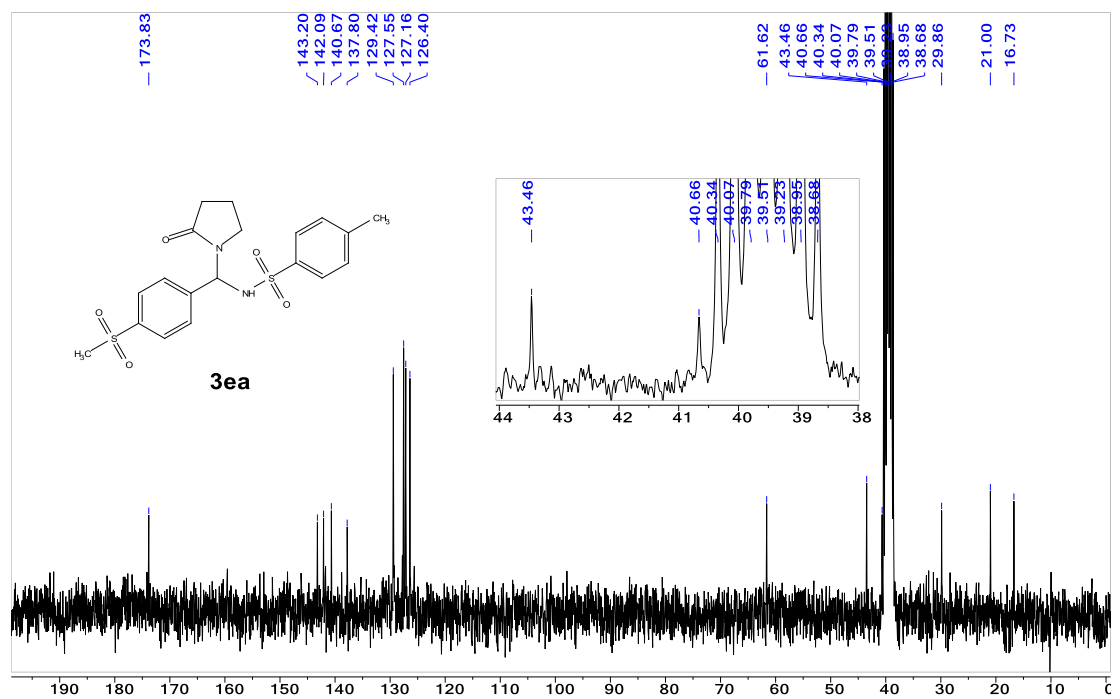

***N*-((4-Bromophenyl)(2-oxopyrrolidin-1-yl)methyl)-4-methylbenzenesulfonamide (3fa):**

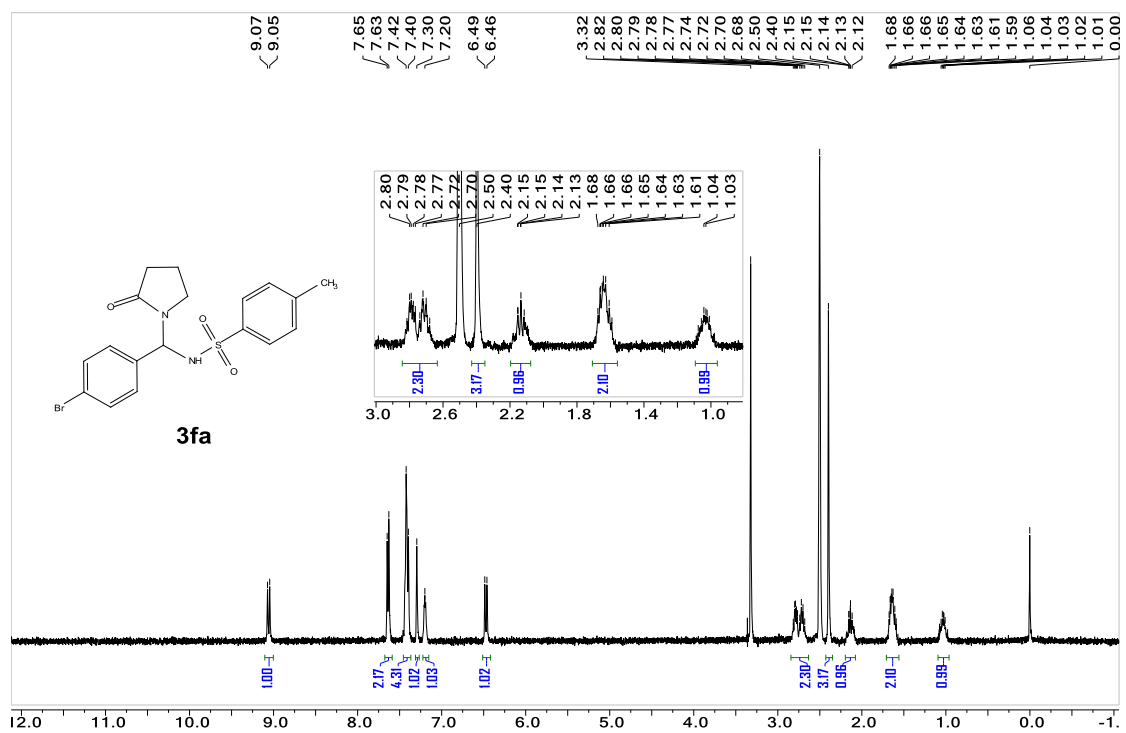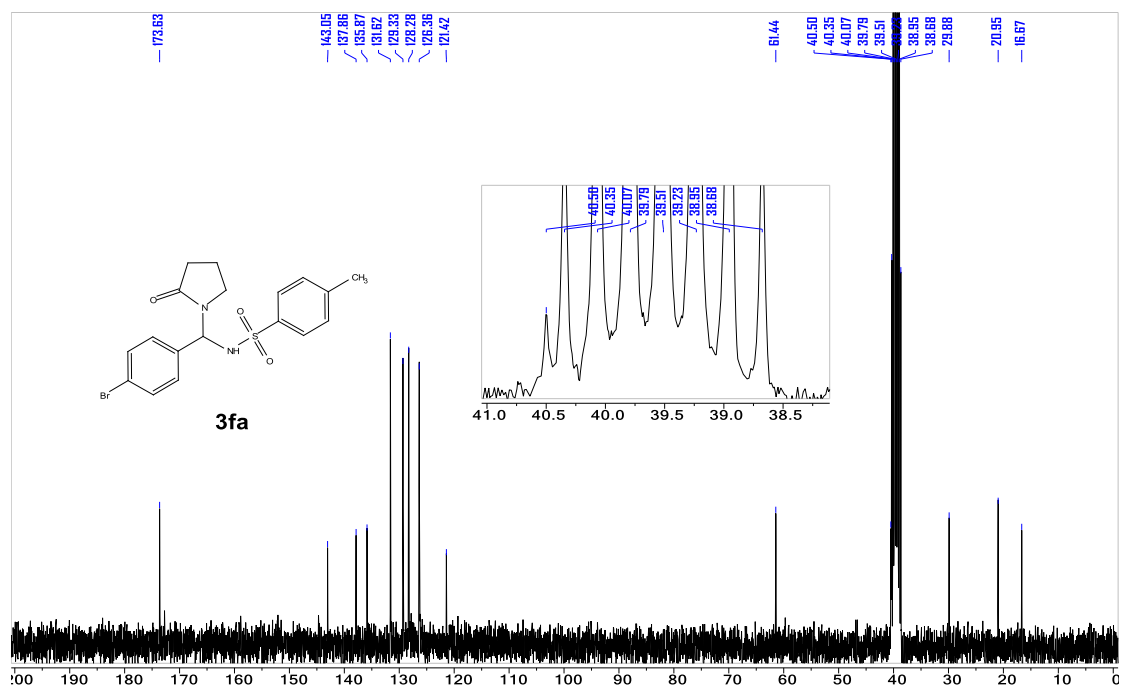

***N*-((3-Chlorophenyl)(2-oxopyrrolidin-1-yl)methyl)-4-methylbenzenesulfonamide (3ga):**

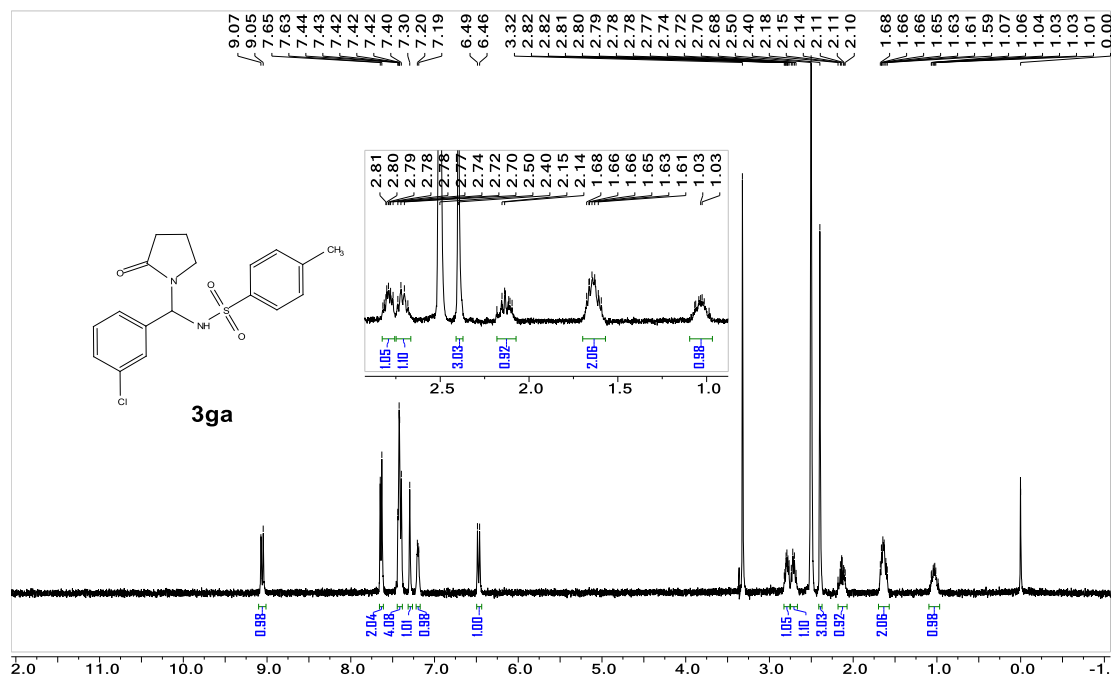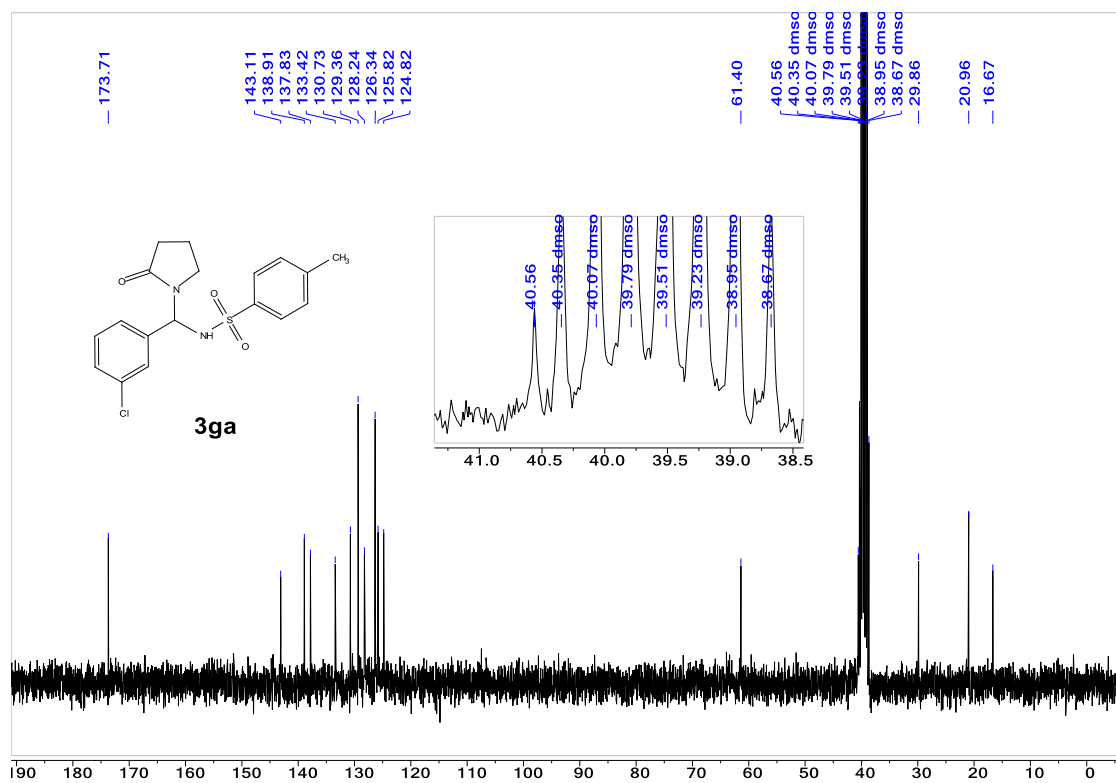

***N*-((4-Fluorophenyl)(2-oxopyrrolidin-1-yl)methyl)-4-methylbenzenesulfonamide (3ha):**

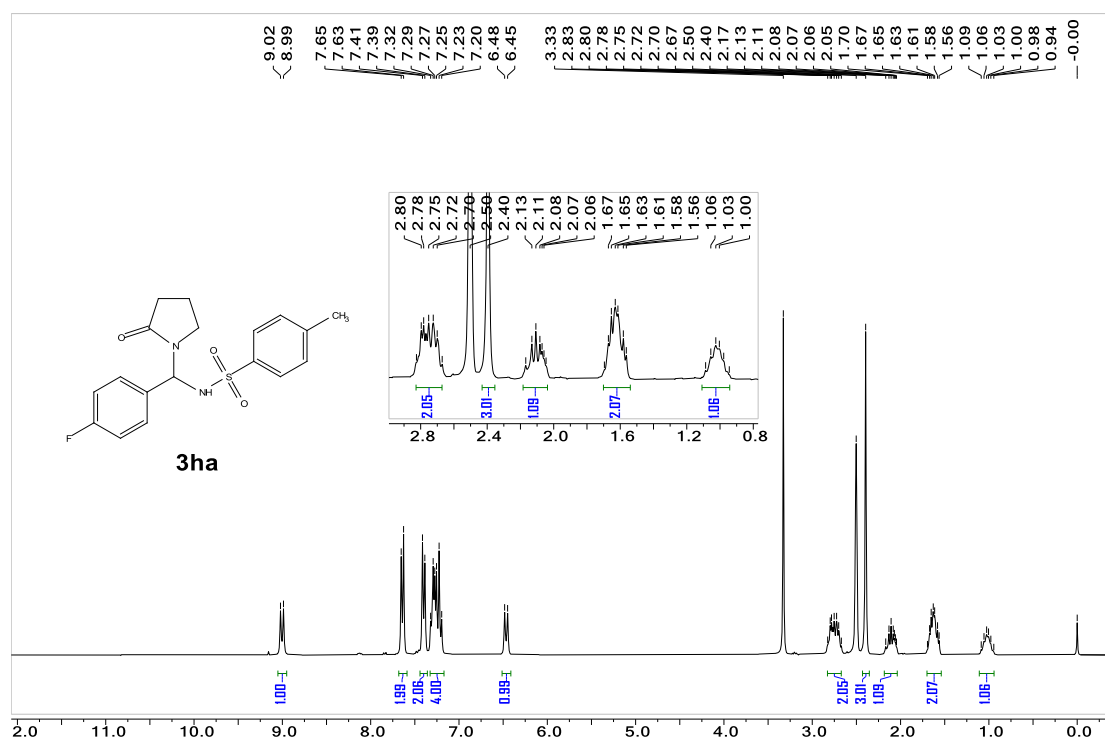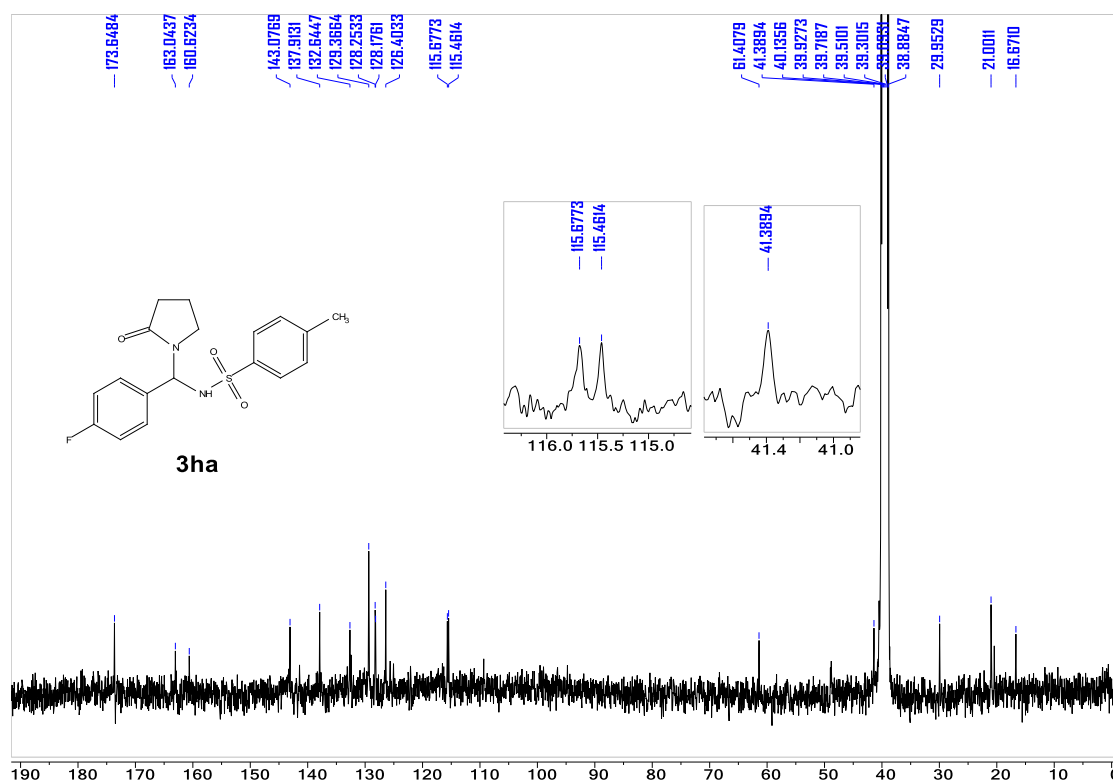

**4-Methyl-N-((2-oxopyrrolidin-1-yl)(phenyl)methyl)benzenesulfonamide (3ia):**

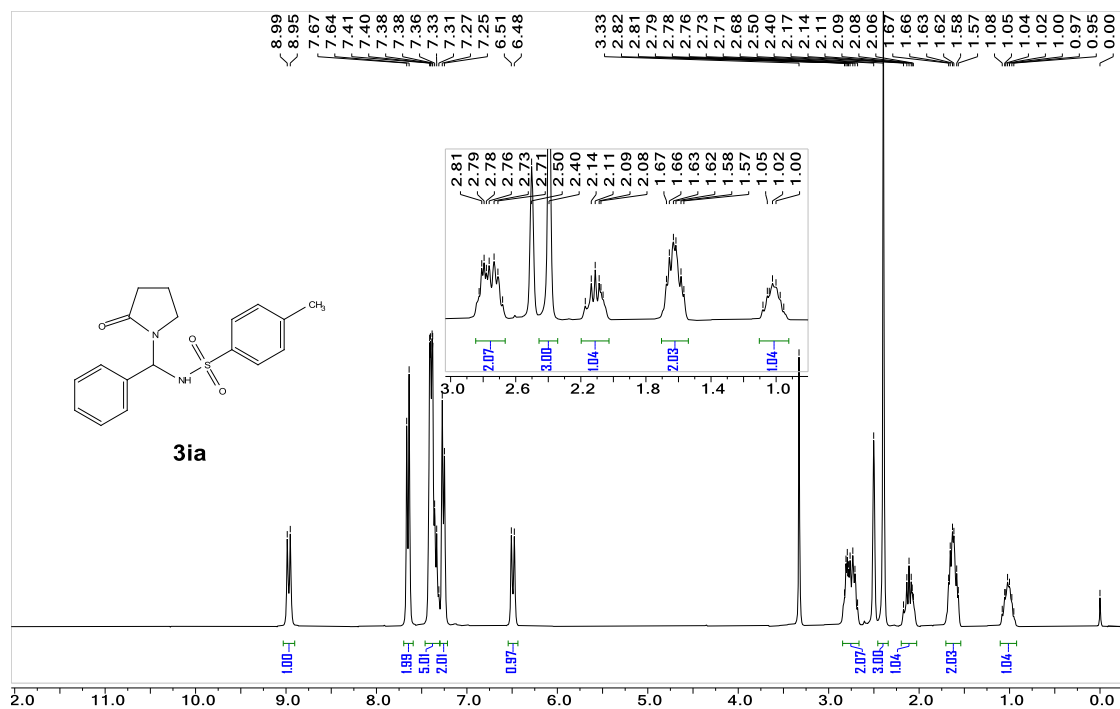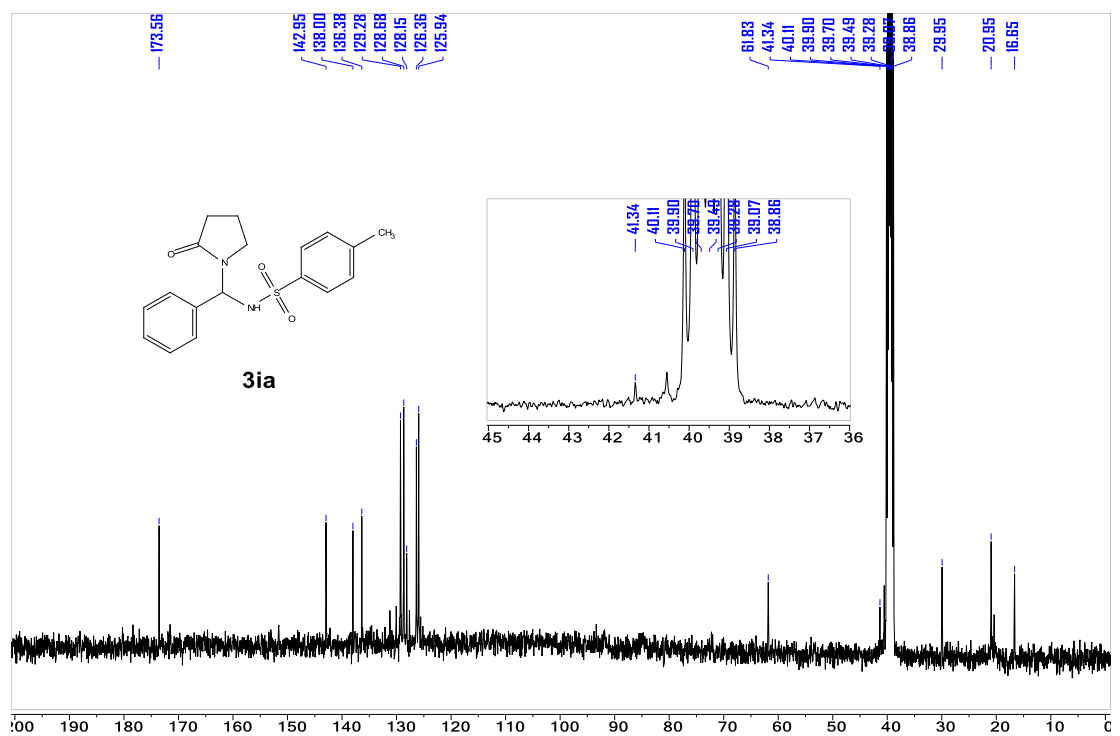



**4-Methyl-N-(2-oxopyrrolidin-1-yl)(*p*-tolyl)methylbenzenesulfonamide (3ja):**

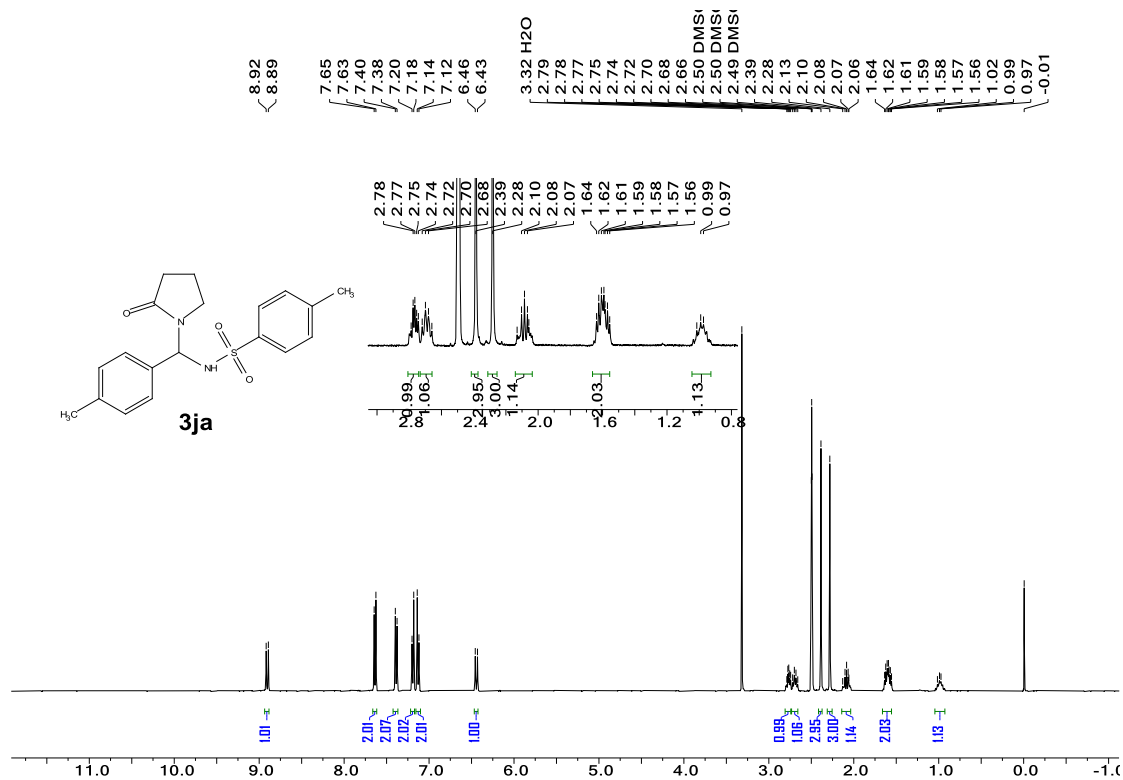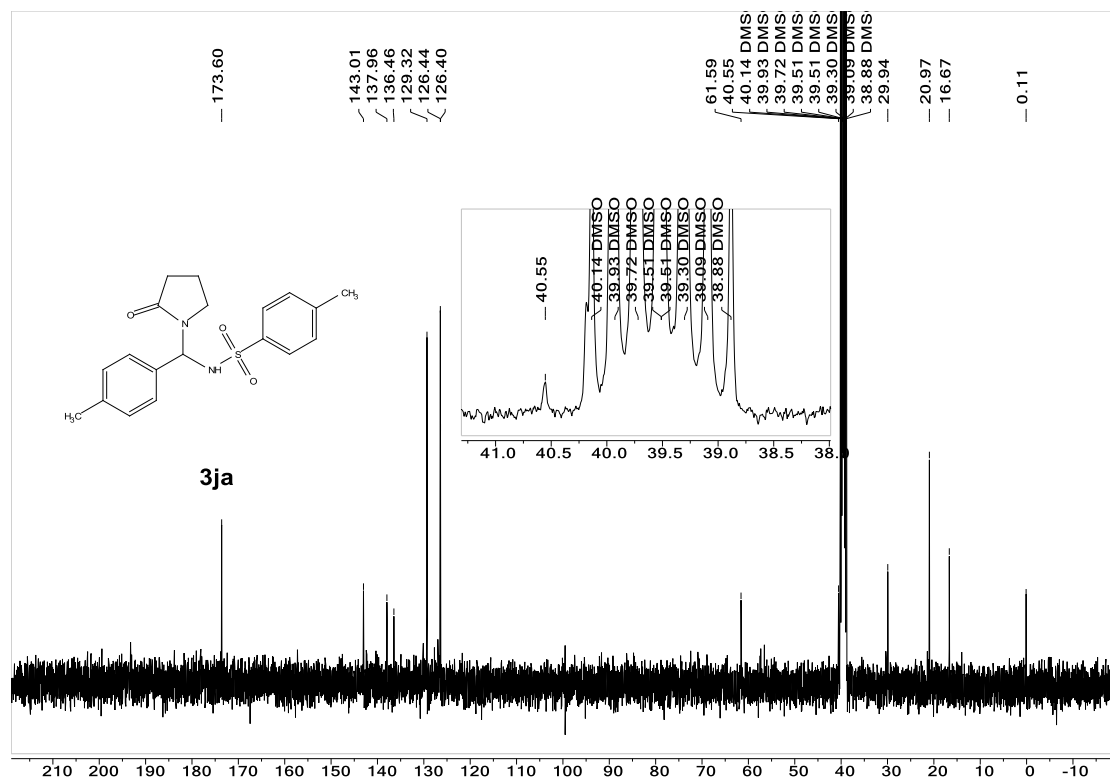

***N*-((4-(Dimethylamino)phenyl)(2-oxopyrrolidin-1-yl)methyl)-4-methylbenzenesulfonamide**

**(3ka):**

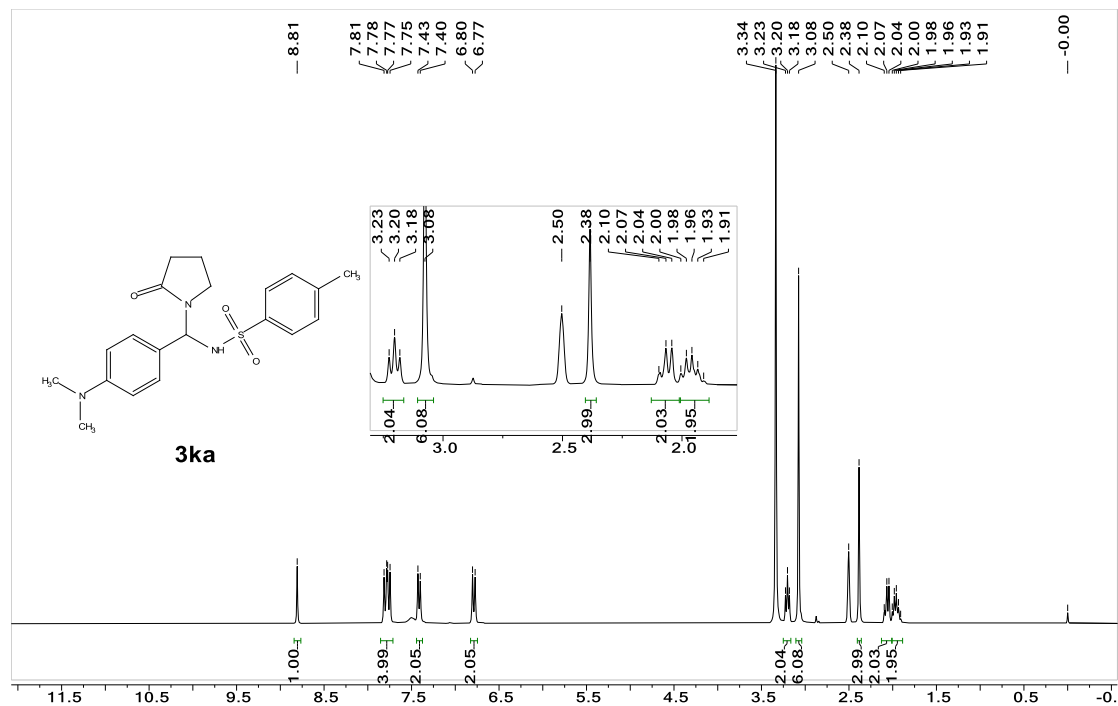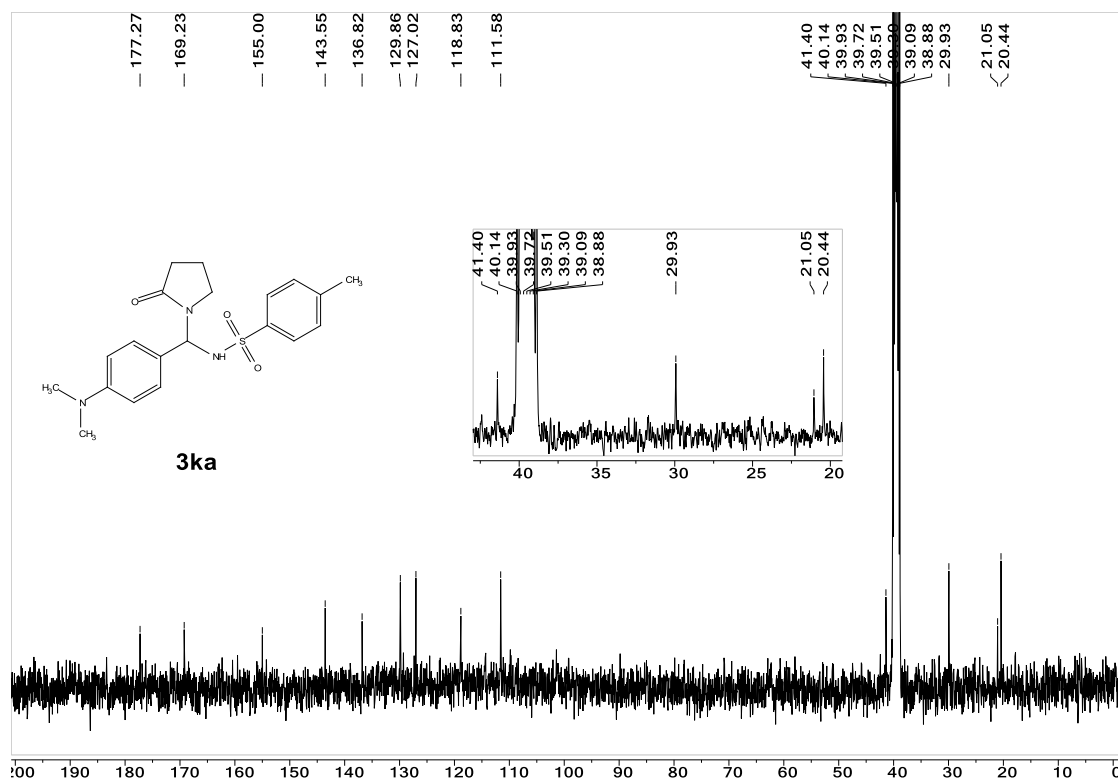





**4-Methyl-N-((2-oxopyrrolidin-1-yl)(thiophen-2-yl)methyl)benzenesulfonamide (3na):**

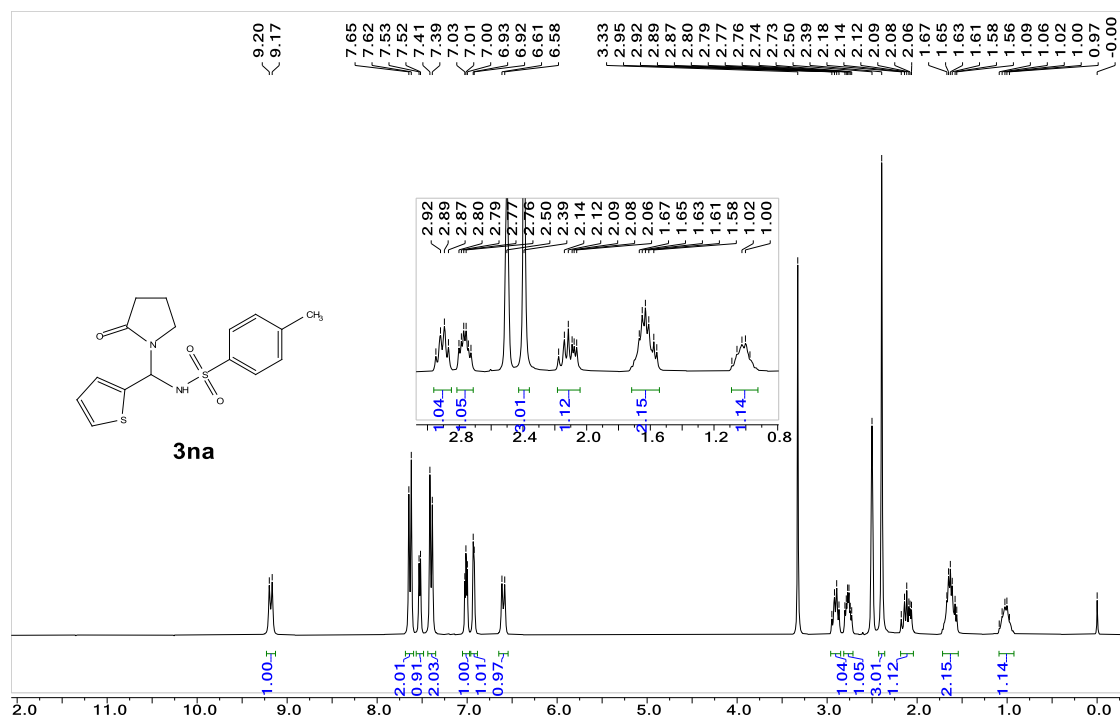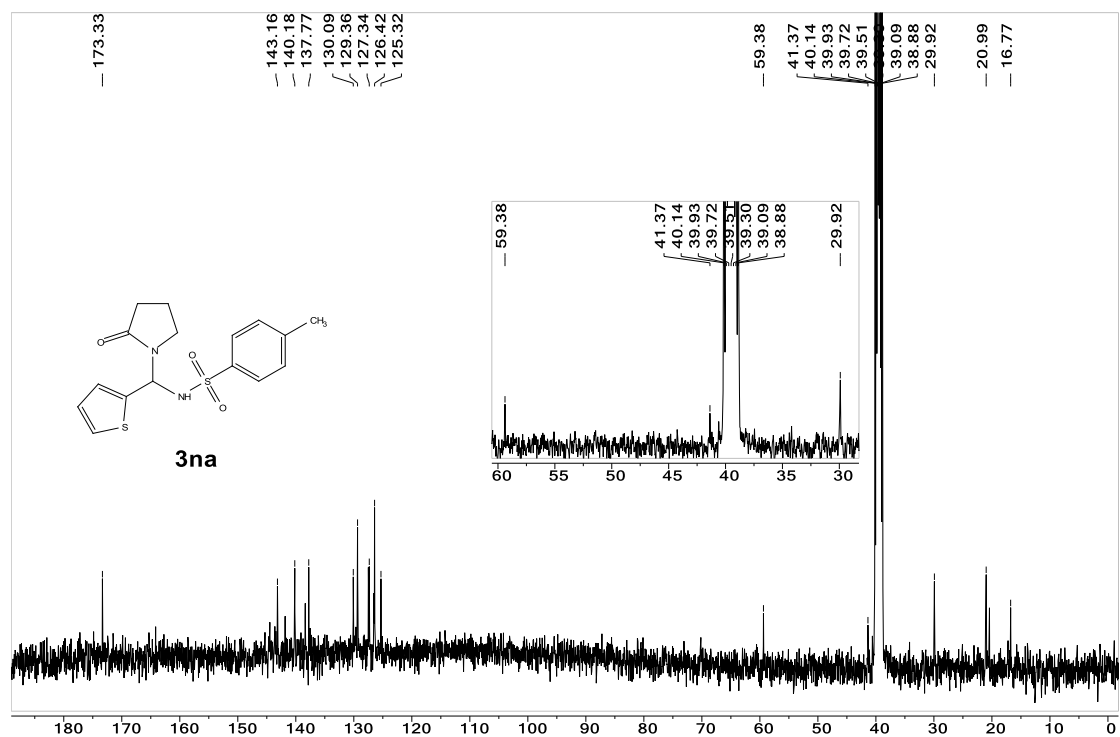

***N,N'*-(1,4-Phenylenebis((2-oxopyrrolidin-1-yl)methylene))bis(4-methylbenzenesulfonamide)**

**(3pa):**

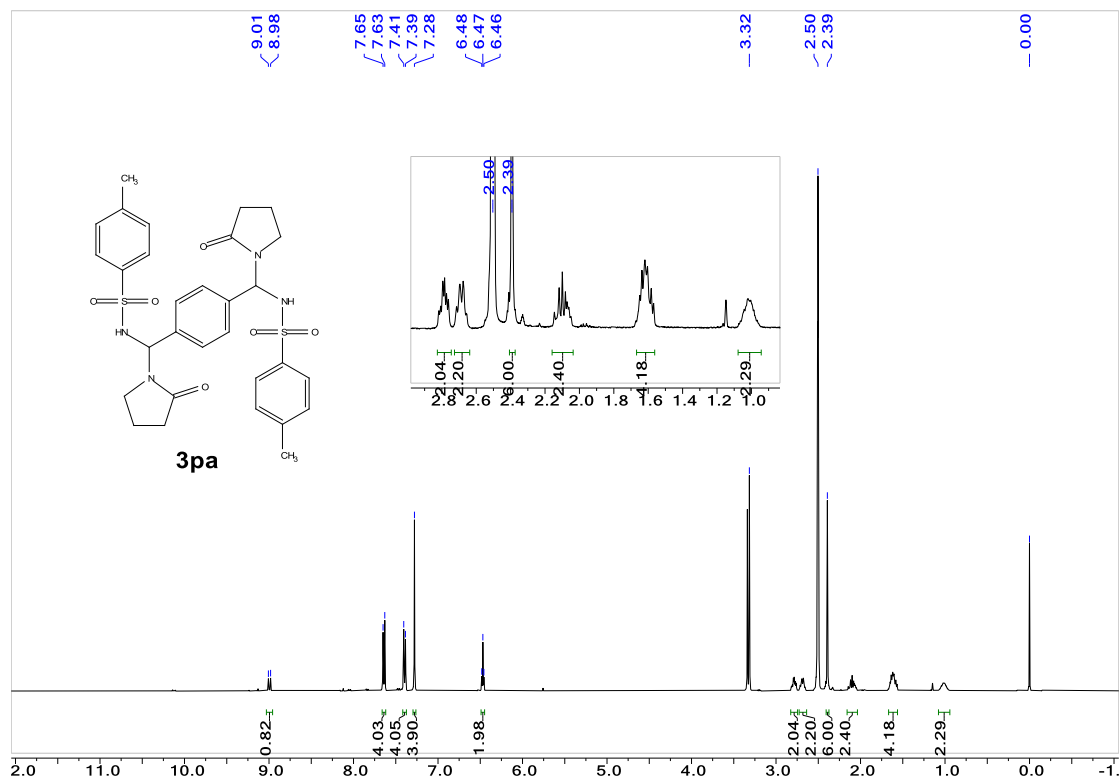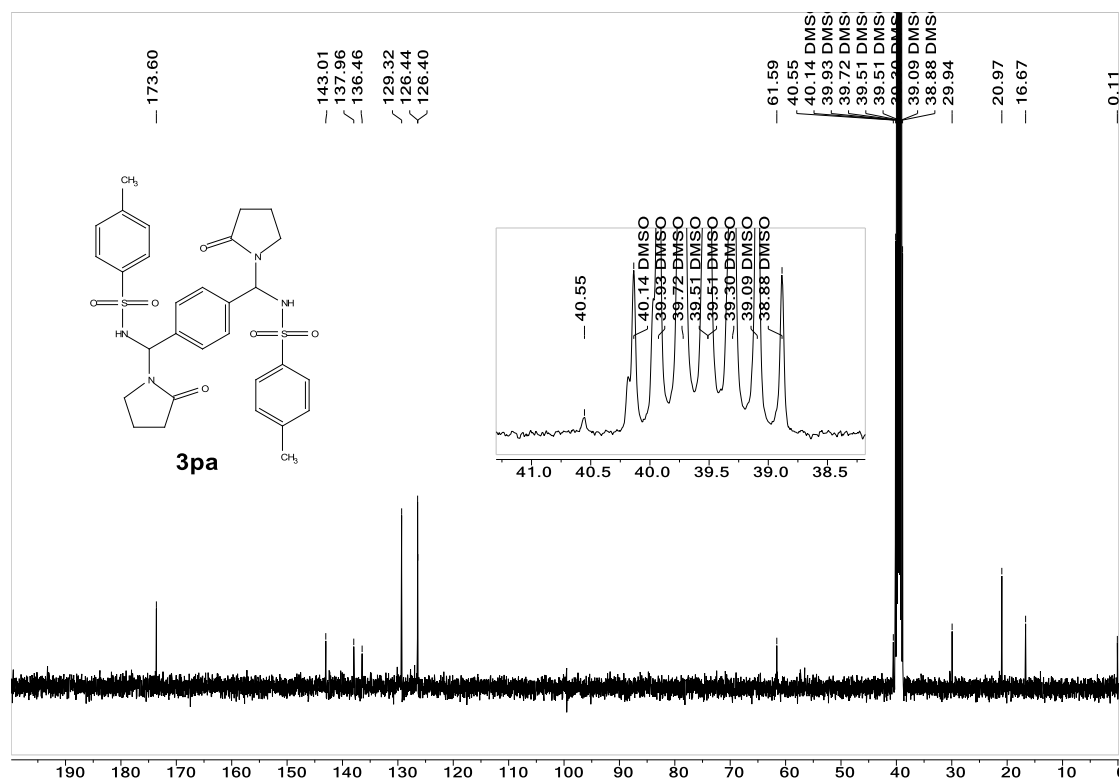

***N*-((4-Nitrophenyl)(2-oxopyrrolidin-1-yl)methyl)benzenesulfonamide (3ab):**

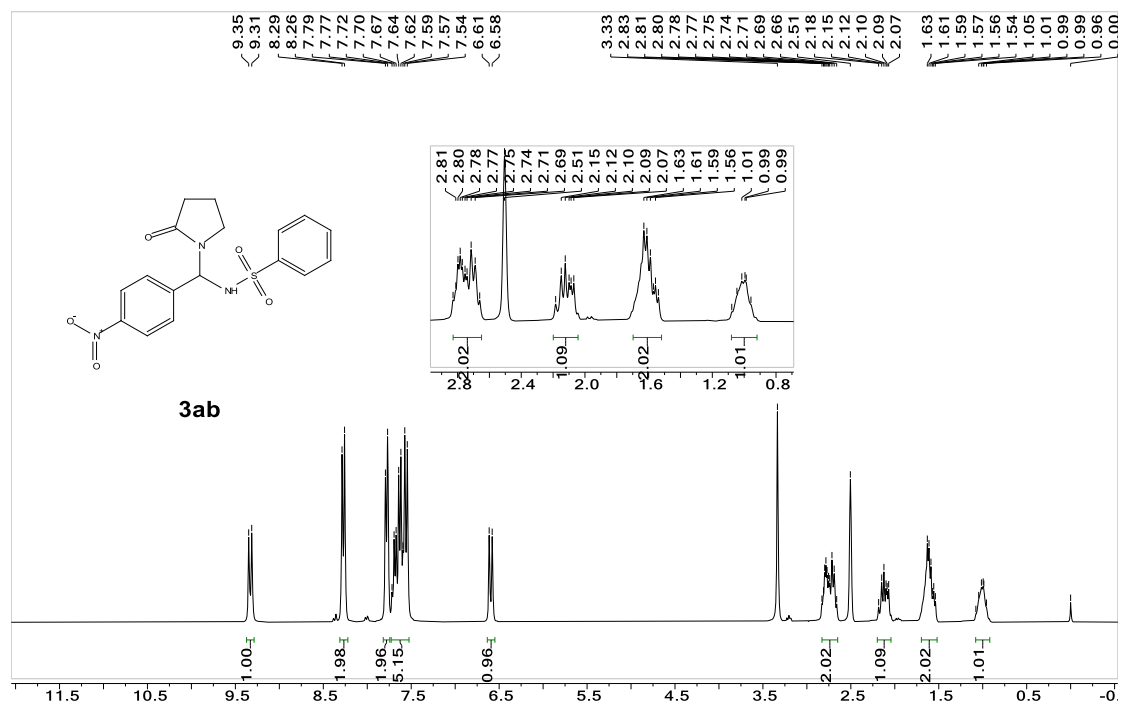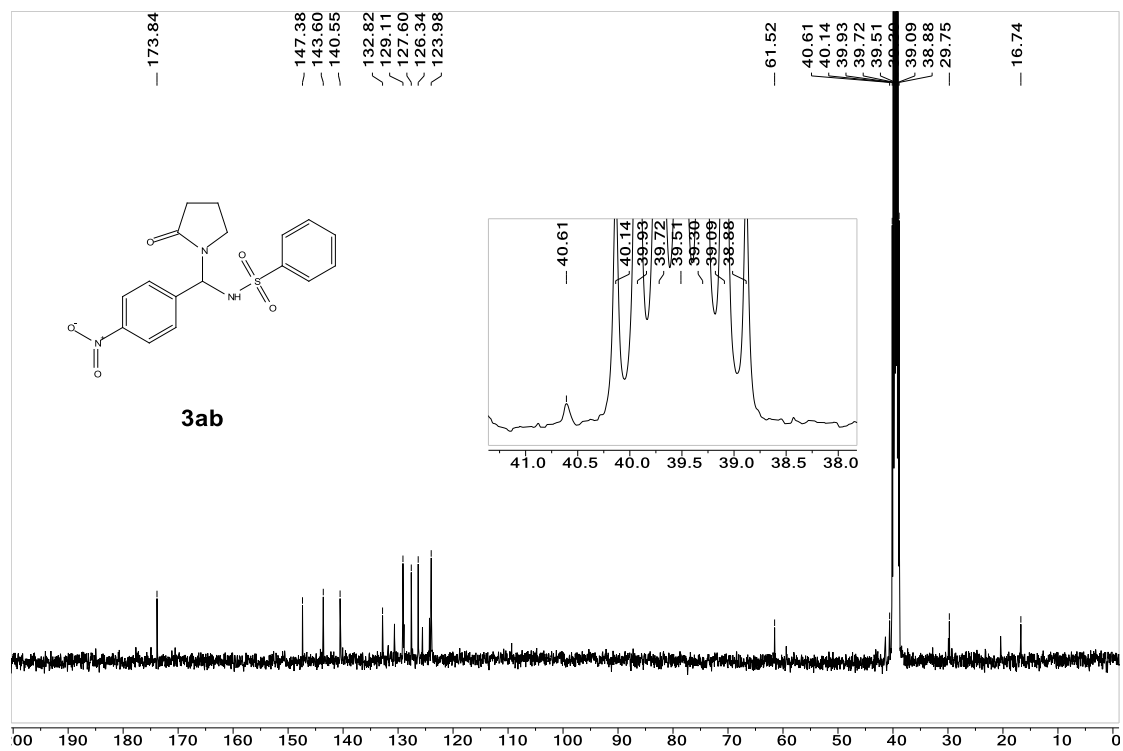

**4-Chloro-N-((4-nitrophenyl)(2-oxopyrrolidin-1-yl)methyl)benzenesulfonamide (3ac):**

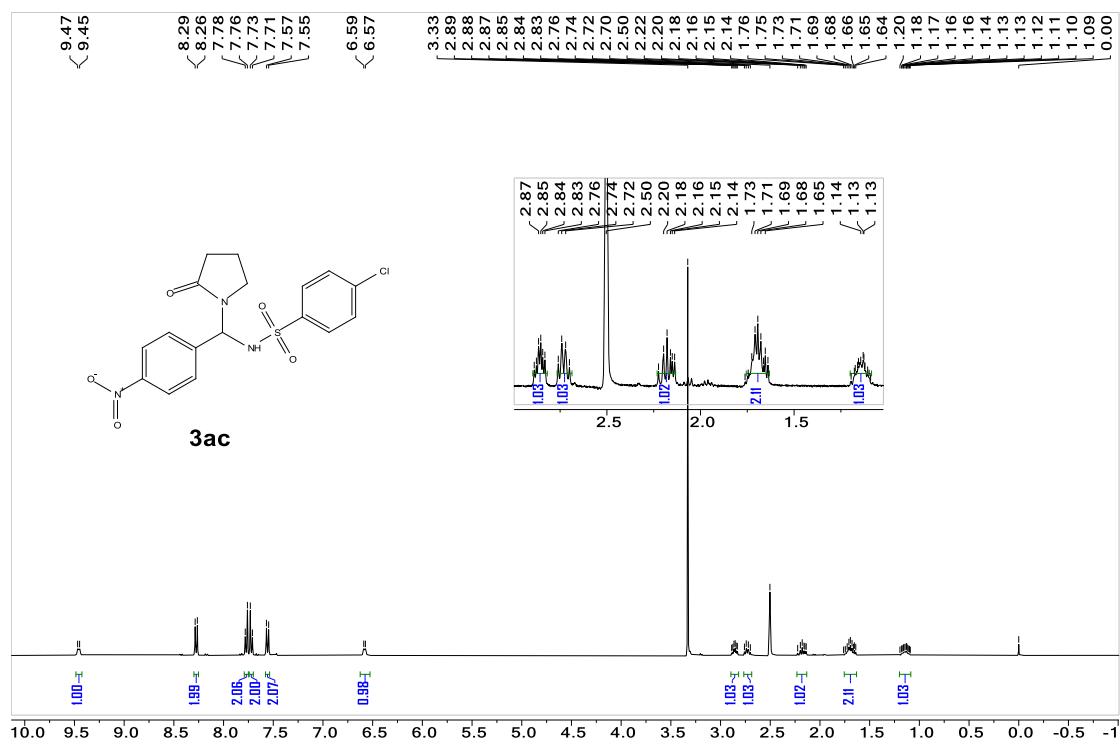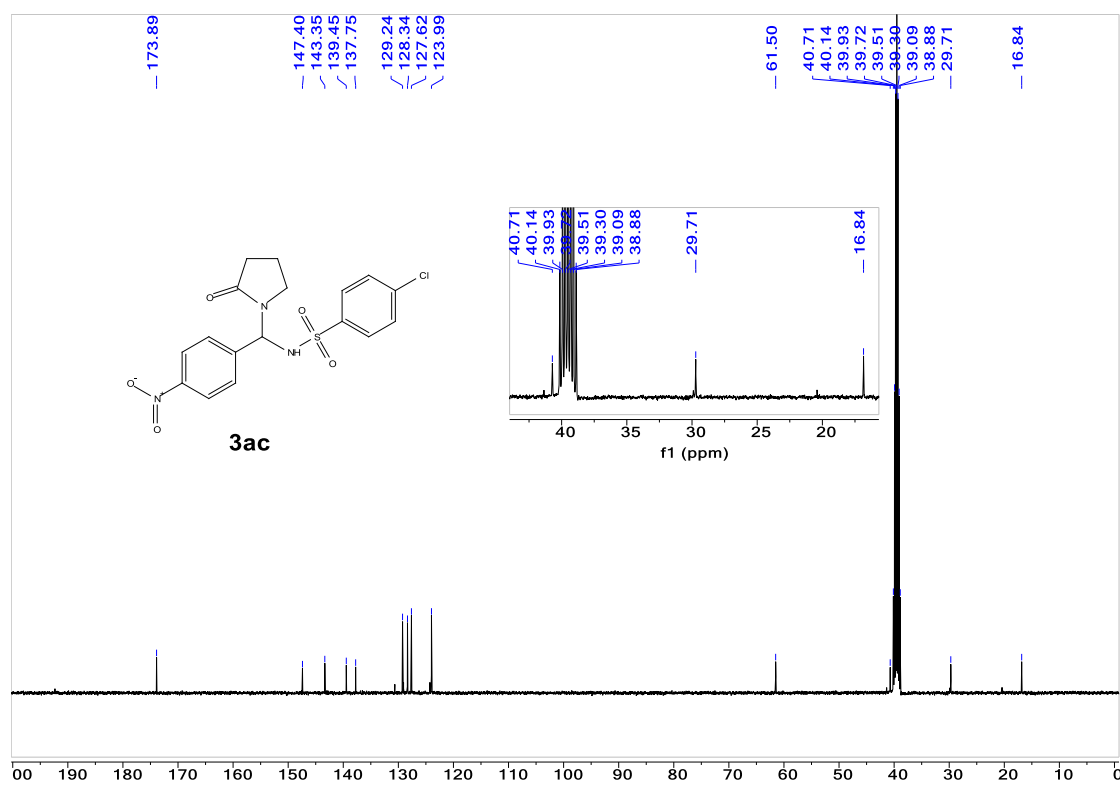



**4-Bromo-N-((4-nitrophenyl)(2-oxopyrrolidin-1-yl)methyl)benzenesulfonamide (3ad):**

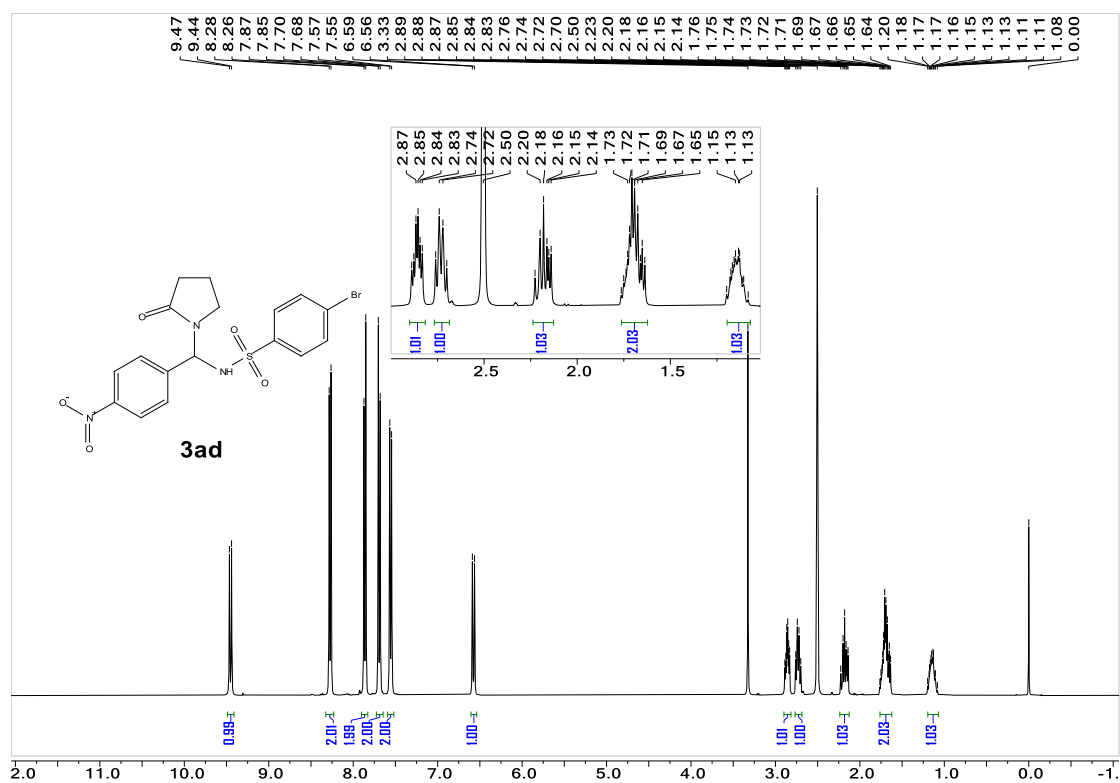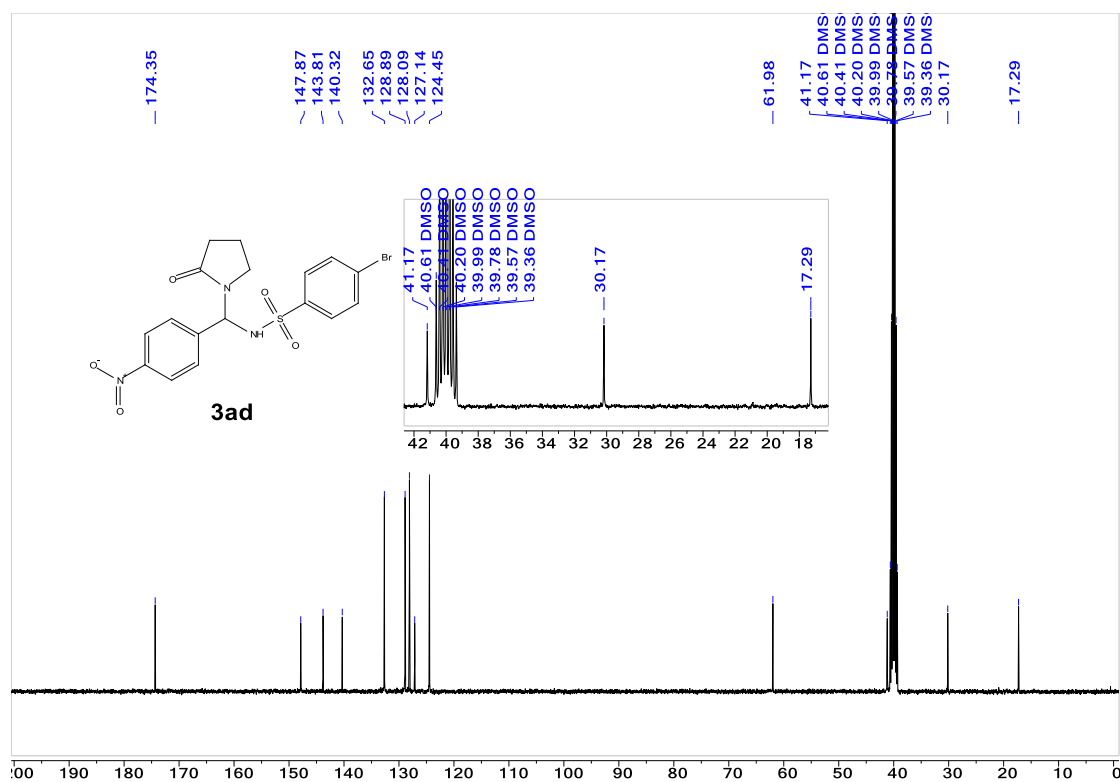

***N*-((4-Nitrophenyl)(2-oxopyrrolidin-1-yl)methyl)thiophene-2-sulfonamide (3af):**

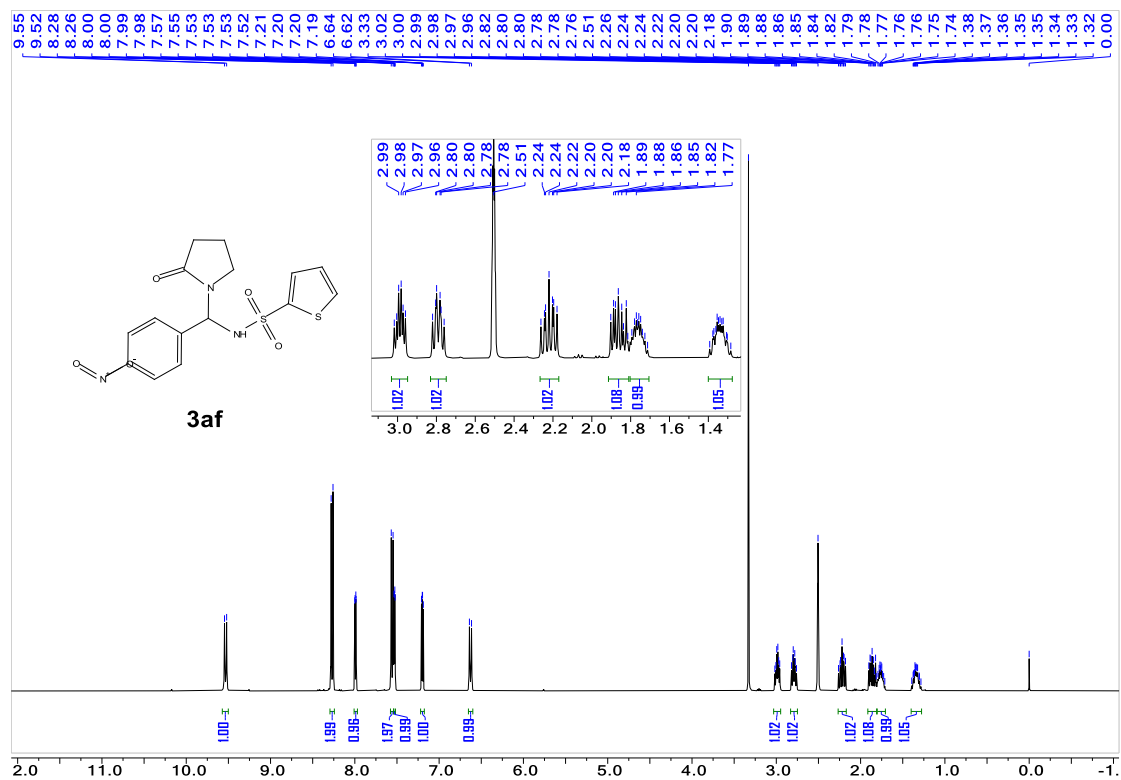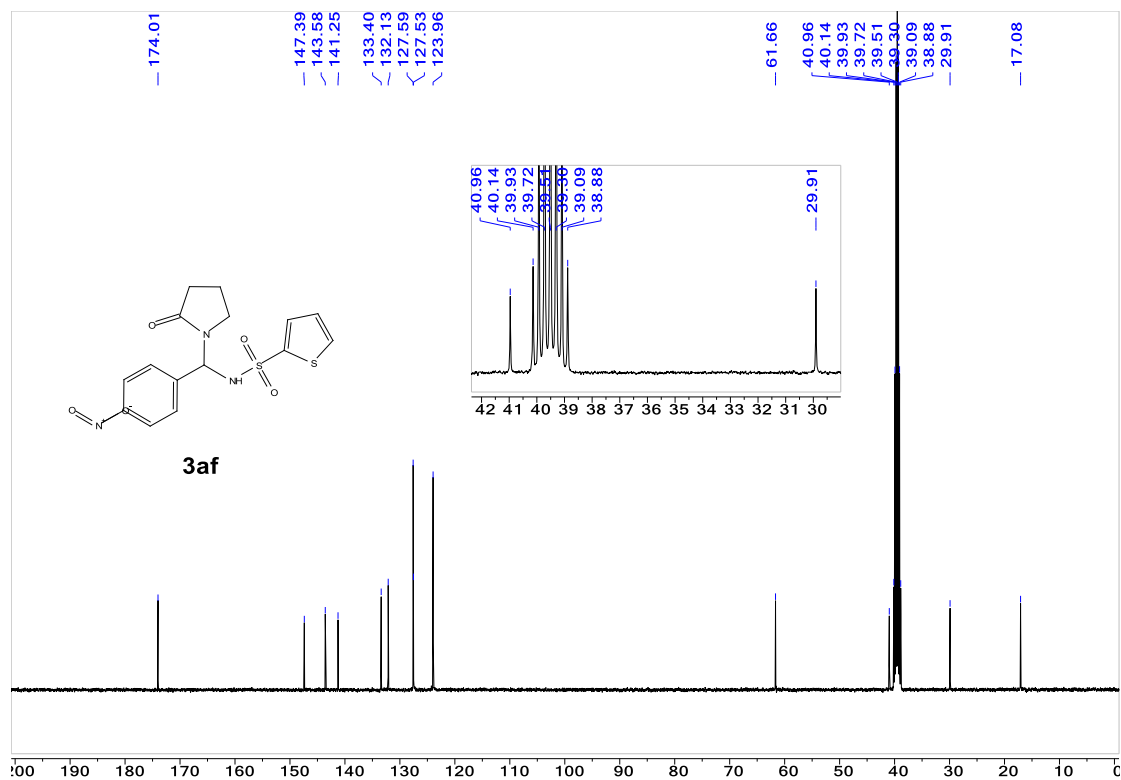

**1-((4-Nitrophenyl)(4-nitrophenylamino)methyl)pyrrolidin-2-one (3ag):**

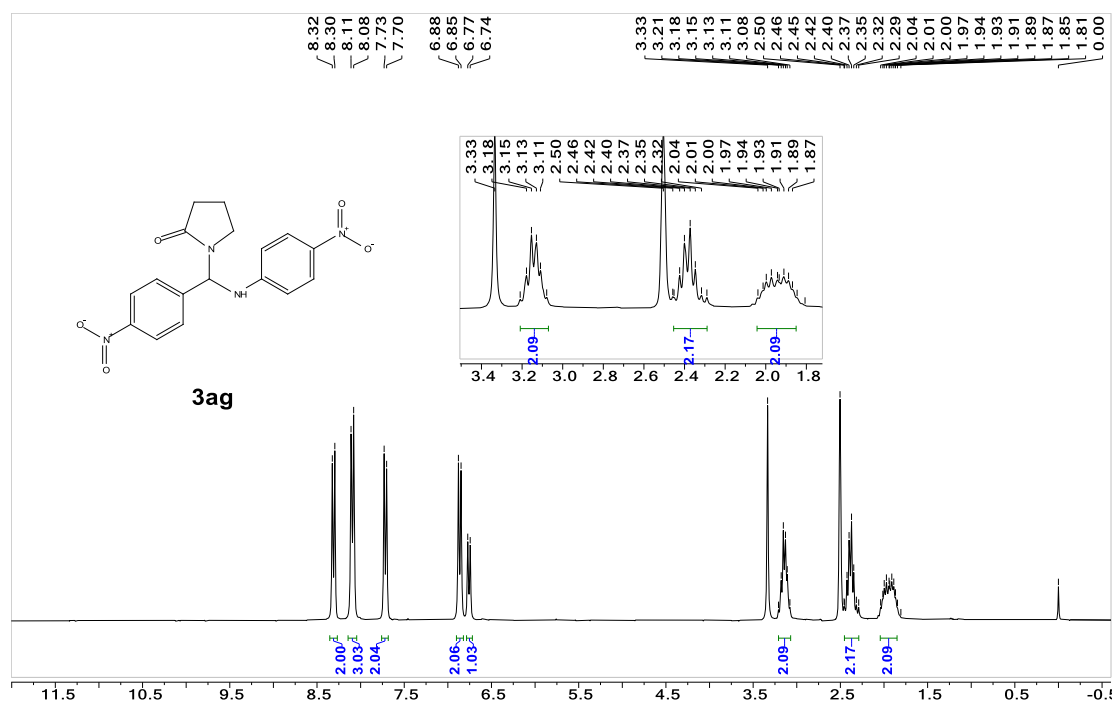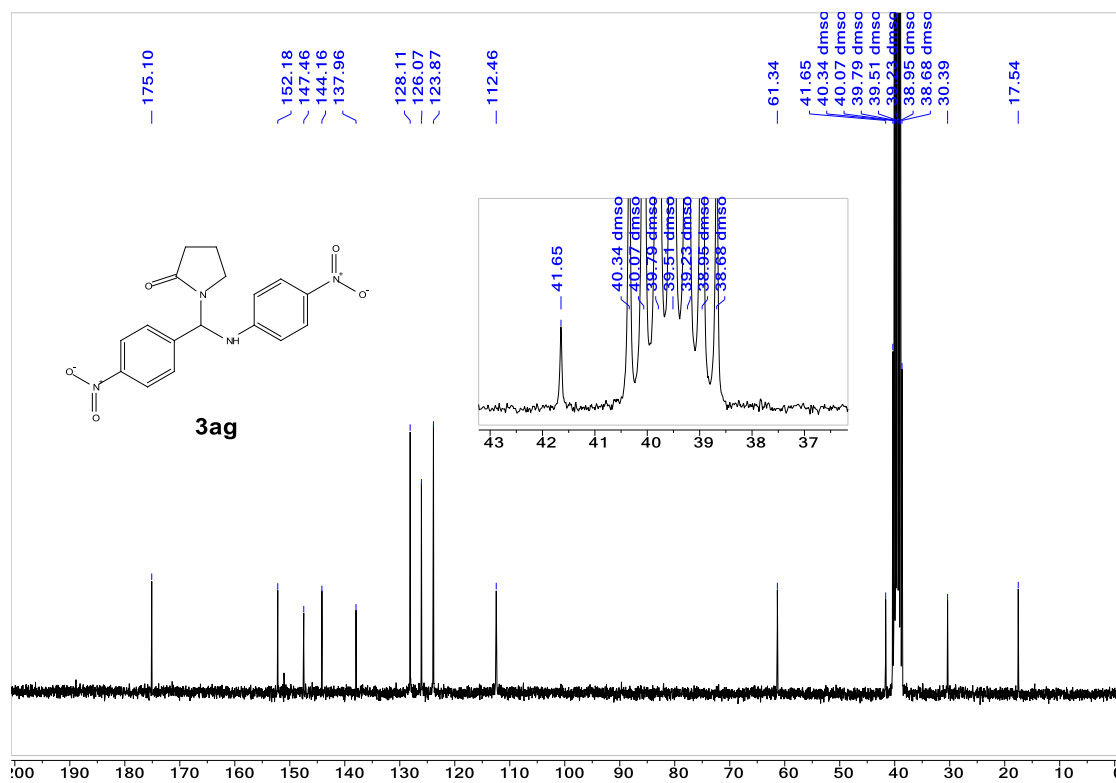

**1-((4-Nitrophenyl)(3-nitrophenylamino)methyl)pyrrolidin-2-one (3ah):**

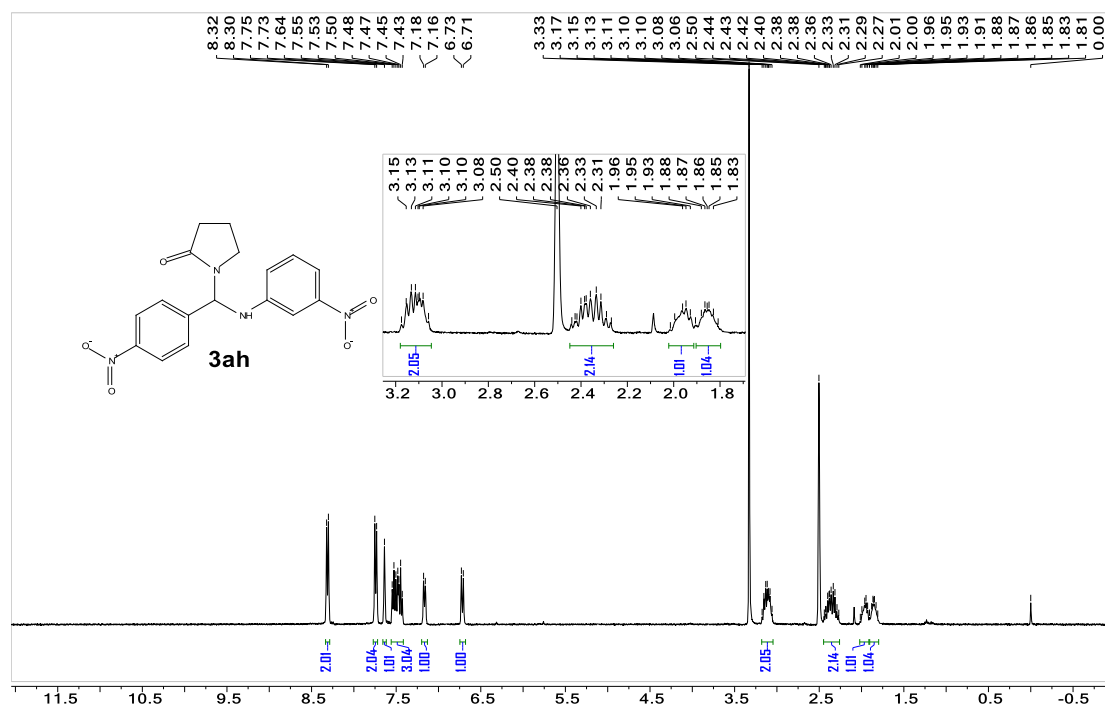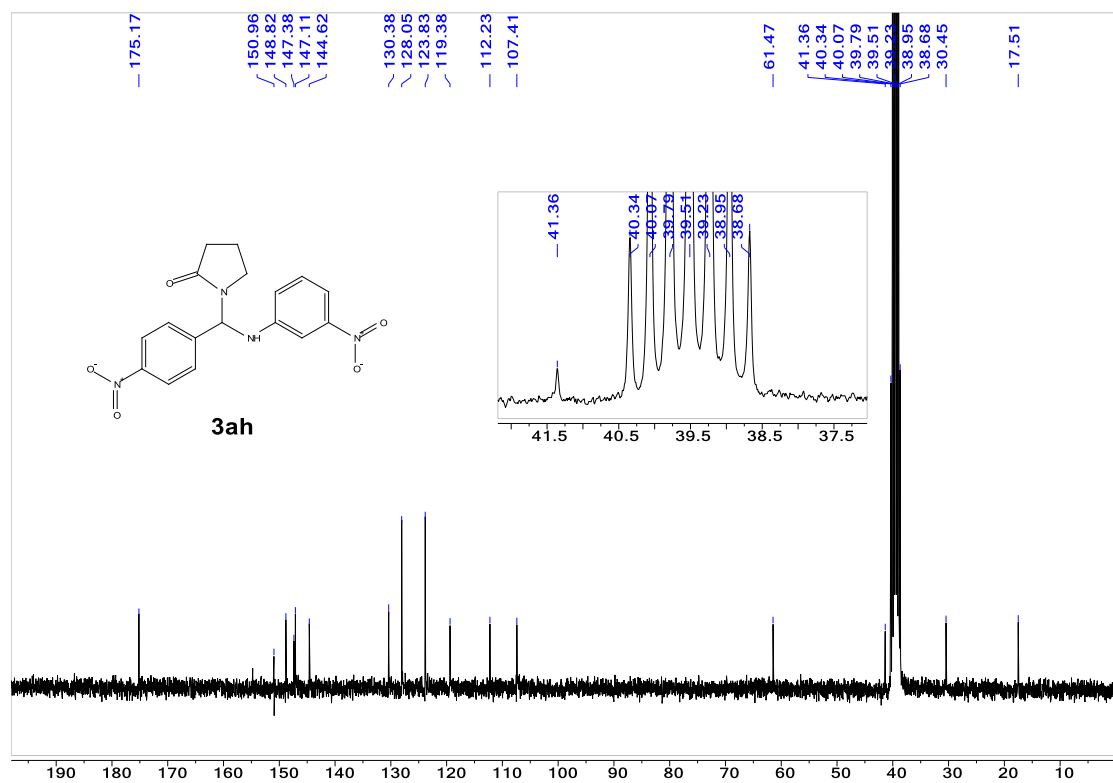

**4-((4-Nitrophenyl)(2-oxopyrrolidin-1-yl)methylamino)benzonitrile (3ai):**

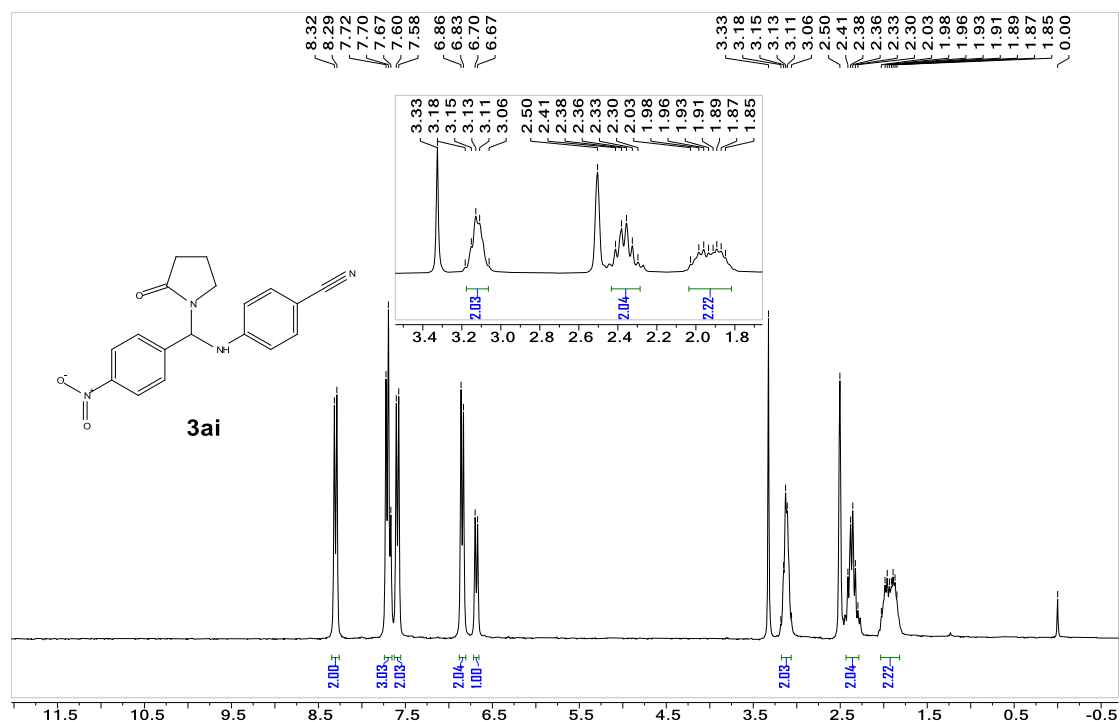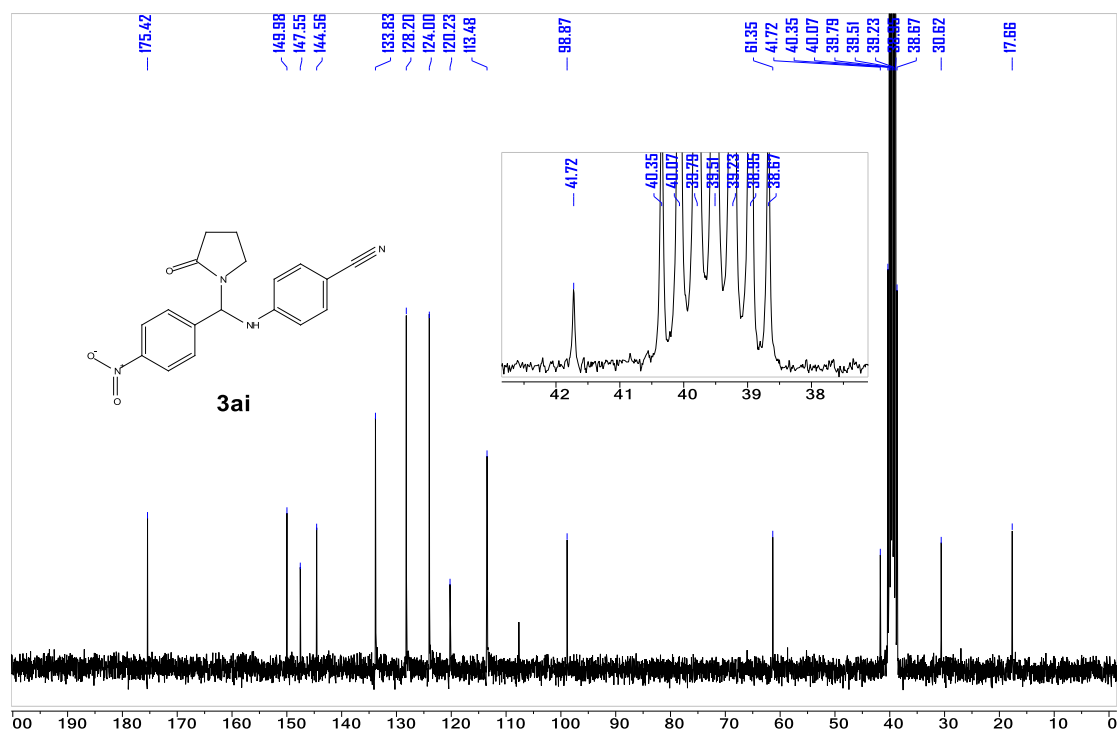

**1-((3,5-Bis(trifluoromethyl)phenylamino)(4-nitrophenyl)methyl)pyrrolidin-2-one (3aj):**

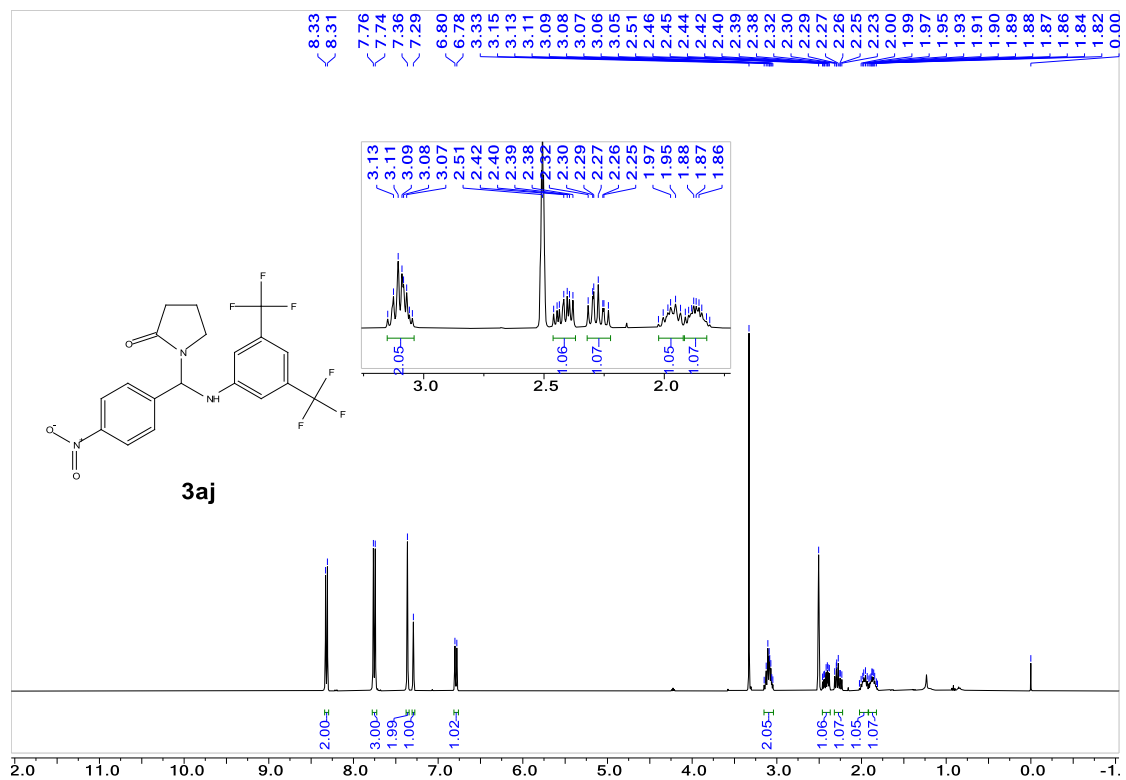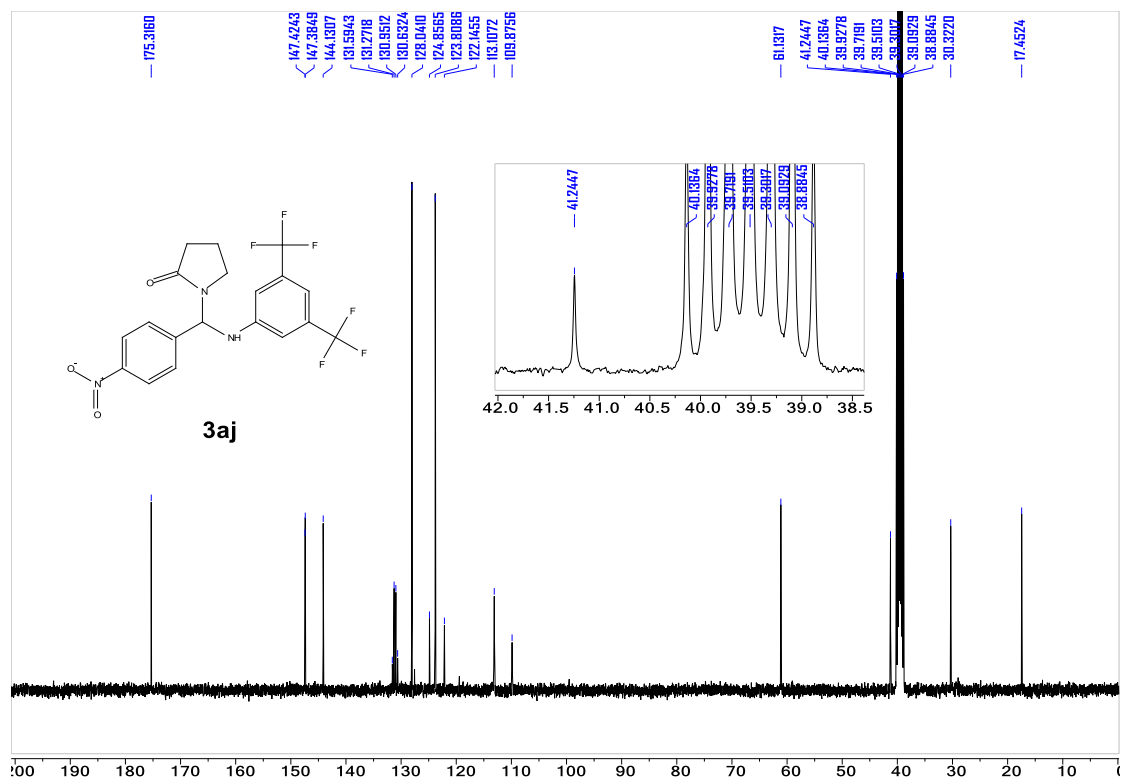

**1,1'-(4-Nitrophenyl)methylene)dipyrrolidin-2-one (3ak):**

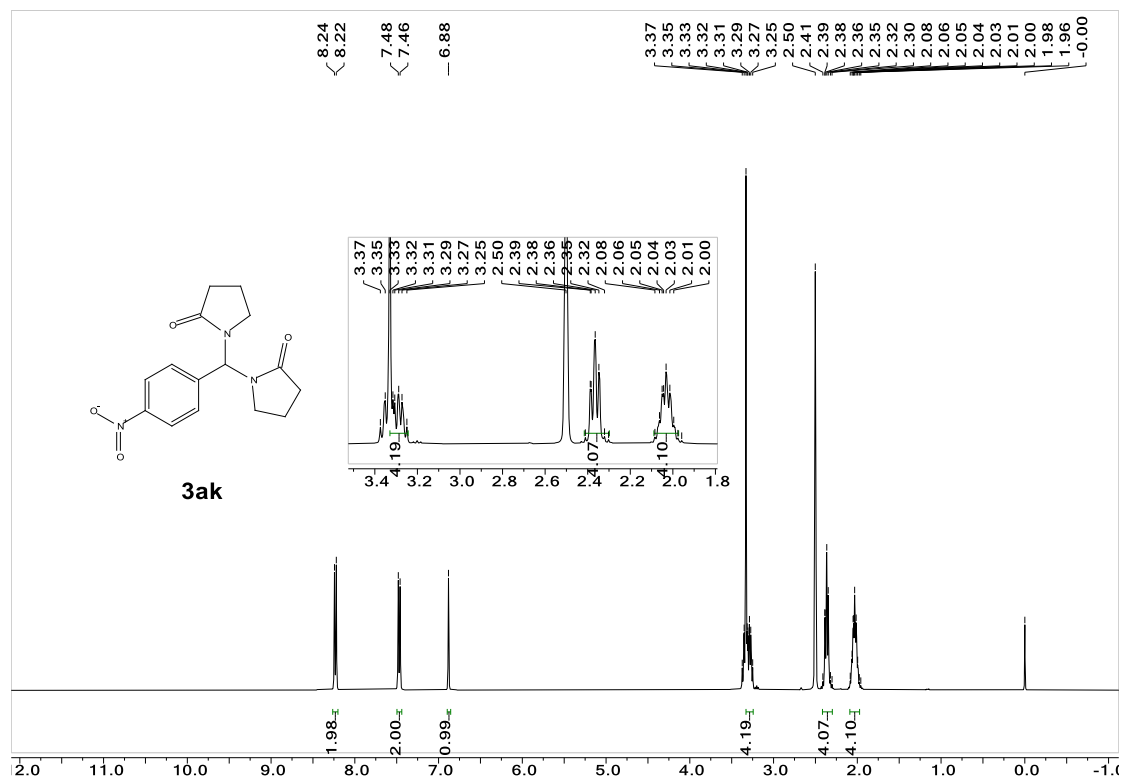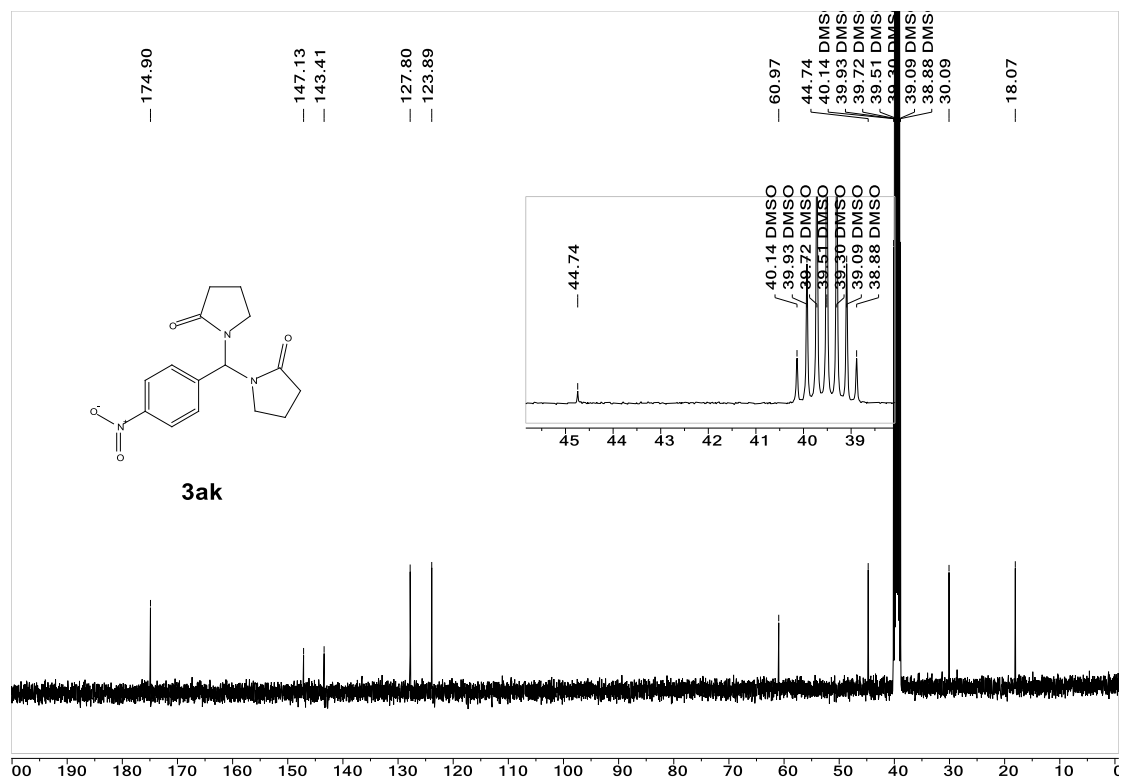

**1-((1*H*-Benzo[*d*][1,2,3]triazol-1-yl)(4-nitrophenyl)methyl)pyrrolidin-2-one (3a1):**

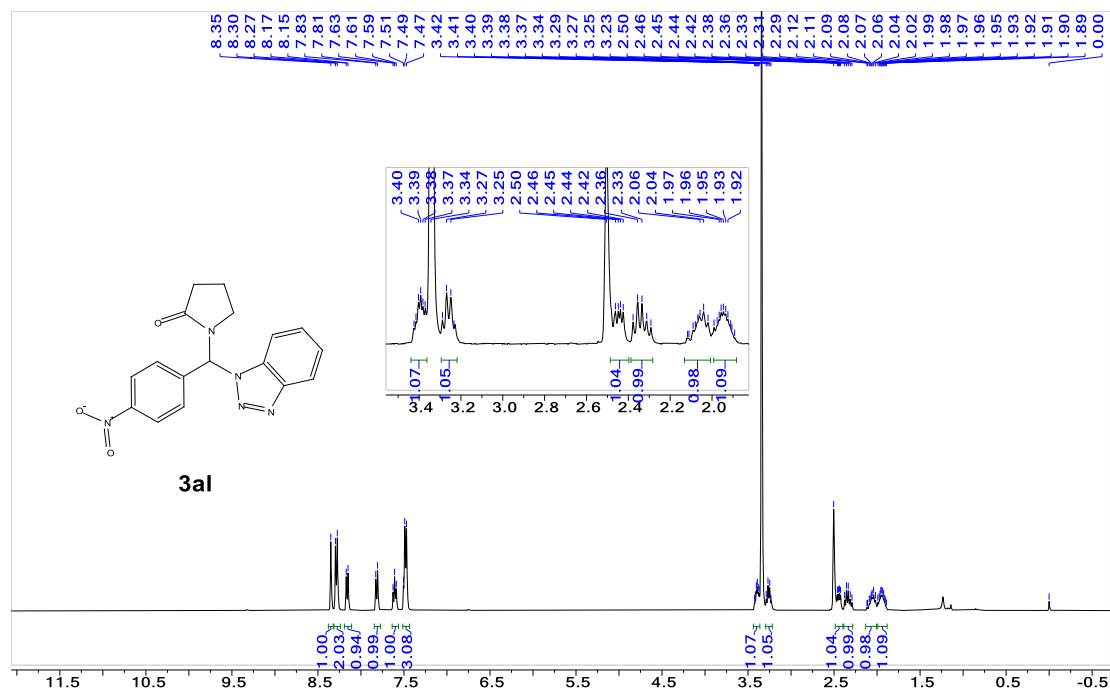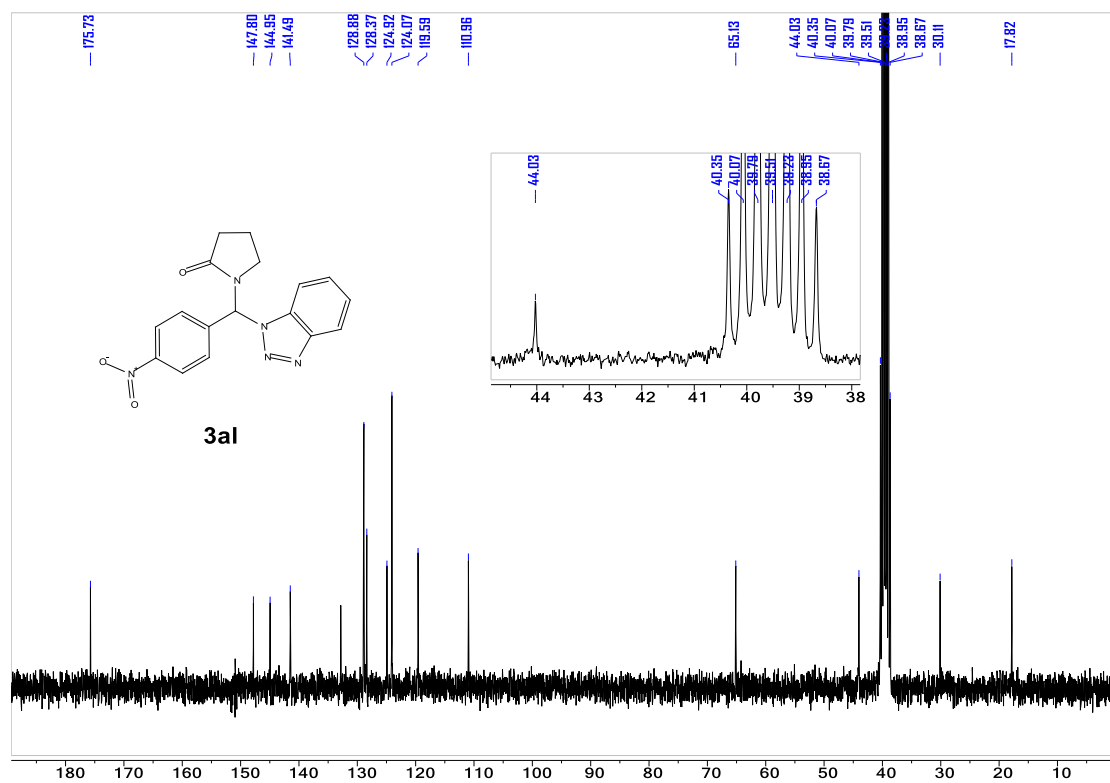



***N,N'*-((4-Nitrophenyl)methylene)dibenzamide (3am):**

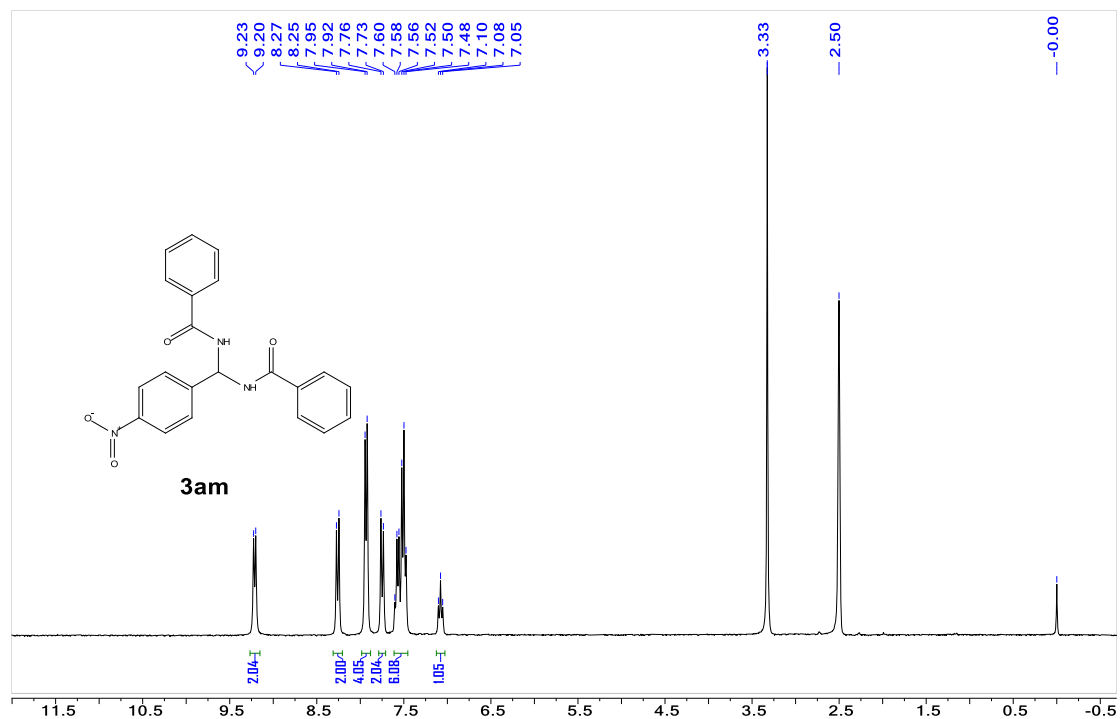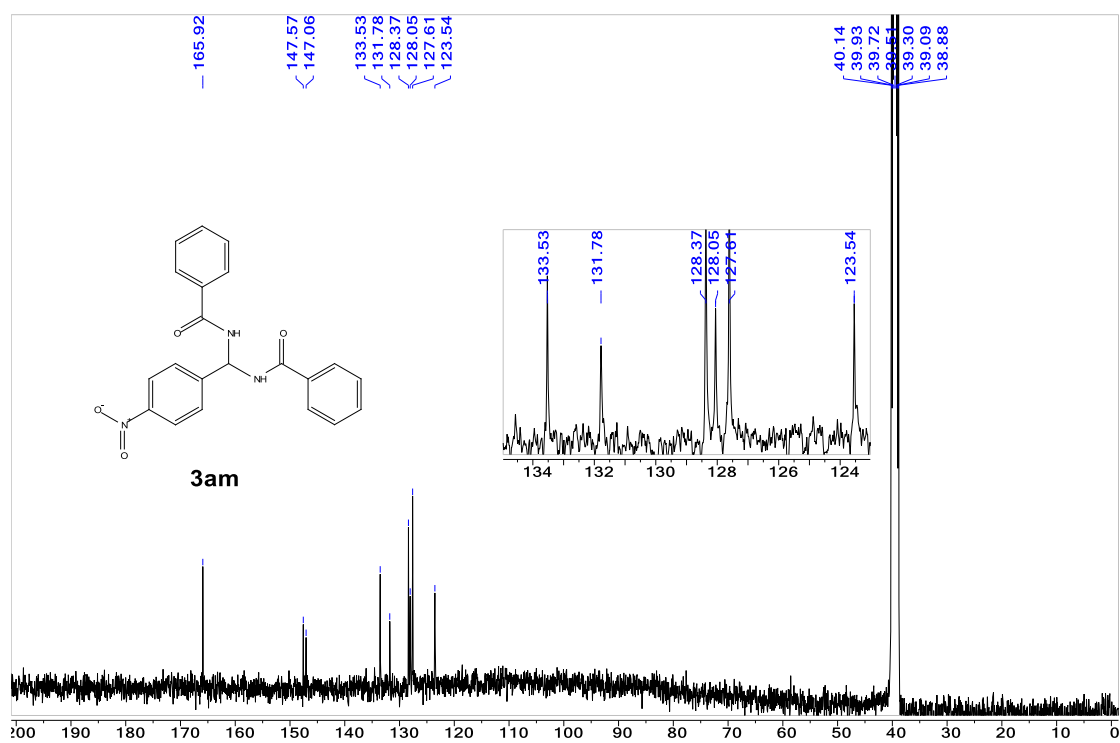

1-((1*H*-Indol-3-yl)(4-nitrophenyl)methyl)pyrrolidin-2-one (5aa):

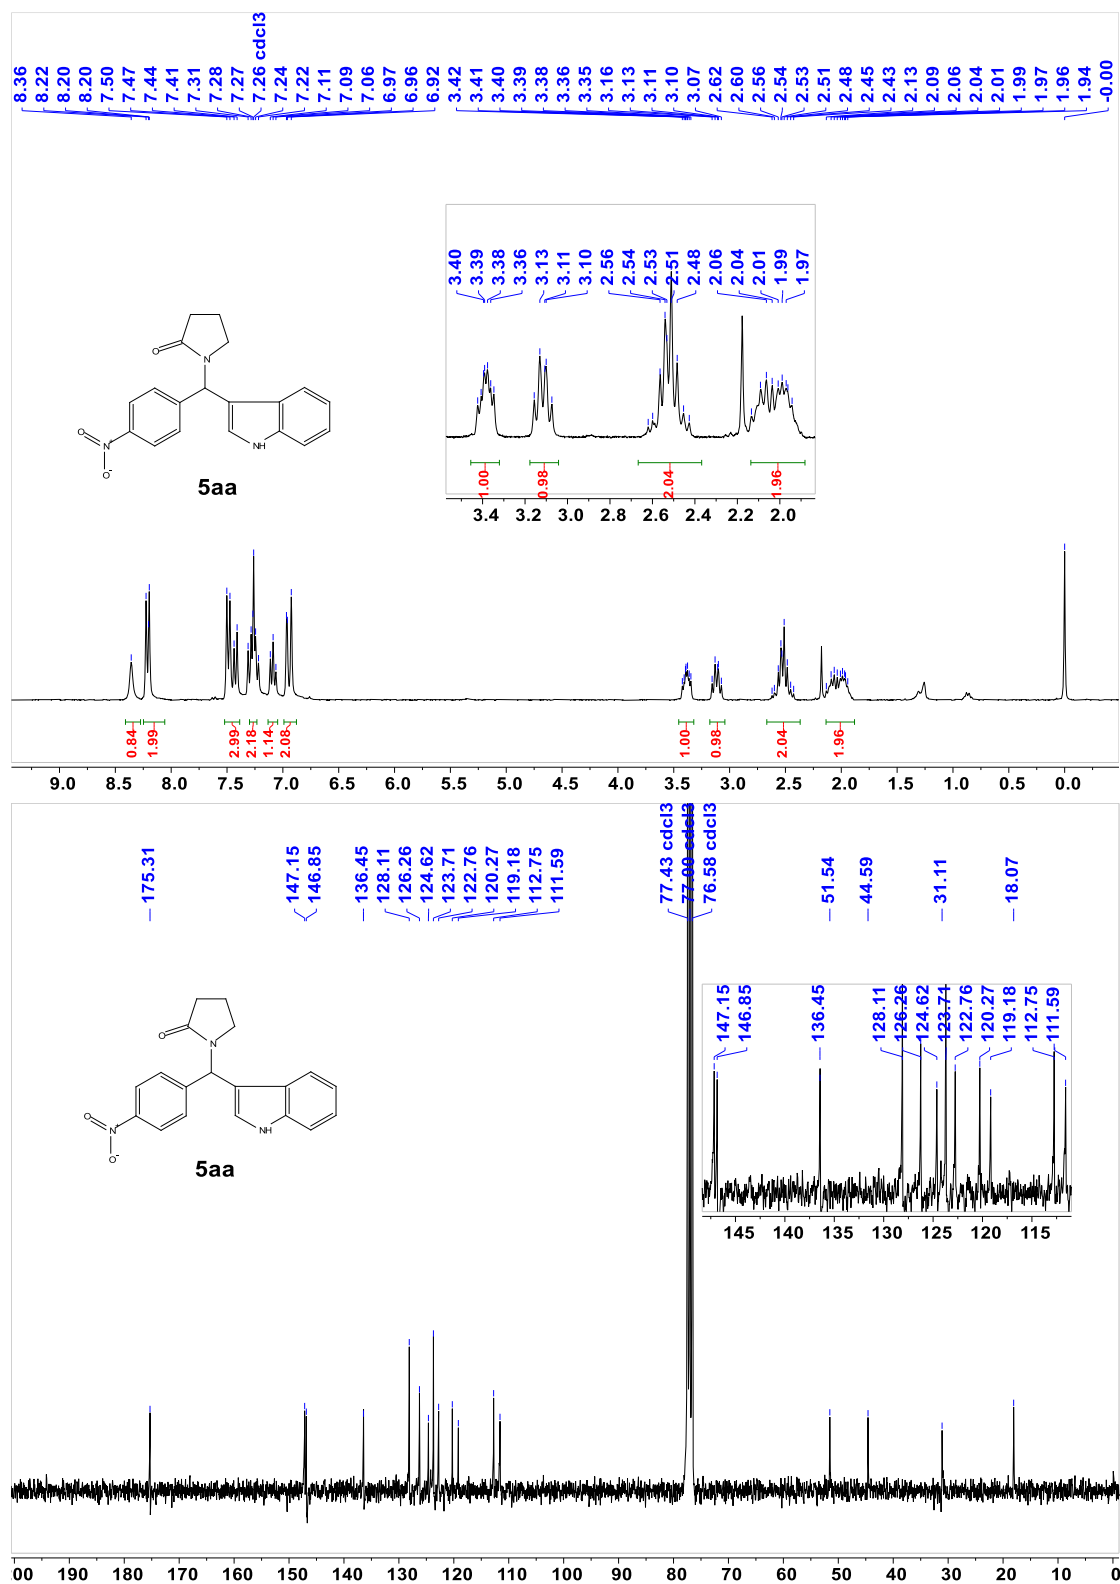

1-((1-Methyl-1*H*-indol-3-yl)(4-nitrophenyl)methyl)pyrrolidin-2-one (5ab):

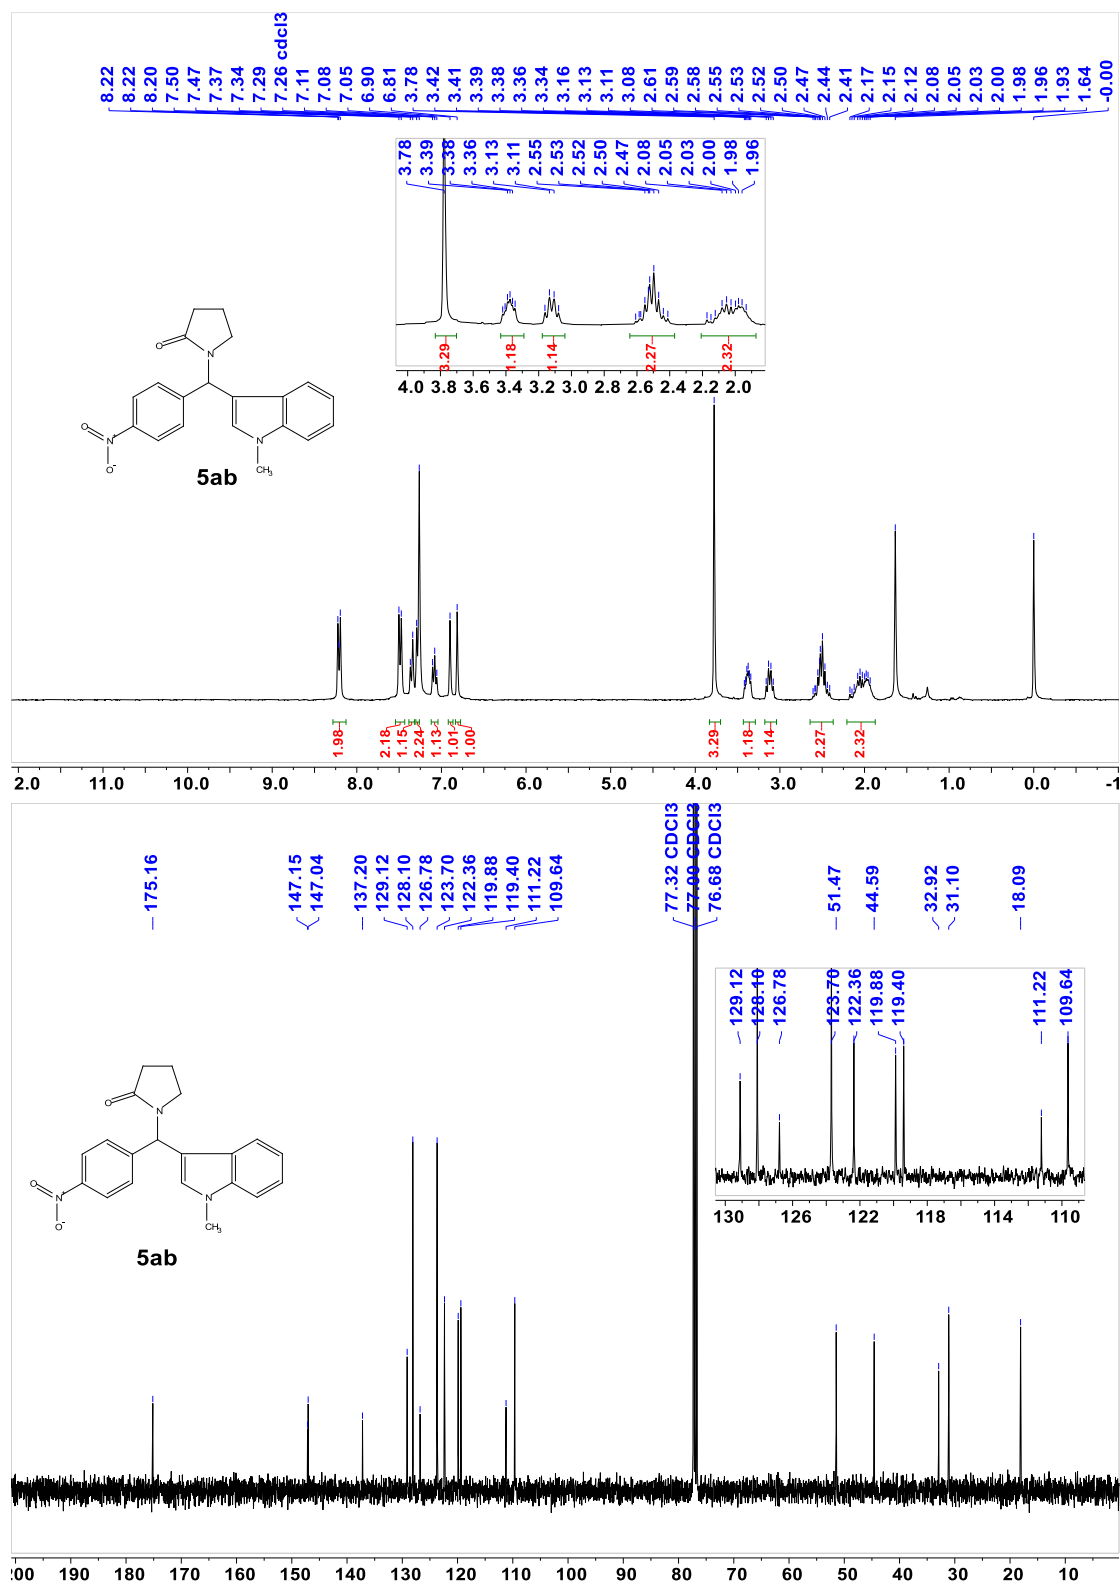



1-((5-Methoxy-1*H*-indol-3-yl)(4-nitrophenyl)methyl)pyrrolidin-2-one (**5ad**):

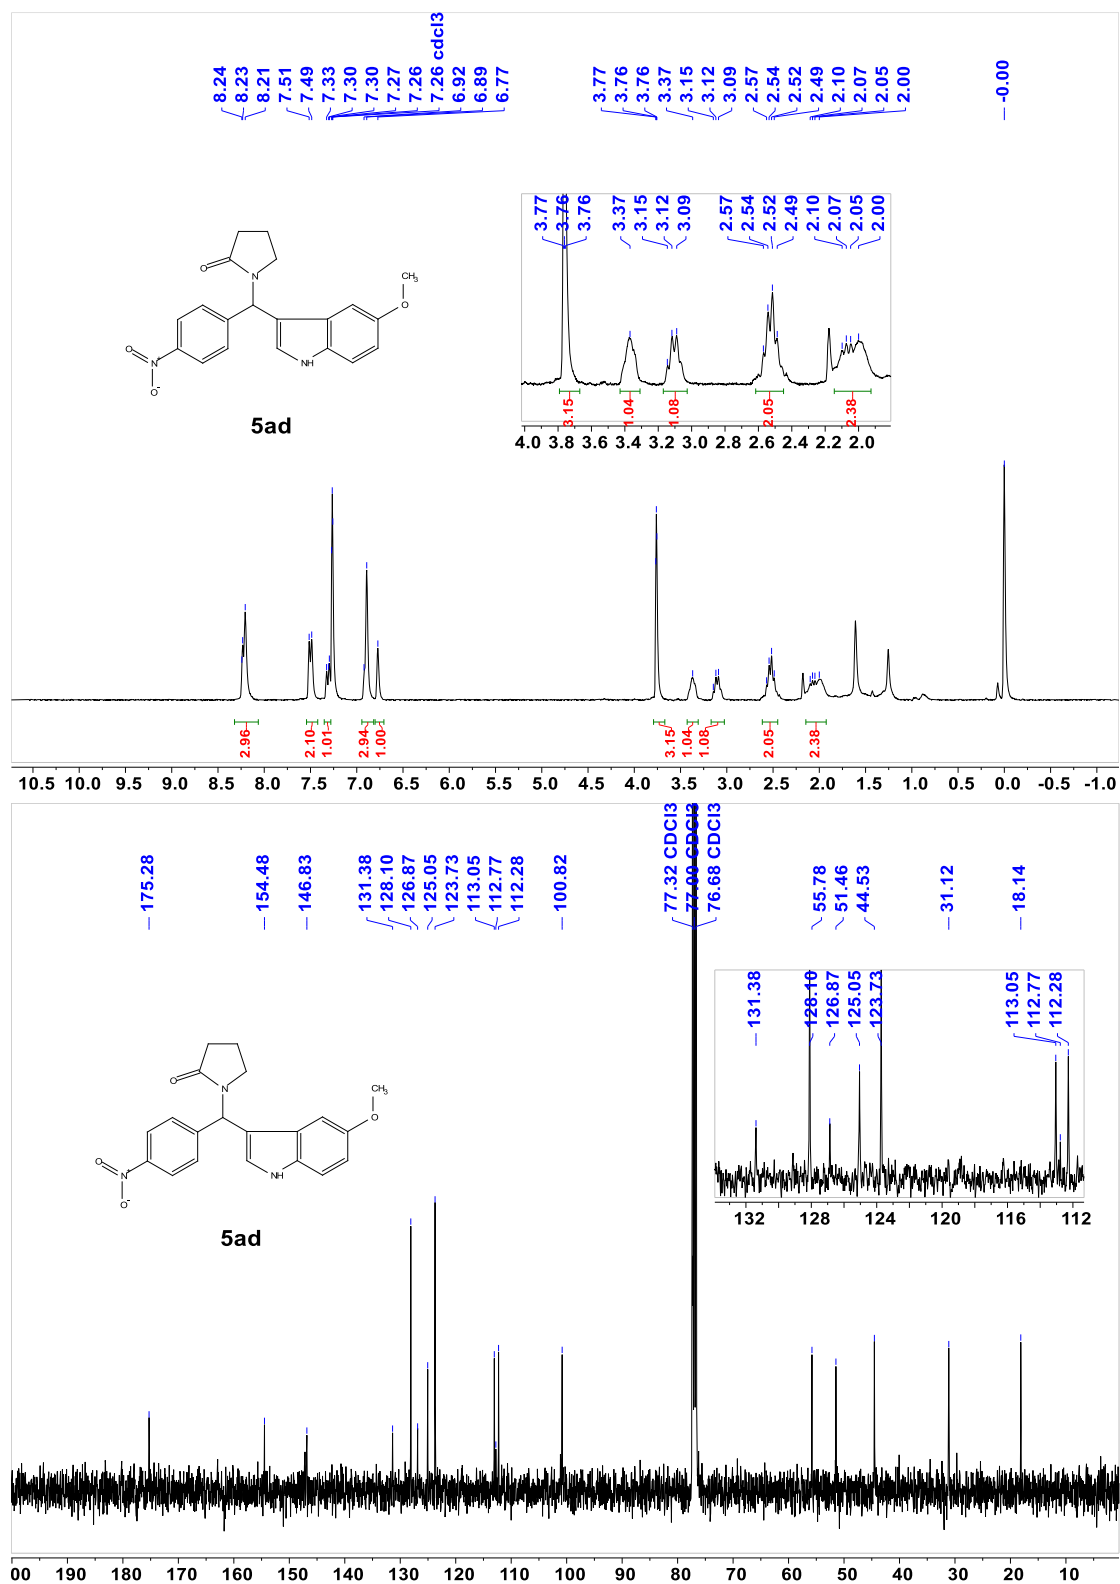

1-((6-Methyl-1*H*-indol-3-yl)(4-nitrophenyl)methyl)pyrrolidin-2-one (5ae):

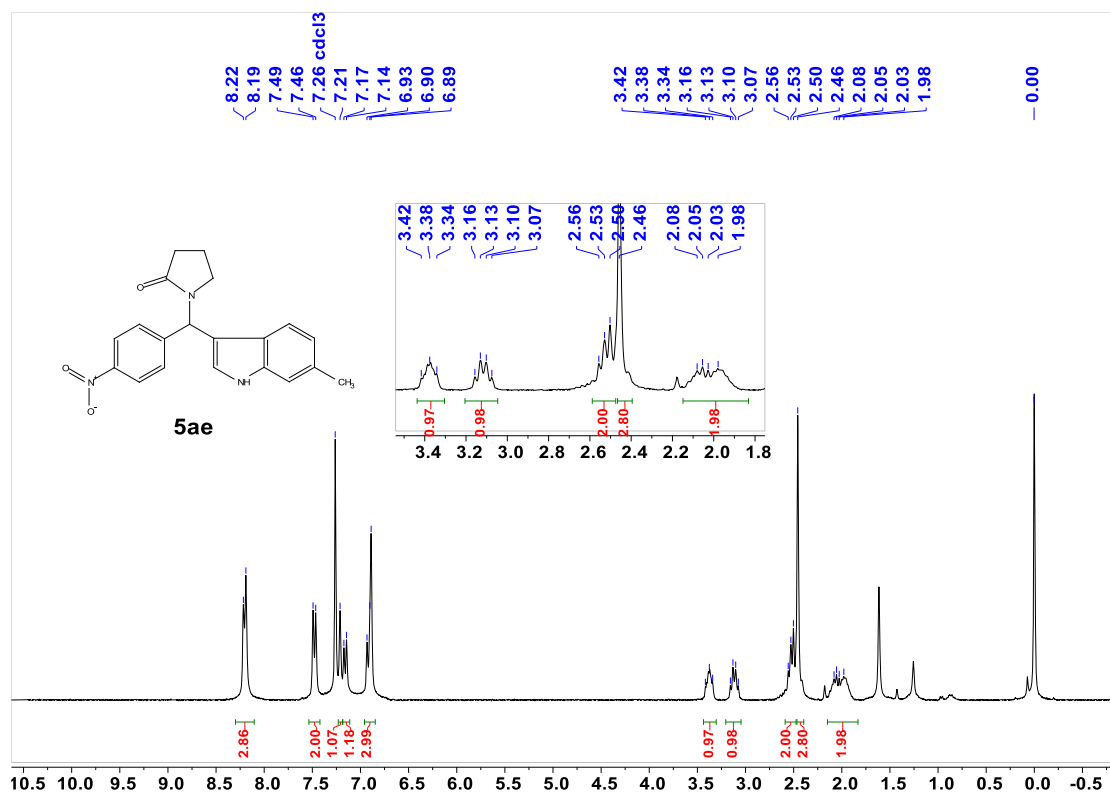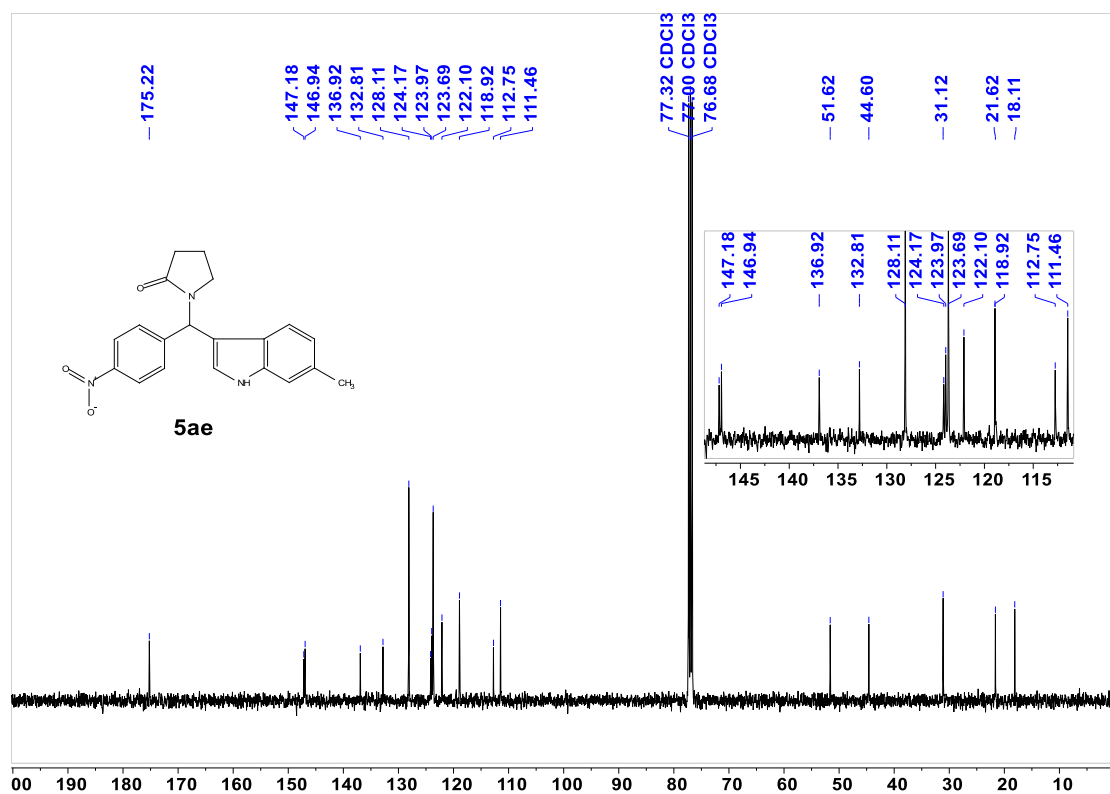



3-((4-Nitrophenyl)(2-oxopyrrolidin-1-yl)methyl)pentane-2,4-dione (7aa):

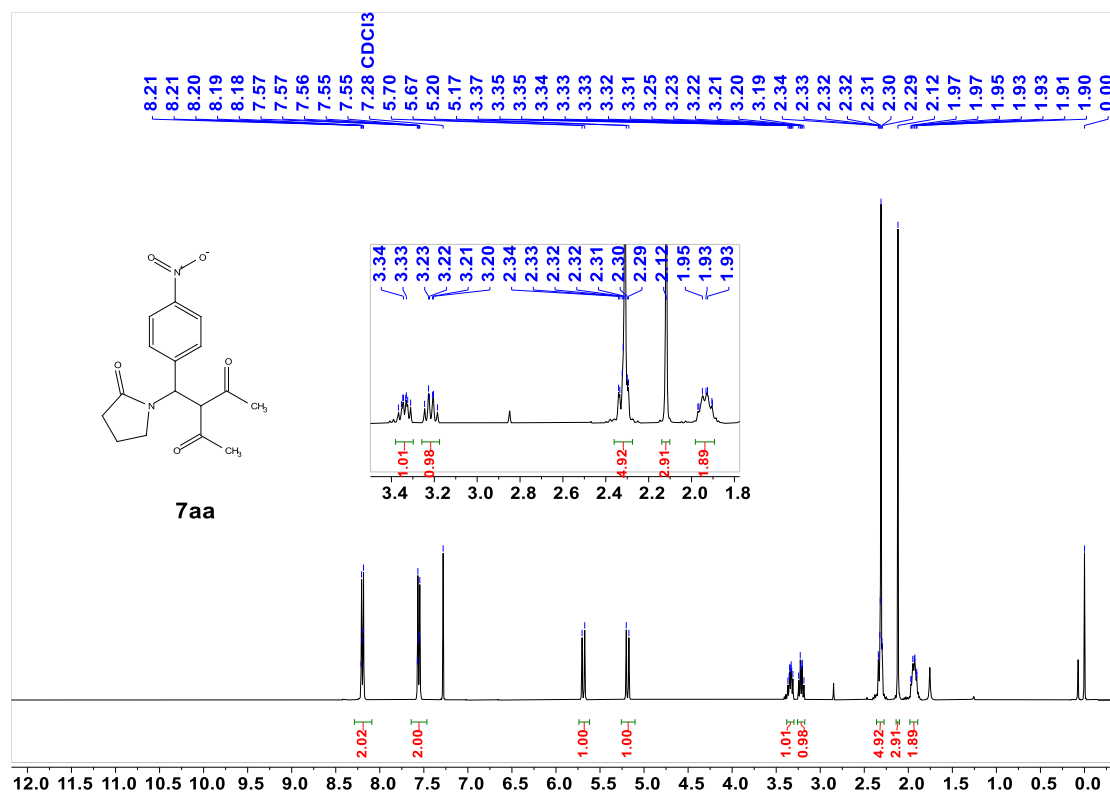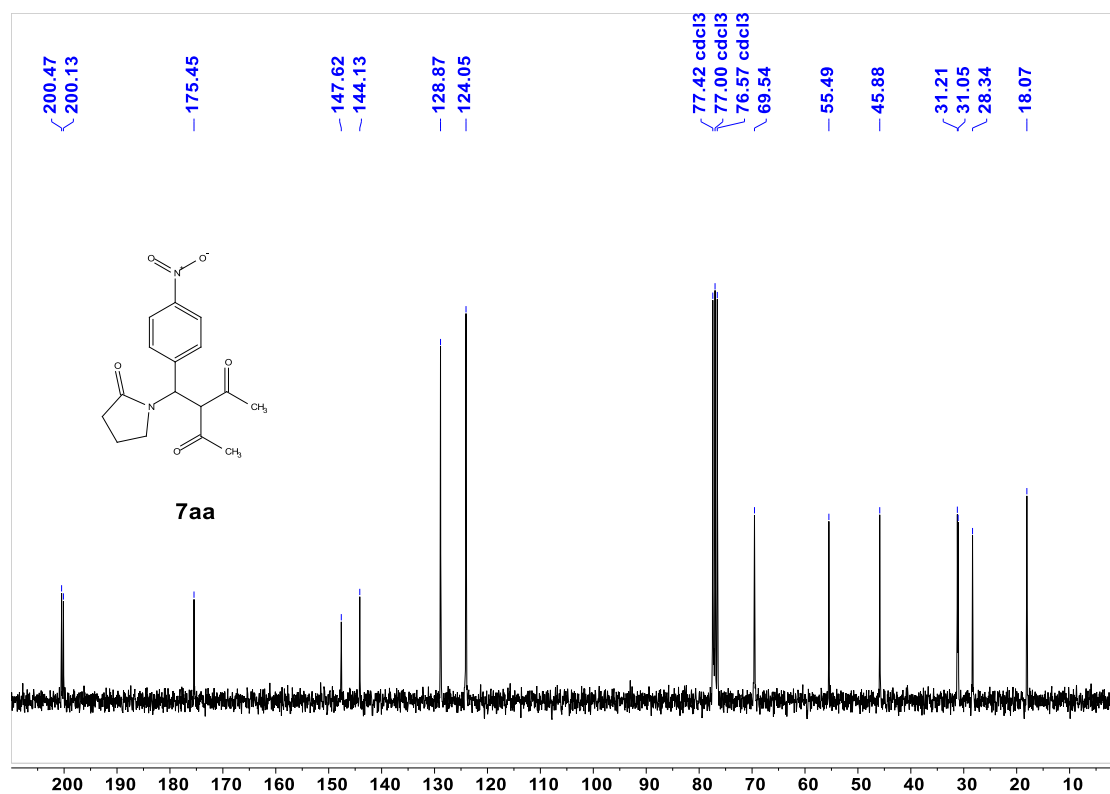



2-((4-Nitrophenyl)(2-oxopyrrolidin-1-yl)methyl)-1,3-diphenylpropane-1,3-dione (7ab):

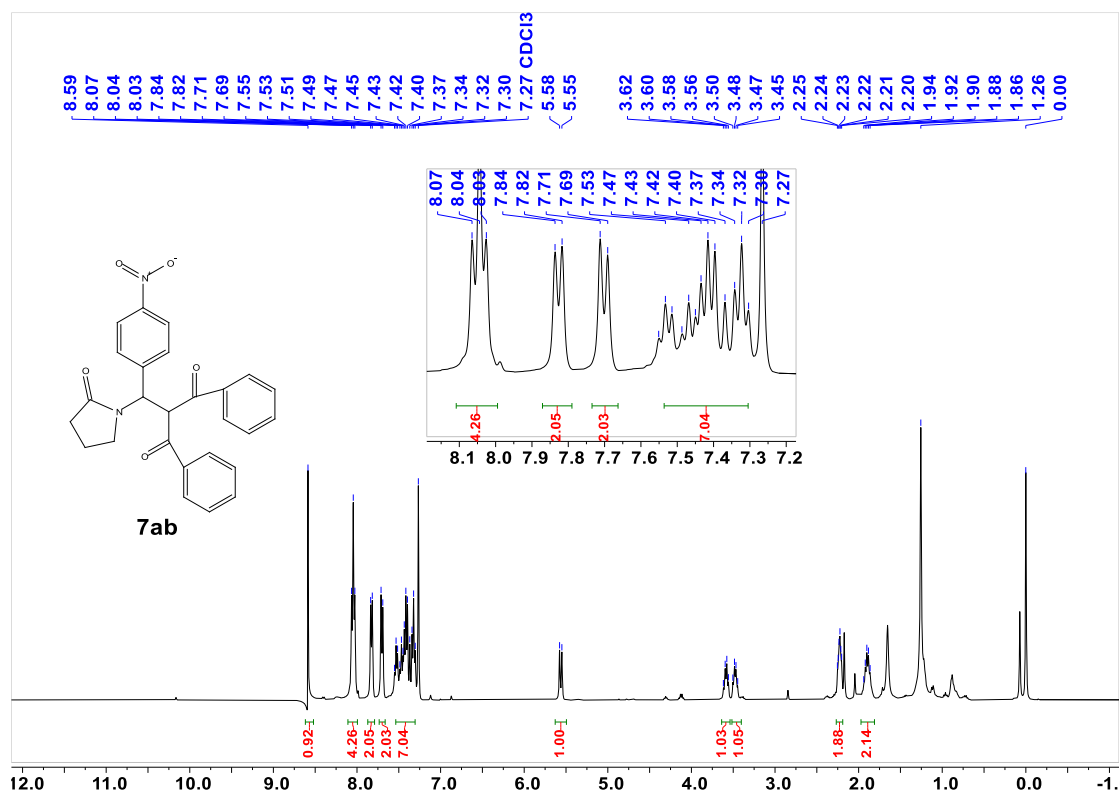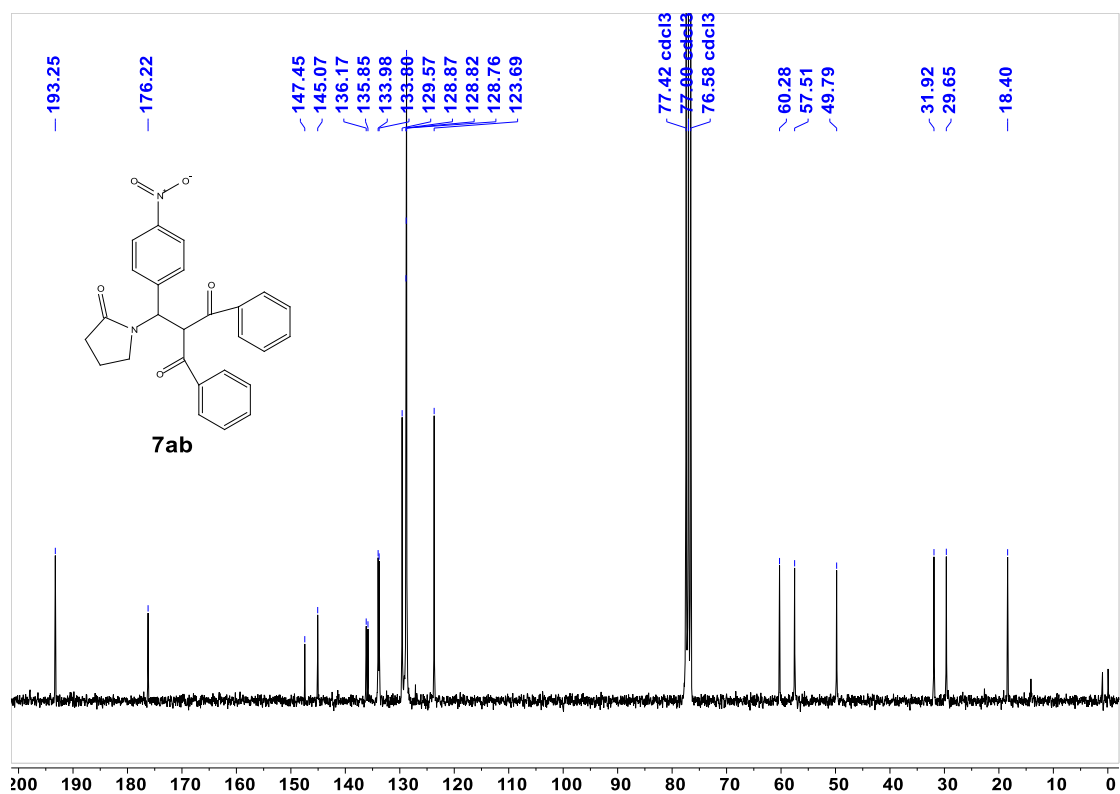

**2-((4-Nitrophenyl)(2-oxopyrrolidin-1-yl)methyl)-1-phenylbutane-1,3-dione (7ac):**

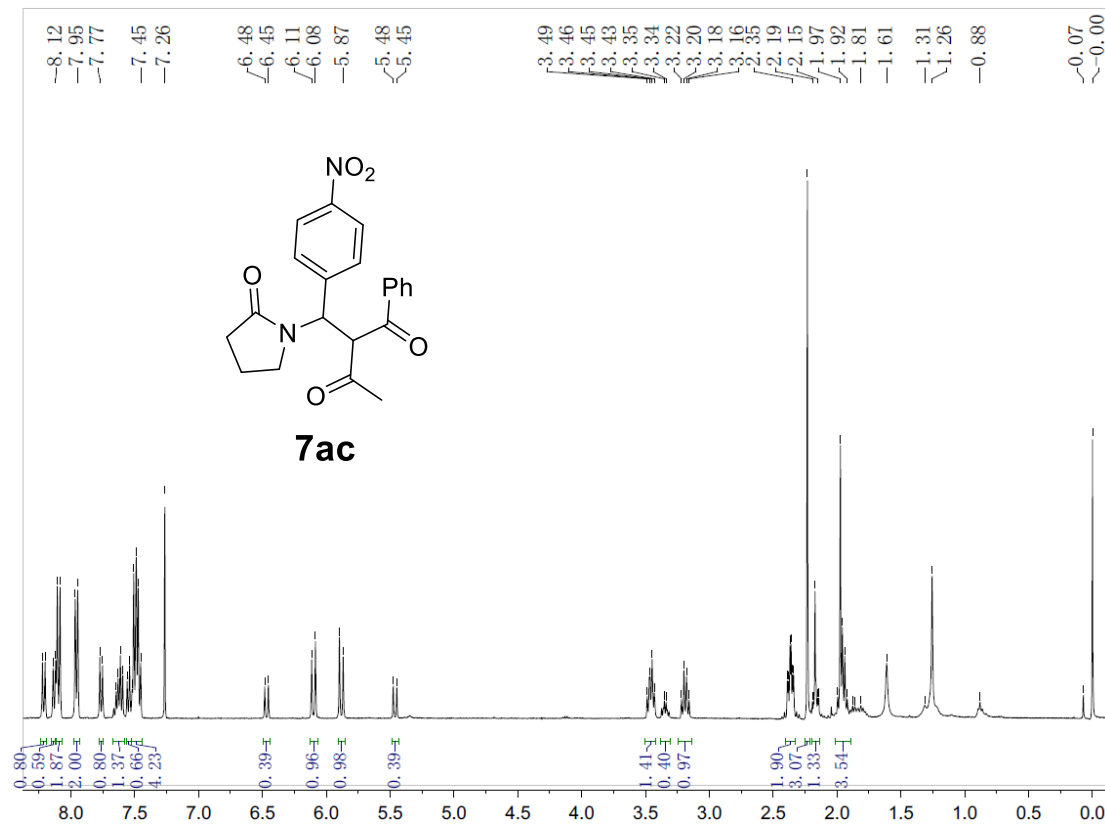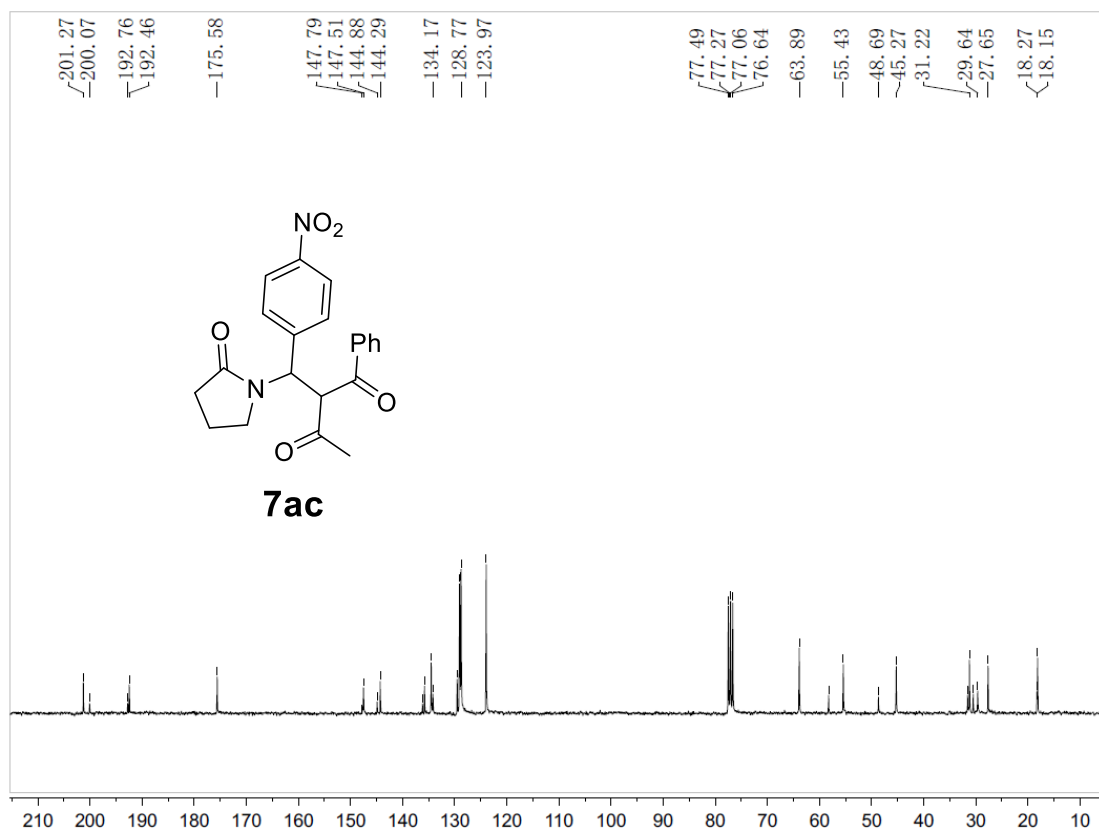

**1-((4-Nitrophenyl)(2,4,6-trimethoxyphenyl)methyl)pyrrolidin-2-one (9):**

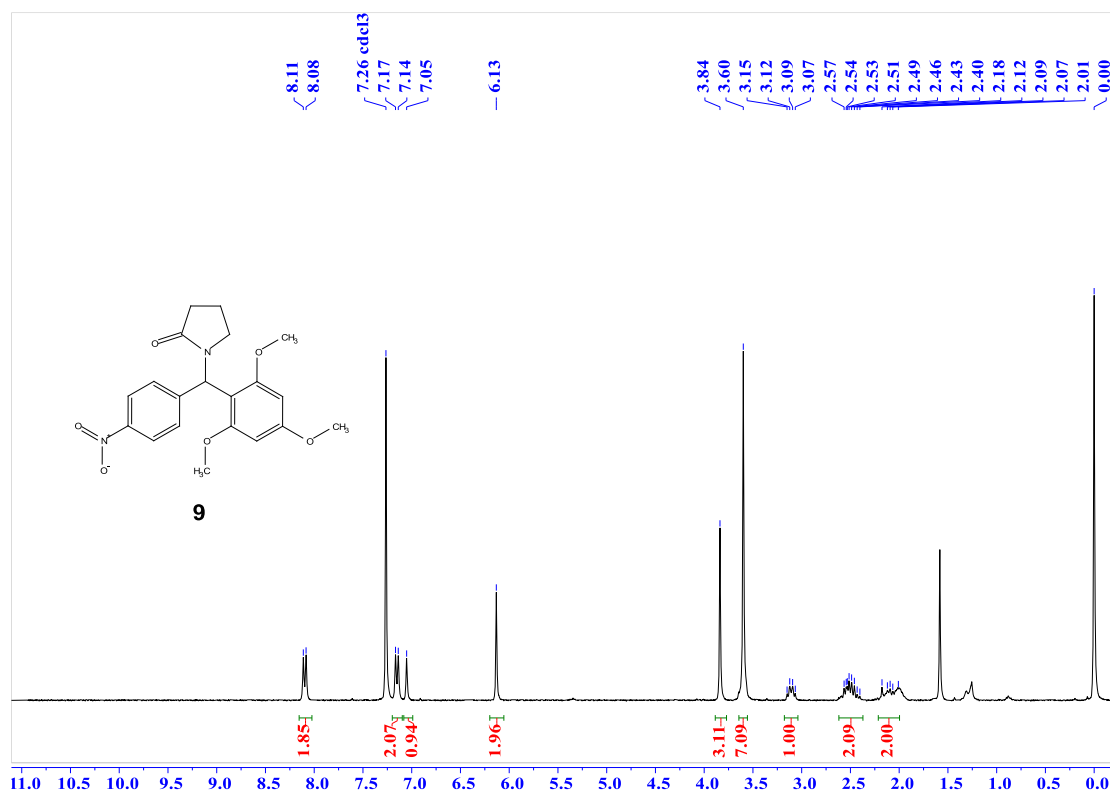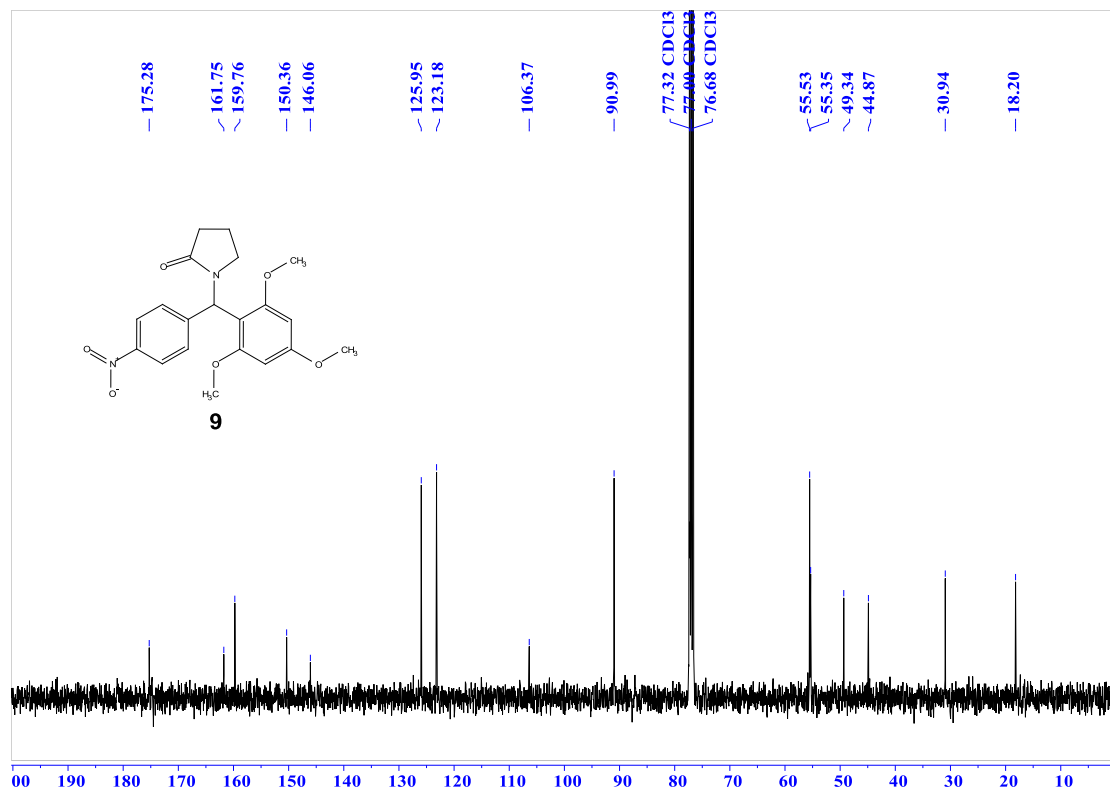

Supplement: d0nj04548a1.pdf [file d0nj04548a1.pdf]
